# Supplementary material for: Studies on the preparation of aminobipyridines and bipyridine sultams via an intramolecular free radical pathway
Source: Royal Society of Chemistry journal article supplement (doi:10.1039/d0ra02026e), 2020-01-01

*Electronic Supporting Information for Publication*

*Studies on the preparation of aminobipyridines and  
bipyridine sultams via an intramolecular free radical  
pathway*

Javier Recio, Fabiana Filace, Elena Gala, Adrián Pérez-Redondo, Julio Alvarez-Builla\*  
and Carolina Burgos\*

Departamento de Química Orgánica y Química Inorgánica and Instituto de Investigación Química "Andrés  
M. del Río" (IQAR), Universidad de Alcalá, 28805-Alcalá de Henares, Madrid, Spain

**Table of contents**

|      |                                                                         |         |
|------|-------------------------------------------------------------------------|---------|
| I.   | Experimental details and characterization data for compounds:           |         |
|      | <b>8a–c</b>                                                             | S2–S4   |
|      | <b>3ba</b>                                                              | S4      |
|      | <b>3d, 3e</b>                                                           | S4–S5   |
|      | <b>3aa–cb</b>                                                           | S5–S8   |
|      | <b>4aa</b>                                                              | S8–S9   |
|      | <b>5aa–bb</b>                                                           | S8–S11  |
|      | <b>4ca–4cb, 4d, 4e</b>                                                  | S11–S13 |
| II.  | X-ray crystallographic data for <b>5ba</b>                              | S14     |
| III. | Copies of <sup>1</sup> H and <sup>13</sup> C-NMR spectra for compounds: | S15–S54 |
|      | <b>8a–c, 3ba, 3d,e, 4aa, 5aa–bb, 4ca–4cb, 4d, 4e</b>                    |         |

## General Information

Reagents of the highest commercial quality were purchased and used without further purification, unless stated otherwise. Reactions were monitored by thin-layer chromatography (TLC) carried out on 0.25 mm E. Merck silica gel plates (60FS-254) using UV light for visualization. Column chromatography was performed using silica gel (60 F254, 70–200 mm) as the stationary phase. All melting points were determined in open capillary tubes, on a Stuart Scientific SMP3 melting point apparatus. IR spectra were obtained on a Perkin–Elmer FTIR spectrum 2000 spectrophotometer.  $^1\text{H}$  and  $^{13}\text{C}$  NMR spectra were recorded with either a Varian Mercury VX-300, Varian Unity 300, or Varian Unity 500 MHz spectrometer. Chemical shifts are given in ppm ( $\delta$ ) downfield from TMS. Coupling constants (J) are in hertz (Hz), and signals are described as follows: s, singlet; d, doublet; t, triplet; q, quadruplet; m, multiplet; br, broad. Samples were analyzed by high pressure liquid chromatography (HP 1260 series) coupled to a mass spectrometer Quadrupole (6120 series) from Agilent Technologies. The chromatographic separation was carried out with a Luna C18 column (100 mm x 4,6 mm x 3  $\mu\text{m}$ ) (supplied by Phenomenex). LC conditions were: flow rate, 1 mL/min; mobile phases, water containing 0,1 % formic acid (A) and methanol containing 0.1 % formic acid (solvent B); elution gradient: 10–100 % B in 20 minutes, 100–10% for 1 min, and 10% for 5 min in order to re-equilibrate the column at the initial conditions; injected volumen, 5  $\mu\text{L}$ ; temperature 50  $^\circ\text{C}$ . High-resolution analyses (HRMS) were performed on an Agilent 6210 time-of-flight LC/MS. Compounds **6a**<sup>12</sup>, **6b**<sup>11</sup>, **10a,b**<sup>14</sup> and **4cb**<sup>17</sup> have been previously described.

## Preparation of compounds **8a–8c**, **3ba**, **3d** and **3e**

### *N*-(2-Bromo-3-pyridyl)pyridine-3-

### sulfonamide **8a**

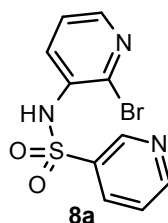

**Method C:** To a stirred solution of 2-bromopyridin-3-amine **7a** (173 mg, 1 mmol) in pyridine (2 mL), pyridine-3-sulfonyl chloride **6a** (354 mg, 2 mmol) was portionwise added during 15 min, at room temperature. The reaction mixture was heated at reflux for an additional period of 5 h. Then, at room temperature, the reaction mixture was treated with water (10 mL) and extracted with EtOAc. The combined organic layers were washed with brine, dried over anhydrous  $\text{Na}_2\text{SO}_4$ , filtered, and concentrated under reduced pressure. The crude product was purified by flash column chromatography on silica gel (1:1 EtOAc/ hexanes) to supply **8a** as a white solid (204 mg, 0.65 mmol, 65%). Mp: 164–165  $^\circ\text{C}$ . IR (KBr)  $\nu_{\text{max}}$  ( $\text{cm}^{-1}$ ) 3062, 1581, 1339, 1169, 586.  $^1\text{H}$  NMR (300 MHz,  $\text{CD}_3\text{OD}$ )  $\delta$  (ppm) 8.85 (d,  $J = 2.3$  Hz, 1H), 8.78

<sup>12</sup> Birch, M.; Sibley, G. E. M.; Law, D.; Oliver, J. D. *PCT. Int. Appl.*, WO 2009144473 A1, 2009.

<sup>11</sup> Dupont-Passelaigue, E.; Le Roy, I.; Pignier, C. *PCT. Int. Appl.*, WO 2012069503 A1, 2012.

<sup>14</sup> (a) S. Blanchard, I. Rodriguez, C. Kuehm-Caubere, P. Renard, B. Pfeiffer, G. Guillaumet and P. Caubere, *Tetrahedron*, 2002, **58**, 3513; (b) G. Abbiati, E.M. Beccalli, G. Broggin, G. Paladino and E. Rossi, *Synthesis*, 2005, 2881.

<sup>17</sup> L. Kaczmarek, *B. Pol. Acad. Sci.-Chem.*, 1985, **33**, 401.

(dd,  $J = 4.9, 1.6$  Hz, 1H), 8.20 (dd,  $J = 4.7, 1.8$  Hz, 1H), 8.11 (ddd,  $J = 8.1, 2.4, 1.6$  Hz, 1H), 7.97 (dd,  $J = 8.0, 1.8$  Hz, 1H), 7.57 (ddd,  $J = 8.1, 4.9, 0.8$  Hz, 1H), 7.45 (dd,  $J = 8.0, 4.7$  Hz, 1H).  $^{13}\text{C}$  NMR (75 MHz,  $\text{CD}_3\text{OD}$ )  $\delta$  (ppm) 154.4, 148.9, 148.6, 140.0, 138.5, 138.0, 136.7, 134.2, 125.6, 125.0. HRMS (ESI-TOF)  $m/z$  calcd for  $\text{C}_{10}\text{H}_9^{79}\text{BrN}_3\text{O}_2\text{S}$  [ $\text{M} + \text{H}$ ] $^+$  313.9593, found: 313.9591.

#### *N*-(3-Bromo-2-pyridyl)pyridine-3-sulfonamide **8b**

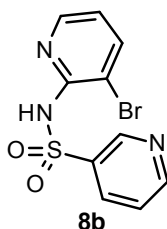

**Method C:** To a stirred solution of 3-bromopyridin-2-amine **7b** (173 mg, 1 mmol) in pyridine (2 mL), pyridine-3-sulfonyl chloride **6a** (354 mg, 2 mmol) was portionwise added during 15 min, at room temperature. The reaction mixture was heated at reflux for an additional period of 5 h. Then, at room temperature, the reaction mixture was treated with water (10 mL) and extracted with EtOAc. The combined organic layers were washed with brine, dried over anhydrous  $\text{Na}_2\text{SO}_4$ , filtered, and concentrated under reduced pressure. The crude product was purified by flash column chromatography on silica gel (1:1 EtOAc/ hexanes) to supply **8b** as a white solid (132 mg, 0.42 mmol, 42%). Mp: 162–164 °C. IR (KBr)  $\nu_{\text{max}}$  ( $\text{cm}^{-1}$ ) 3064, 1580, 1445, 1167, 917, 698.  $^1\text{H}$  NMR (500 MHz,  $\text{DMSO}-d_6$ )  $\delta$  (ppm) 10.84 (brs, 1H), 9.12 (brs, 1H), 8.79 (brs, 1H), 8.34 (brs, 1H), 8.11 (brs, 2H), 7.62 (brs, 1H), 6.98 (brs, 1H). HPLC-MS (ES-API) 314.0, 316.0 [ $\text{M} + \text{H}$ ] $^+$ ,  $t_R$  7.829 min (100%). HRMS (ESI-TOF)  $m/z$  calcd for  $\text{C}_{10}\text{H}_9^{79}\text{BrN}_3\text{O}_2\text{S}$  [ $\text{M} + \text{H}$ ] $^+$  313.9593, found: 313.9588.

#### *N*-2-Bromo-3-pyridyl)pyridine-2-

#### sulfonamide **8c**

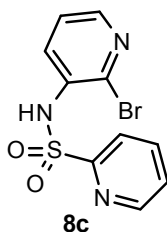

**Method C:** To a stirred solution of 2-bromopyridin-3-amine **7a** (173 mg, 1 mmol) in pyridine (2 mL), pyridine-2-sulfonyl chloride **6b** (354 mg, 2 mmol) was portionwise added during 15 min, at room temperature. The reaction mixture was heated at reflux for an additional period of 5 h. Then, at room temperature, the reaction mixture was treated with water (10 mL) and extracted with EtOAc. The combined organic layers were washed with brine, dried over anhydrous  $\text{Na}_2\text{SO}_4$ , filtered, and concentrated under reduced pressure. The crude product was purified by flash column chromatography on silica gel (3:7 EtOAc/ hexanes) to supply **8c** as a white solid (194 mg, 0.62 mmol, 62%). Mp: 129–131 °C. IR (KBr)  $\nu_{\text{max}}$  ( $\text{cm}^{-1}$ ) 3060, 1447, 1181, 593.  $^1\text{H}$  NMR (300 MHz,  $\text{CDCl}_3$ )  $\delta$  (ppm) 8.68 (d,  $J = 4.7$  Hz, 1H), 8.16 – 8.05 (m, 2H), 7.98 – 7.86 (m, 2H), 7.51 (ddd,  $J = 7.5, 4.7, 1.3$  Hz, 1H), 7.29 (brs, 1H), 7.23 (dd,  $J = 8.0, 4.6$  Hz,

1H). <sup>13</sup>C NMR (75 MHz, CDCl<sub>3</sub>) δ (ppm) 156.3, 150.6, 145.4, 142.1, 138.3, 131.1, 130.2, 127.6, 123.4, 122.5. HRMS (ESI-TOF) m/z calcd for C<sub>10</sub>H<sub>9</sub><sup>79</sup>BrN<sub>3</sub>O<sub>2</sub>S [M + H]<sup>+</sup> 313.9593, found: 313.9587.

### *N*-(3-Bromo-2-pyridyl)-*N*-methyl-pyridine-3-sulfonamide **3ba**

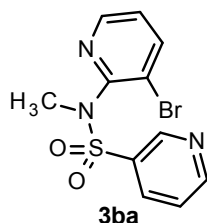

**Method C:** To a stirred solution of 3-bromo-*N*-methyl-pyridin-2-amine **10a** (187 mg, 1 mmol) in pyridine (2 mL), pyridine-3-sulfonyl chloride **6a** (355 mg, 2 mmol) was portionwise added during 15 min, at room temperature. The reaction mixture was heated at reflux for an additional period of 5 h. Then, at room temperature, the reaction mixture was treated with a saturated NaHCO<sub>3</sub> solution (10 mL) and extracted with EtOAc. The combined organic layers were washed with brine, dried over anhydrous Na<sub>2</sub>SO<sub>4</sub>, filtered, and concentrated under reduced pressure. The crude product was purified by flash column chromatography on silica gel (7:3 EtOAc/ hexanes) to supply **3ba** as a white solid (192 mg, 0.58 mmol, 58%). Mp: 106–111 °C. IR (KBr) ν<sub>max</sub> (cm<sup>-1</sup>) 3060, 1575, 1409, 1163, 752, 603. <sup>1</sup>H NMR (300 MHz, CDCl<sub>3</sub>) δ (ppm) 9.09 (d, *J* = 1.7 Hz, 1H), 8.84 (dd, *J* = 4.8, 1.7 Hz, 1H), 8.34 (dd, *J* = 4.6, 1.7 Hz, 1H), 8.20 (ddd, *J* = 8.0, 2.2, 1.7 Hz, 1H), 8.05 (dd, *J* = 8.0, 1.7 Hz, 1H), 7.50 (dd, *J* = 8.1, 4.9 Hz, 1H), 7.19 (dd, *J* = 8.0, 4.6 Hz, 1H), 3.15 (s, 3H). <sup>13</sup>C NMR (75 MHz, CDCl<sub>3</sub>) δ (ppm) 153.1, 152.4, 149.4, 147.8, 143.1, 136.7, 135.1, 125.1, 123.7, 121.7, 37.1. HRMS (ESI-TOF) m/z calcd for C<sub>11</sub>H<sub>11</sub><sup>79</sup>BrN<sub>3</sub>O<sub>2</sub>S [M + H]<sup>+</sup> 327.9750, found: 327.9751.

### *N*-(3-Bromo-2-pyridyl)-*N*-methyl-pyridine-2-sulfonamide **3d**

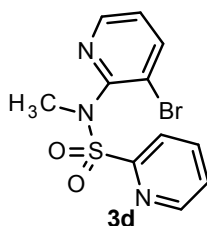

**Method C:** To a stirred solution of 3-bromo-*N*-methyl-pyridin-2-amine **10a** (187 mg, 1 mmol) in pyridine (2 mL), pyridine-2-sulfonyl chloride **6b** (354 mg, 2 mmol) was portionwise added during 15 min, at room temperature. The reaction mixture was heated at reflux for an additional period of 5 h. Then, at room temperature, the reaction mixture was treated with a saturated NaHCO<sub>3</sub> solution (10 mL) and extracted with EtOAc. The combined organic layers were washed with brine, dried over anhydrous Na<sub>2</sub>SO<sub>4</sub>, filtered, and concentrated under reduced pressure. The crude product was purified by flash column chromatography on silica gel (7:3 EtOAc/ hexanes) to supply **3d** as a white solid (203 mg, 0.62 mmol, 62%). Mp: 121–123 °C. IR (KBr) ν<sub>max</sub> (cm<sup>-1</sup>) 3035, 1567, 1354, 1172, 607, 569. <sup>1</sup>H NMR (300 MHz, CDCl<sub>3</sub>) δ (ppm) 8.77 (d, *J* = 4.5 Hz, 1H), 8.21 (dd, *J* = 4.6, 1.7 Hz, 1H), 7.99 (dd, *J* = 8.0, 1.7 Hz, 1H), 7.93 – 7.84 (m, 2H), 7.52 (ddd,

$J = 6.7, 4.7, 2.2$  Hz, 1H), 7.12 (dd,  $J = 8.0, 4.6$  Hz, 1H), 3.43 (s, 3H).  $^{13}\text{C}$  NMR (75 MHz,  $\text{CDCl}_3$ )  $\delta$  (ppm) 157.3, 152.5, 149.9, 147.6, 142.9, 137.8, 126.8, 124.8, 123.3, 121.1, 38.3. HRMS (ESI-TOF)  $m/z$  calcd for  $\text{C}_{11}\text{H}_{11}^{79}\text{BrN}_3\text{O}_2\text{S}$   $[\text{M} + \text{H}]^+$  327.9749, found: 327.9746.

### *N*-(3-Bromo-5-methyl-2-pyridyl)-*N*-methyl-pyridine-2-sulfonamide **3e**

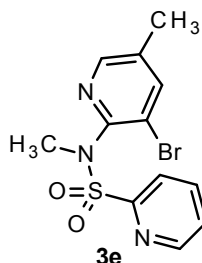

**Method C:** To a stirred solution of 3-bromo-*N*,5-dimethyl-pyridin-2-amine **10b** (201 mg, 1 mmol) in pyridine (2 mL), pyridine-2-sulfonyl chloride **6b** (354 mg, 2 mmol) was portionwise added during 15 min, at room temperature. The reaction mixture was heated at reflux for an additional period of 5 h. Then, at room temperature, the reaction mixture was treated with a saturated  $\text{NaHCO}_3$  solution (10 mL) and extracted with EtOAc. The combined organic layers were washed with brine, dried over anhydrous  $\text{Na}_2\text{SO}_4$ , filtered, and concentrated under reduced pressure. The crude product was purified by flash column chromatography on silica gel (6:4 EtOAc/ hexanes) to supply **3e** as a white solid (318 mg, 0.93 mmol, 93%). Mp: 114–116 °C. IR (KBr)  $\nu_{\text{max}}$  ( $\text{cm}^{-1}$ ) 3060, 1576, 1557, 1353, 1169, 743, 584.  $^1\text{H}$  NMR (300 MHz,  $\text{CDCl}_3$ )  $\delta$  (ppm) 8.76 (dd,  $J = 4.7, 1.6$  Hz, 1H), 8.02 (dd,  $J = 2.1, 0.7$  Hz, 1H), 7.91–7.83 (m, 2H), 7.81 (dd,  $J = 2.1, 0.7$  Hz, 1H), 7.50 (ddd,  $J = 6.7, 4.7, 2.1$  Hz, 1H), 3.39 (s, 3H), 2.29 (s, 3H).  $^{13}\text{C}$  NMR (75 MHz,  $\text{CDCl}_3$ )  $\delta$  (ppm) 157.5, 150.1, 149.9, 148.1, 143.1, 137.7, 135.3, 126.7, 123.3, 120.7, 38.3, 17.7. HRMS (ESI-TOF)  $m/z$  calcd for  $\text{C}_{12}\text{H}_{13}^{79}\text{BrN}_3\text{O}_2\text{S}$   $[\text{M} + \text{H}]^+$  341.9905, found: 341.9894.

### Preparation of compounds **3aa**, **3ab**, **3bb**, **3ca** and **3cb**

#### *N*-(2-Bromo-3-pyridyl)-*N*-methyl-

#### pyridine-3-sulfonamide **3aa**

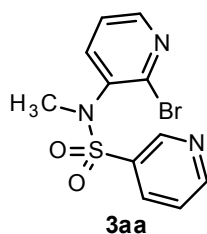

To a stirred solution of *N*-(2-bromo-3-pyridyl)pyridine-3-sulfonamide **8a** (314 mg, 1 mmol) in dry DMF (3 mL) and at 0 °C, NaH 60% (48 mg, 1.2 mmol) was added. The reaction mixture was stirred for 20 min at the same temperature and methyl iodide (156 mg, 1.1 mmol, 68  $\mu\text{L}$ ) was added. The reaction mixture was stirred at the same temperature for 30 additional min and then at room temperature for 5h. The reaction mixture was treated with a saturated  $\text{NaHCO}_3$  solution (10 mL) and extracted with EtOAc. The combined

organic layers were washed with brine, dried over anhydrous Na<sub>2</sub>SO<sub>4</sub>, filtered, and concentrated under reduced pressure. The crude product was purified by flash column chromatography on silica gel (6:4 EtOAc/ hexanes) to supply **3aa** as a white solid (213 mg, 0.65 mmol, 65%). Mp: 82–84 °C. IR (KBr)  $\nu_{\max}$  (cm<sup>-1</sup>) 3063, 1561, 1350, 1163, 1040, 757, 568. <sup>1</sup>H NMR (300 MHz, CDCl<sub>3</sub>)  $\delta$  (ppm) 9.02 (d,  $J$  = 2.3 Hz, 1H), 8.85 (dd,  $J$  = 4.9, 1.6 Hz, 1H), 8.37 (dd,  $J$  = 4.7, 1.8 Hz, 1H), 8.04 (ddd,  $J$  = 8.1, 2.4, 1.7 Hz, 1H), 7.76 (dd,  $J$  = 7.9, 1.9 Hz, 1H), 7.48 (ddd,  $J$  = 8.0, 4.9, 0.8 Hz, 1H), 7.35 (dd,  $J$  = 7.8, 4.6 Hz, 1H), 3.31 (s, 3H). <sup>13</sup>C NMR (75 MHz, CDCl<sub>3</sub>)  $\delta$  (ppm) 153.7, 149.8, 148.4, 143.1, 140.5, 137.0, 135.7, 135.2, 123.8, 123.4, 38.0. HRMS (ESI-TOF)  $m/z$  calcd for C<sub>11</sub>H<sub>11</sub><sup>79</sup>BrN<sub>3</sub>O<sub>2</sub>S [M + H]<sup>+</sup> 327.9749, found: 327.9749.

### ***N*-(2-Bromo-3-pyridyl)-*N*-(methoxymethyl)pyridine-3-sulfonamide **3ab****

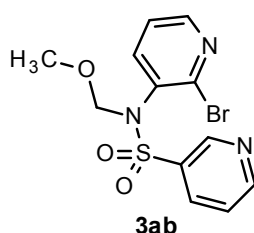

To a stirred solution of *N*-(2-bromo-3-pyridyl)pyridine-3-sulfonamide **8a** (314 mg, 1 mmol) in dry DMF (3 mL) and at 0 °C, NaH 60% (48 mg, 1.2 mmol) was added. The reaction mixture was stirred for 20 min at the same temperature and methoxymethyl chloride (89 mg, 1.1 mmol, 84  $\mu$ L) was added. The reaction mixture was stirred at the same temperature for 30 additional min and then at room temperature for 5h. The reaction mixture was treated with a saturated NaHCO<sub>3</sub> solution (10 mL) and extracted with EtOAc. The combined organic layers were washed with brine, dried over anhydrous Na<sub>2</sub>SO<sub>4</sub>, filtered, and concentrated under reduced pressure. The crude product was purified by flash column chromatography on silica gel (4:6 EtOAc/ CH<sub>2</sub>Cl<sub>2</sub>) to supply **3ab** as a yellow solid (295 mg, 0.82 mmol, 82%). Mp: 82–84 °C. IR (KBr)  $\nu_{\max}$  (cm<sup>-1</sup>) 3052, 1573, 1402, 1175, 1052, 743. <sup>1</sup>H NMR (500 MHz, CDCl<sub>3</sub>)  $\delta$  (ppm) 8.92 (d,  $J$  = 2.2 Hz, 1H), 8.81 (dd,  $J$  = 4.8, 1.4 Hz, 1H), 8.37 (dd,  $J$  = 4.7, 1.8 Hz, 1H), 7.95 (dd,  $J$  = 8.1, 2.0 Hz, 1H), 7.73 (dd,  $J$  = 7.8, 1.8 Hz, 1H), 7.42 (dd,  $J$  = 8.0, 4.9 Hz, 1H), 7.34 (dd,  $J$  = 7.8, 4.7 Hz, 1H), 5.32 (brs, 1H), 4.83 (brs, 1H), 3.47 (s, 3H). <sup>13</sup>C NMR (75 MHz, CDCl<sub>3</sub>)  $\delta$  (ppm) 153.7, 150.2, 148.6, 143.8, 142.4, 136.2, 135.3, 133.7, 123.6, 123.3, 81.9, 56.5. HRMS (ESI-TOF)  $m/z$  calcd for C<sub>12</sub>H<sub>13</sub><sup>79</sup>BrN<sub>3</sub>O<sub>3</sub>S [M + H]<sup>+</sup> 357.9856, found: 357.9851.

### ***N*-(3-Bromo-2-pyridyl)-*N*-(methoxymethyl)pyridine-3-sulfonamide **3bb****

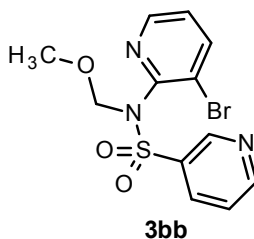

To a stirred solution of *N*-(3-bromo-2-pyridyl)pyridine-3-sulfonamide **8b** (314 mg, 1 mmol) in dry DMF (3 mL) and at 0 °C, NaH 60% (48 mg, 1.2 mmol) was added. The reaction mixture was stirred for 20 min at the same temperature and methoxymethyl chloride (89 mg, 1.1 mmol, 84  $\mu$ L) was added. The reaction mixture was stirred at the same temperature for 30 additional min and then at room temperature for 5h. The reaction mixture was treated with a saturated NaHCO<sub>3</sub> solution (10 mL) and extracted with EtOAc. The combined organic layers were washed with brine, dried over anhydrous Na<sub>2</sub>SO<sub>4</sub>, filtered, and concentrated under reduced pressure. The crude product was purified by flash column chromatography on silica gel (7:3 EtOAc/ hexanes) to supply **3bb** as a white solid (291 mg, 0.81 mmol, 81%). Mp: 102–103 °C. IR (KBr)  $\nu_{\max}$  (cm<sup>-1</sup>) 3066, 1428, 1354, 1175, 1014, 621. <sup>1</sup>H NMR (500 MHz, CDCl<sub>3</sub>)  $\delta$  (ppm) 9.10 (d, *J* = 2.2 Hz, 1H), 8.81 (dd, *J* = 4.8, 1.6 Hz, 1H), 8.38 (dd, *J* = 4.6, 1.6 Hz, 1H), 8.22 (ddd, *J* = 8.1, 2.3, 1.7 Hz, 1H), 8.05 (dd, *J* = 7.9, 1.7 Hz, 1H), 7.46 (ddd, *J* = 8.1, 4.9, 0.7 Hz, 1H), 7.21 (dd, *J* = 7.9, 4.6 Hz, 1H), 5.05 (s, 2H), 3.32 (s, 3H). <sup>13</sup>C NMR (75 MHz, CDCl<sub>3</sub>)  $\delta$  (ppm) 153.4, 151.1, 149.3, 147.9, 143.2, 137.4, 136.0, 125.3, 123.5, 122.5, 82.7, 57.0. HRMS (ESI-TOF) *m/z* calcd for C<sub>12</sub>H<sub>13</sub><sup>79</sup>BrN<sub>3</sub>O<sub>3</sub>S [M + H]<sup>+</sup> 357.9856, found: 357.9849.

#### *N*-(2-Bromo-3-pyridyl)-*N*-methyl-pyridine-2-sulfonamide **3ca**

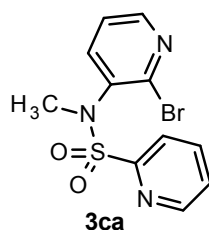

To a stirred solution of *N*-2-bromo-3-pyridyl)pyridine-2-sulfonamide **8c** (314 mg, 1 mmol) in dry DMF (3 mL) and at 0 °C, NaH 60% (48 mg, 1.2 mmol) was added. The reaction mixture was stirred for 20 min at the same temperature and methyl iodide (156 mg, 1.1 mmol, 68  $\mu$ L) was added. The reaction mixture was stirred at the same temperature for 30 additional min and then at room temperature for 5h. The reaction mixture was treated with a saturated NaHCO<sub>3</sub> solution (10 mL) and extracted with EtOAc. The combined organic layers were washed with brine, dried over anhydrous Na<sub>2</sub>SO<sub>4</sub>, filtered, and concentrated under reduced pressure. The crude product was purified by flash column chromatography on silica gel (4:6 EtOAc/ hexanes) to supply **3ca** as a white solid (298 mg, 0.90 mmol, 90%). Mp: 80–84 °C. IR (KBr)  $\nu_{\max}$  (cm<sup>-1</sup>) 3037, 1558, 1399, 1355, 1111, 742, 571. <sup>1</sup>H NMR (300 MHz, CDCl<sub>3</sub>)  $\delta$  (ppm) 8.76 (d, *J* = 4.7 Hz, 1H), 8.32 (dd, *J* = 4.7, 1.8 Hz, 1H), 7.93–7.89 (m, 2H), 7.87 (dd, *J* = 7.8, 1.8 Hz, 1H), 7.54 (ddd, *J* = 6.2, 4.7, 2.6 Hz, 1H), 7.30 (dd, *J* = 7.9, 4.7 Hz, 1H), 3.38 (s, 3H). <sup>13</sup>C NMR (75 MHz, CDCl<sub>3</sub>)  $\delta$  (ppm) 157.2, 150.3, 149.5, 144.0, 140.3, 138.3, 137.9, 127.2, 123.5, 123.0, 39.0. HRMS (ESI-TOF) *m/z* calcd for C<sub>11</sub>H<sub>11</sub><sup>79</sup>BrN<sub>3</sub>O<sub>2</sub>S [M + H]<sup>+</sup> 327.9749, found: 327.9746.

### *N*-(2-Bromo-3-pyridyl)-*N*-(methoxymethyl)pyridine-2-sulfonamide **3cb**

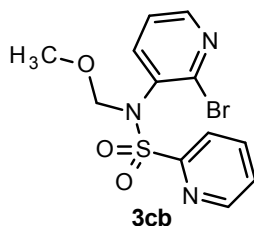

To a stirred solution of *N*-(2-bromo-3-pyridyl)pyridine-2-sulfonamide **8c** (314 mg, 1 mmol) in dry DMF (3 mL) and at 0 °C, NaH 60% (48 mg, 1.2 mmol) was added. The reaction mixture was stirred for 20 min at the same temperature and methoxymethyl chloride (89 mg, 1.1 mmol, 84  $\mu$ L) was added. The reaction mixture was stirred at the same temperature for 30 additional min and then at room temperature for 5h. The reaction was treated with a saturated NaHCO<sub>3</sub> solution (10 mL) and extracted with EtOAc. The combined organic layers were washed with brine, dried over anhydrous Na<sub>2</sub>SO<sub>4</sub>, filtered, and concentrated under reduced pressure. The crude product was purified by flash column chromatography on silica gel (4:6 EtOAc/ hexanes) to supply **3cb** as a white solid (340 mg, 0.95 mmol, 95%). Mp: 134–136 °C. IR (KBr)  $\nu_{\text{max}}$  (cm<sup>-1</sup>) 3083, 2937, 1401, 1357, 1177, 1012, 742, 599. <sup>1</sup>H NMR (300 MHz, CDCl<sub>3</sub>)  $\delta$  (ppm) 8.71 (d, *J* = 4.7 Hz, 1H), 8.33 (dd, *J* = 4.7, 1.8 Hz, 1H), 7.89 – 7.76 (m, 3H), 7.50 (dd, *J* = 7.3, 4.6 Hz, 1H), 7.28 (dd, *J* = 7.8, 4.7 Hz, 1H), 5.18 (brs, 2H), 3.47 (s, 3H). <sup>13</sup>C NMR (75 MHz, CDCl<sub>3</sub>)  $\delta$  (ppm) 157.4, 151.0, 150.3, 149.6, 142.8, 138.2, 132.4, 127.2, 123.2, 122.5, 82.8, 56.6. HRMS (ESI-TOF) *m/z* calcd for C<sub>12</sub>H<sub>13</sub><sup>79</sup>BrN<sub>3</sub>O<sub>3</sub>S [M + H]<sup>+</sup> 357.9856, found: 357.9862.

### Preparation of compounds **4aa**, **5aa–bb**, **4ca–cb**, **4d** and **4e**

#### *N*-Methyl-2-(3-pyridyl)pyridin-3-amine **4aa** and 5-methyldipyrido[3,2-*c*:3',2'-*f*]thiazine 6,6-dioxide **5aa**

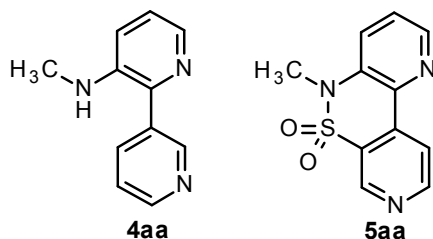

A solution of TTMSS (223 mg, 0.9 mmol) and AIBN (147 mg, 0.9 mmol) in dry *m*-xylene (10 mL) and dry acetonitrile (0.2 mL) was added dropwise, by using a syringe pump during 36 h, to a stirred solution of **3aa** (98 mg, 0.3 mmol) in dry *m*-xylene (1 mL) at 80 °C (bath temperature), under an atmosphere of dry argon. When the addition was finished, the reaction mixture was stirred for an additional 12 h period, at the same temperature, until full consumption of **3aa** (TLC analysis). The resulting solution was concentrated, treated with a saturated NaHCO<sub>3</sub> solution and the mixture extracted with EtAcO. The combined organic layer was dried with anhydrous Na<sub>2</sub>SO<sub>4</sub>, filtered and concentrated under reduced pressure. Separation and purification by TLC (silica gel, hexane/EtOAc (1:9)) provided **4aa** as white semisolid (9 mg, 0.049 mmol, 16%, *R<sub>f</sub>* = 0.15) and **5aa** (28 mg, 0.133 mmol, 38%, *R<sub>f</sub>* = 0.40). **4aa**: IR (KBr)  $\nu_{\text{max}}$  (cm<sup>-1</sup>) 3423, 2925,



1581, 1498, 1161, 714. <sup>1</sup>H NMR (300 MHz, CDCl<sub>3</sub>) δ (ppm) 8.90 (d, *J* = 2.3 Hz, 1H), 8.64 (dd, *J* = 4.8, 1.7 Hz, 1H), 8.08 (dd, *J* = 4.7, 1.4 Hz, 1H), 7.96 (ddd, *J* = 7.8, 2.3, 1.7 Hz, 1H), 7.41 (ddd, *J* = 7.8, 4.9, 0.9 Hz, 1H), 7.20 (dd, *J* = 8.3, 4.7 Hz, 1H), 7.00 (dd, *J* = 8.3, 1.4 Hz, 1H), 4.05 (brs, 1H), 2.82 (d, *J* = 4.8 Hz, 3H). <sup>13</sup>C NMR (75 MHz, CDCl<sub>3</sub>) δ (ppm) 149.7, 149.4, 143.10, 142.3, 138.3, 136.6, 134.5, 123.9, 123.8, 117.1, 30.6. HRMS (ESI-TOF) *m/z* calcd for C<sub>11</sub>H<sub>12</sub>N<sub>3</sub> [M + H]<sup>+</sup> 186.1026, found: 186.1025. **5aa**: Mp: 158–162 °C. IR (KBr) ν<sub>max</sub> (cm<sup>-1</sup>) 3288, 1584, 1322, 1163, 728, 619. <sup>1</sup>H NMR (300 MHz, CDCl<sub>3</sub>) δ (ppm) 9.23 (d, *J* = 0.8 Hz, 1H), 9.00 (d, *J* = 5.3 Hz, 1H), 8.64 (dd, *J* = 4.5, 1.5 Hz, 1H), 8.44 (dd, *J* = 5.3, 0.8 Hz, 1H), 7.63 (dd, *J* = 8.4, 1.5 Hz, 1H), 7.54 (dd, *J* = 8.4, 4.4 Hz, 1H), 3.53 (s, 3H). <sup>13</sup>C NMR (75 MHz, CDCl<sub>3</sub>) δ (ppm) 153.3, 145.5, 143.5, 139.6, 138.9, 137.9, 130.3, 126.3, 126.0, 119.5, 31.6. HRMS (ESI-TOF) *m/z* calcd for C<sub>11</sub>H<sub>10</sub>N<sub>3</sub>O<sub>2</sub>S [M + H]<sup>+</sup> 248.0488, found: 248.0490.

### 5-(Methoxymethyl)dipyrido[3,2-*c*:3',2'-*f*]thiazine 6,6-dioxide **5ab**

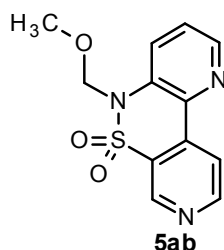

A solution of TTMSS (223 mg, 0.9 mmol) and AIBN (147 mg, 0.9 mmol) in dry *m*-xylene (10 mL) and dry acetonitrile (0.2 mL) was added dropwise, by using a syringe pump during 36 h, to a stirred solution of **3ab** (107 mg, 0.3 mmol) in dry *m*-xylene (1 mL) at 80 °C (bath temperature), under an atmosphere of dry argon. When the addition was finished, the reaction mixture was stirred for an additional 12 h period, at the same temperature, until full consumption of **3ab** (TLC analysis). The resulting solution was concentrated, treated with a saturated NaHCO<sub>3</sub> solution and the mixture extracted with EtAcO. The combined organic layer was dried with anhydrous Na<sub>2</sub>SO<sub>4</sub>, filtered and concentrated under reduced pressure. Purification by TLC (silica gel, hexane/EtOAc (5:95)) provided **5ab** as white solid (36.0 mg, 0.194 mmol, 64%). Mp: 158–162 °C. IR (KBr) ν<sub>max</sub> (cm<sup>-1</sup>) 3055, 2944, 1655, 1584, 1345, 1183, 1080, 754. <sup>1</sup>H NMR (300 MHz, CDCl<sub>3</sub>) δ (ppm) 9.20 (d, *J* = 0.6 Hz, 1H), 8.99 (d, *J* = 5.3 Hz, 1H), 8.67 (dd, *J* = 4.5, 1.4 Hz, 1H), 8.42 (dd, *J* = 5.3, 0.7 Hz, 1H), 8.03 (dd, *J* = 8.4, 1.4 Hz, 1H), 7.51 (dd, *J* = 8.4, 4.5 Hz, 1H), 5.26 (s, 2H), 3.52 (s, 3H). <sup>13</sup>C NMR (75 MHz, CDCl<sub>3</sub>) δ (ppm) 153.4, 146.8, 143.2, 139.7, 139.6, 136.9, 131.4, 128.5, 126.5, 119.8, 80.3, 56.7. HRMS (ESI-TOF) *m/z* calcd for C<sub>12</sub>H<sub>12</sub>N<sub>3</sub>O<sub>3</sub>S [M + H]<sup>+</sup> 278.0594, found: 278.0591.

### 6-Methyldipyrido[2,3-b:2',3'-d]thiazine 5,5-dioxide **5ba**

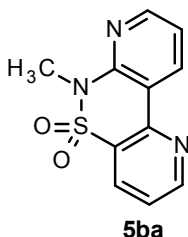

A solution of TTMSS (223 mg, 0.9 mmol) and AIBN (147 mg, 0.9 mmol) in dry *m*-xylene (10 mL) and dry acetonitrile (0.2 mL) was added dropwise, by using a syringe pump during 36 h, to a stirred solution of **3ba** (98 mg, 0.3 mmol) in dry *m*-xylene (1 mL) at 80 °C (bath temperature), under an atmosphere of dry argon. When the addition was finished, the reaction mixture was stirred for an additional 12 h period, at the same temperature, until full consumption of **3ba** (TLC analysis). The resulting solution was concentrated, treated with a saturated NaHCO<sub>3</sub> solution and the mixture extracted with EtAcO. The combined organic layer was dried with anhydrous Na<sub>2</sub>SO<sub>4</sub>, filtered and concentrated under reduced pressure. Purification by TLC (silica gel, hexane/EtOAc (1:1)) provided **5ba** as white solid (41 mg, 0.166 mmol, 55%). Mp: 158–160 °C. IR (KBr)  $\nu_{\max}$  (cm<sup>-1</sup>) 3071, 1582, 1429, 1322, 1165, 887. <sup>1</sup>H NMR (300 MHz, CDCl<sub>3</sub>)  $\delta$  (ppm) 8.95 (dd, *J* = 4.7, 1.7 Hz, 1H), 8.92 (dd, *J* = 7.8, 1.9 Hz, 1H), 8.58 (dd, *J* = 4.8, 1.9 Hz, 1H), 8.32 (dd, *J* = 8.0, 1.7 Hz, 1H), 7.53 (dd, *J* = 8.0, 4.8 Hz, 1H), 7.30 (dd, *J* = 7.8, 4.8 Hz, 1H), 3.68 (s, 3H). <sup>13</sup>C NMR (75 MHz, CDCl<sub>3</sub>)  $\delta$  (ppm) 153.2, 150.8, 150.0, 147.1, 135.3, 130.5, 129.8, 123.1, 119.4, 118.4, 28.6. HRMS (ESI-TOF) *m/z* calcd for C<sub>11</sub>H<sub>10</sub>N<sub>3</sub>O<sub>2</sub>S [M + H]<sup>+</sup> 248.0488, found: 308.0491.

### 6-(Methoxymethyl)dipyrido[2,3-b:2',3'-d]thiazine 5,5-dioxide **5bb**

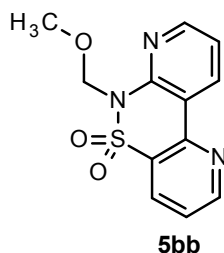

A solution of TTMSS (223 mg, 0.9 mmol) and AIBN (147 mg, 0.9 mmol) in dry *m*-xylene (10 mL) and dry acetonitrile (0.2 mL) was added dropwise, by using a syringe pump during 36 h, to a stirred solution of **3bb** (107 mg, 0.3 mmol) in dry *m*-xylene (1 mL) at 80 °C (bath temperature), under an atmosphere of dry argon. When the addition was finished, the reaction mixture was stirred for an additional 12 h period, at the same temperature, until full consumption of **3bb** (TLC analysis). The resulting solution was concentrated, treated with a saturated NaHCO<sub>3</sub> solution and the mixture extracted with EtAcO. The combined organic layer was dried with anhydrous Na<sub>2</sub>SO<sub>4</sub>, filtered and concentrated under reduced pressure. Purification by TLC (silica gel, hexane/EtOAc (3:7)) provided **5bb** as white solid (44 mg, 0.158 mmol, 53%). Mp: 129–132 °C. IR (KBr)  $\nu_{\max}$  (cm<sup>-1</sup>) 2960, 1583, 1425, 1328, 1261, 1060, 841. <sup>1</sup>H NMR (500 MHz, CDCl<sub>3</sub>)  $\delta$  (ppm)

9.06 – 8.87 (m, 2H), 8.64 (dd,  $J = 4.7, 1.9$  Hz, 1H), 8.33 (dd,  $J = 8.0, 1.6$  Hz, 1H), 7.55 (dd,  $J = 8.0, 4.7$  Hz, 1H), 7.37 (dd,  $J = 7.8, 4.8$  Hz, 1H), 5.72 (s, 2H), 3.44 (s, 3H).  $^{13}\text{C}$  NMR (75 MHz,  $\text{CDCl}_3$ )  $\delta$  (ppm) 153.4, 151.3, 149.5, 147.5, 135.9, 130.9, 130.5, 123.3, 120.7, 119.4, 75.7, 57.4. HRMS (ESI-TOF)  $m/z$  calcd for  $\text{C}_{12}\text{H}_{12}\text{N}_3\text{O}_3\text{S}$  [ $\text{M} + \text{H}$ ] $^+$  278.0594, found: 278.0596.

#### ***N*-Methyl-2-(2-pyridyl)pyridin-3-amine 4ca**

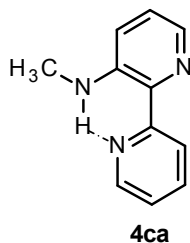

A solution of TTMSS (223 mg, 0.9 mmol) and AIBN (147 mg, 0.9 mmol) in dry *m*-xylene (10 mL) and dry acetonitrile (0.2 mL) was added dropwise, by using a syringe pump during 36 h, to a stirred solution of **3ca** (98 mg, 0.3 mmol) in dry *m*-xylene (1 mL) at 80 °C (bath temperature), under an atmosphere of dry argon. When the addition was finished, the reaction mixture was stirred for an additional 12 h period, at the same temperature, until full consumption of **3ca** (TLC analysis). The resulting solution was concentrated, treated with a saturated  $\text{NaHCO}_3$  solution and the mixture extracted with EtAcO. The combined organic layer was dried with anhydrous  $\text{Na}_2\text{SO}_4$ , filtered and concentrated under reduced pressure. Purification by TLC (silica gel, hexane/EtOAc (7:3)) provided **4ca** as white solid (41 mg, 0.221 mmol, 74%). Mp: 66–68 °C. IR (KBr)  $\nu_{\text{max}}$  ( $\text{cm}^{-1}$ ) 3062, 2982, 1582, 1339, 1170, 1113, 700, 587.  $^1\text{H}$  NMR (300 MHz,  $\text{CDCl}_3$ )  $\delta$  (ppm) 9.19 (brs, 1H), 8.61 – 8.50 (m, 2H), 8.00 (dd,  $J = 4.4, 1.5$  Hz, 1H), 7.79 (ddd,  $J = 8.2, 7.4, 1.9$  Hz, 1H), 7.23 – 7.15 (m, 2H), 7.03 (dd,  $J = 8.4, 1.4$  Hz, 1H), 2.95 (d,  $J = 5.0$  Hz, 3H).  $^{13}\text{C}$  NMR (75 MHz,  $\text{CDCl}_3$ )  $\delta$  (ppm) 159.7, 146.5, 146.2, 136.6, 136.5, 135.7, 124.9, 122.5, 121.8, 117.7, 29.4. HRMS (ESI-TOF)  $m/z$  calcd for  $\text{C}_{11}\text{H}_{12}\text{N}_3$  [ $\text{M} + \text{H}$ ] $^+$  186.1026, found: 186.1026.

#### **2-(2-Pyridyl)pyridin-3-amine 4cb<sup>17</sup>**

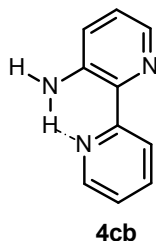

A solution of TTMSS (223 mg, 0.9 mmol) and AIBN (147 mg, 0.9 mmol) in dry *m*-xylene (10 mL) and dry acetonitrile (0.2 mL) was added dropwise, by using a syringe pump during 36 h, to a stirred solution of **3cb** (107 mg, 0.3 mmol) in dry *m*-xylene (1 mL) at 80 °C (bath temperature), under an atmosphere of dry

<sup>17</sup> L. Kaczmarek, *B. Pol. Acad. Sci.-Chem.*, 1985, **33**, 401.

argon. When the addition was finished, the reaction mixture was stirred for an additional 12 h period, at the same temperature, until full consumption of **3cb** (TLC analysis). The resulting solution was concentrated, treated with a saturated NaHCO<sub>3</sub> solution and the mixture extracted with EtAcO. The combined organic layer was dried with anhydrous Na<sub>2</sub>SO<sub>4</sub>, filtered and concentrated under reduced pressure. Purification by TLC (silica gel, hexane/EtOAc (7:3)) provided **4cb** as white solid (33 mg, 0.193 mmol, 64%). Mp: 102–106 °C. IR (KBr)  $\nu_{\max}$  (cm<sup>-1</sup>) 3389, 3264, 3044, 1601, 1446, 1147, 751, 631. <sup>1</sup>H NMR (300 MHz, CDCl<sub>3</sub>)  $\delta$  (ppm) 8.57 (ddd,  $J = 4.9, 1.8, 0.9$  Hz, 1H), 8.50 (dt,  $J = 8.2, 1.0$  Hz, 1H), 8.07 (dd,  $J = 4.2, 1.7$  Hz, 1H), 7.81 (ddd,  $J = 8.2, 7.5, 1.9$  Hz, 1H), 7.22 (ddd,  $J = 7.4, 4.9, 1.2$  Hz, 1H), 7.09 (dd,  $J = 8.2, 4.2$  Hz, 1H), 7.04 (dd,  $J = 8.2, 1.7$  Hz, 1H), 6.36 (brs, 2H). <sup>13</sup>C NMR (126 MHz, CDCl<sub>3</sub>)  $\delta$  (ppm) 159.5, 147.0, 144.0, 138.2, 137.2, 136.7, 124.6, 124.5, 122.4, 122.0. HRMS (ESI-TOF)  $m/z$  calcd for C<sub>10</sub>H<sub>10</sub>N<sub>3</sub> [M + H]<sup>+</sup> 172.0870, found: 172.0873.

#### ***N*-Methyl-3-(2-pyridyl)pyridin-2-amine 4d**

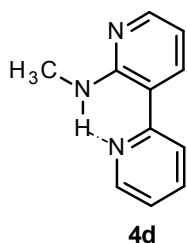

A solution of TTMSS (223 mg, 0.9 mmol) and AIBN (147 mg, 0.9 mmol) in dry *m*-xylene (10 mL) and dry acetonitrile (0.2 mL) was added dropwise, by using a syringe pump during 36 h, to a stirred solution of **3d** (98 mg, 0.3 mmol) in dry *m*-xylene (1 mL) at 80 °C (bath temperature), under an atmosphere of dry argon. When the addition was finished, the reaction mixture was stirred for an additional 12 h period, at the same temperature, until full consumption of **3d** (TLC analysis). The resulting solution was concentrated, treated with a saturated NaHCO<sub>3</sub> solution and the mixture extracted with EtAcO. The combined organic layer was dried with anhydrous Na<sub>2</sub>SO<sub>4</sub>, filtered and concentrated under reduced pressure. Purification by TLC (silica gel, hexane/EtOAc (7:3)) provided **4d** as yellow oil (47 mg, 0.254 mmol, 85%). IR (NaCl)  $\nu_{\max}$  (cm<sup>-1</sup>) 3418, 1595, 1519, 1386, 1241, 1100, 769, 569. <sup>1</sup>H NMR (300 MHz, CDCl<sub>3</sub>)  $\delta$  (ppm) 8.93 (brs, 1H), 8.58 (d,  $J = 4.8$  Hz, 1H), 8.21 (dd,  $J = 4.9, 1.8$  Hz, 1H), 7.78 (dd,  $J = 7.6, 1.8$  Hz, 1H), 7.72 (dd,  $J = 7.1, 1.8$  Hz, 1H), 7.68 (d,  $J = 8.1$  Hz, 1H), 7.18 (ddd,  $J = 6.5, 4.9, 1.4$  Hz, 1H), 6.59 (dd,  $J = 7.6, 4.9$  Hz, 1H), 3.09 (d,  $J = 4.9$  Hz, 3H). <sup>13</sup>C NMR (75 MHz, CDCl<sub>3</sub>)  $\delta$  (ppm) 157.6, 149.1 (2C), 147.6, 137.0, 135.9, 121.7, 121.3, 116.1, 111.2, 28.2. HRMS (ESI-TOF)  $m/z$  calcd for C<sub>11</sub>H<sub>12</sub>N<sub>3</sub> [M + H]<sup>+</sup> 186.1026, found: 186.1030.

***N*,5-Dimethyl-3-(2-pyridyl)pyridin-2-amine 4e**

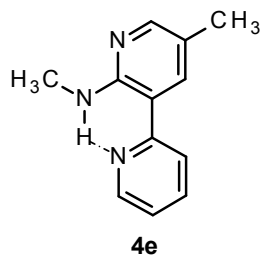

A solution of TTMSS (223 mg, 0.9 mmol) and AIBN (147 mg, 0.9 mmol) in dry *m*-xylene (10 mL) and dry acetonitrile (0.2 mL) was added dropwise, by using a syringe pump during 36 h, to a stirred solution of **3e** (103 mg, 0.3 mmol) in dry *m*-xylene (1 mL) at 80 °C (bath temperature), under an atmosphere of dry argon. When the addition was finished, the reaction mixture was stirred for an additional 12 h period, at the same temperature, until full consumption of **3e** (TLC analysis). The resulting solution was concentrated, treated with a saturated NaHCO<sub>3</sub> solution and the mixture extracted with EtAcO. The combined organic layer was dried with anhydrous Na<sub>2</sub>SO<sub>4</sub>, filtered and concentrated under reduced pressure. Purification by TLC (silica gel, hexane/EtOAc (7:3)) provided **4e** as yellow oil (53 mg, 0.266 mmol, 89%). IR (KBr)  $\nu_{\max}$  (cm<sup>-1</sup>) 3423, 1666, 1618, 1221, 1019, 795, 568. <sup>1</sup>H NMR (300 MHz, CDCl<sub>3</sub>)  $\delta$  (ppm) 8.60 (brs, 1H), 8.58 (dd, *J* = 4.9, 1.7 Hz, 1H), 8.04 (d, *J* = 2.2 Hz, 1H), 7.77–7.65 (m, 2H), 7.62 (d, *J* = 1.8 Hz, 1H), 7.18 (ddd, *J* = 7.1, 4.9, 1.4 Hz, 1H), 3.08 (d, *J* = 4.8 Hz, 3H), 2.25 (s, 3H). <sup>13</sup>C NMR (75 MHz, CDCl<sub>3</sub>)  $\delta$  (ppm) 157.6, 155.9, 148.6, 147.6, 137.0, 136.9, 121.7, 121.2, 119.7, 115.9, 28.5, 17.7. HRMS (ESI-TOF) *m/z* calcd for C<sub>12</sub>H<sub>14</sub>N<sub>3</sub> [M + H]<sup>+</sup> 200.1182, found: 200.1179.

### X-ray crystallographic data for **5ba**

Colourless crystals of **5ba** were obtained from a recrystallization process in toluene. The crystals were covered with a layer of a viscous perfluoropolyether (FomblinY). A suitable crystal was selected with the aid of a microscope, mounted on a cryoloop, and placed in the low temperature nitrogen stream of the diffractometer. The intensity data sets were collected at 200 K on a Bruker-Nonius KappaCCD diffractometer equipped with an Oxford Cryostream 700 unit. Crystallographic data are presented in Table S1. The structure was solved, using the WINGX package,<sup>18</sup> by intrinsic phasing methods (SHELXT),<sup>19</sup> and refined by least-squares against  $F^2$  (SHELXL-2014/7).<sup>20</sup> All non-hydrogen atoms were anisotropically refined, whereas hydrogen atoms were included, positioned geometrically and refined by using a riding model.

**Table S1.** Experimental data for the X-ray diffraction study on **5ba**.

| <b>5ba</b>                                   |                                                                |
|----------------------------------------------|----------------------------------------------------------------|
| CCDC <sup>a</sup> code                       | 1967009                                                        |
| Formula                                      | C <sub>11</sub> H <sub>9</sub> N <sub>3</sub> O <sub>2</sub> S |
| $M_r$                                        | 247.27                                                         |
| $T$ [K]                                      | 200(2)                                                         |
| $\lambda$ [Å]                                | 0.71073                                                        |
| crystal system                               | Triclinic                                                      |
| space group                                  | $P\bar{1}$                                                     |
| $a$ [Å]; $\alpha$ [°]                        | 6.974(1); 99.96(1)                                             |
| $b$ [Å]; $\beta$ [°]                         | 7.876(1); 95.92(1)                                             |
| $c$ [Å]; $\gamma$ [°]                        | 9.808(1); 97.05(1)                                             |
| $V$ [Å <sup>3</sup> ]                        | 522.3(1)                                                       |
| $Z$                                          | 2                                                              |
| $\rho_{\text{calcd}}$ [g cm <sup>-3</sup> ]  | 1.572                                                          |
| $\mu_{\text{MoK}\alpha}$ [mm <sup>-1</sup> ] | 0.302                                                          |
| $F(000)$                                     | 256                                                            |
| crystal size [mm <sup>3</sup> ]              | 0.39×0.36×0.22                                                 |
| $\theta$ range (deg)                         | 2.65 to 27.50                                                  |
| index ranges                                 | -9 to 9,<br>-10 to 10,<br>-12 to 12                            |
| Reflections collected                        | 13956                                                          |
| Unique data                                  | 2389 [ $R_{\text{int}} = 0.034$ ]                              |
| obsd data [ $I > 2\sigma(I)$ ]               | 2086                                                           |
| Goodness-of-fit on $F^2$                     | 1.159                                                          |
| final $R^a$ indices [ $I > 2\sigma(I)$ ]     | $R1 = 0.042$ ,<br>$wR2 = 0.104$                                |
| $R^b$ indices (all data)                     | $R1 = 0.050$ ,<br>$wR2 = 0.112$                                |
| largest diff. peak/hole [e Å <sup>-3</sup> ] | 0.424/-0.747                                                   |

Cambridge Crystallographic Data Centre. <sup>b</sup> $R1 = \Sigma||F_o| - |F_c|| / [\Sigma|F_o|]$ ,  $wR2 = \{[\Sigma w(F_o^2 - F_c^2)^2] / [\Sigma w(F_o^2)^2]\}^{1/2}$

Copies of <sup>1</sup>H and <sup>13</sup>C-NMR spectra for compounds **8a–c**, **3ba**, **3d,e**, **4aa**, **5aa–bb**, **4ca–4cb**, **4d**, **4f**

<sup>18</sup> L. J. Farrugia, *J. Appl. Crystallogr.* 2012, **45**, 849.

<sup>19</sup> G. M. Sheldrick, *Acta Crystallogr., Sect. A* 2015, **71**, 3.

<sup>20</sup> G. M. Sheldrick, *Acta Crystallogr., Sect. C* 2015, **71**, 3.



$^1\text{H-NMR}$  300 MHz,  $\text{CD}_3\text{OD}$

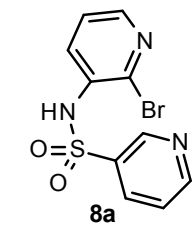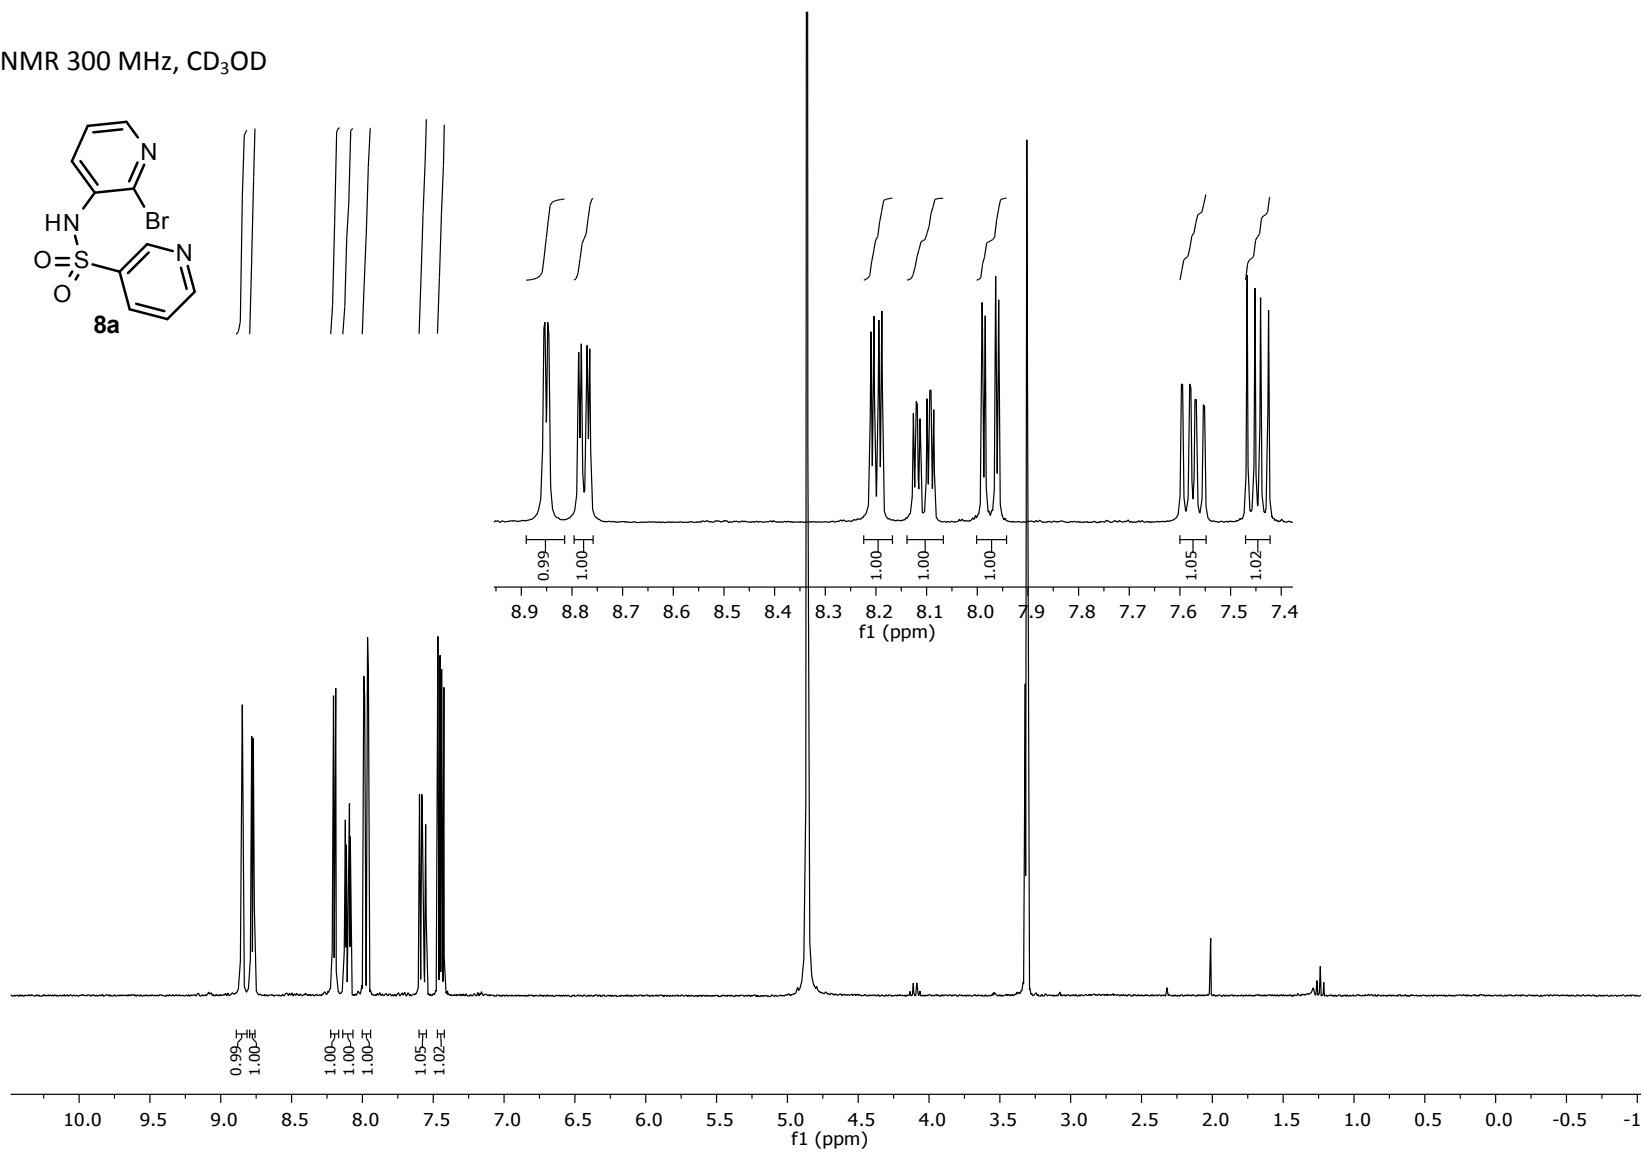



154.4  
148.9  
148.6  
140.0  
138.6  
138.0  
136.7  
134.2  
125.6  
125.0

$^{13}\text{C-NMR}$  75 MHz,  $\text{CD}_3\text{OD}$

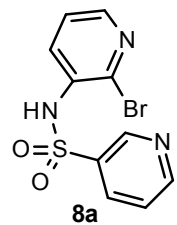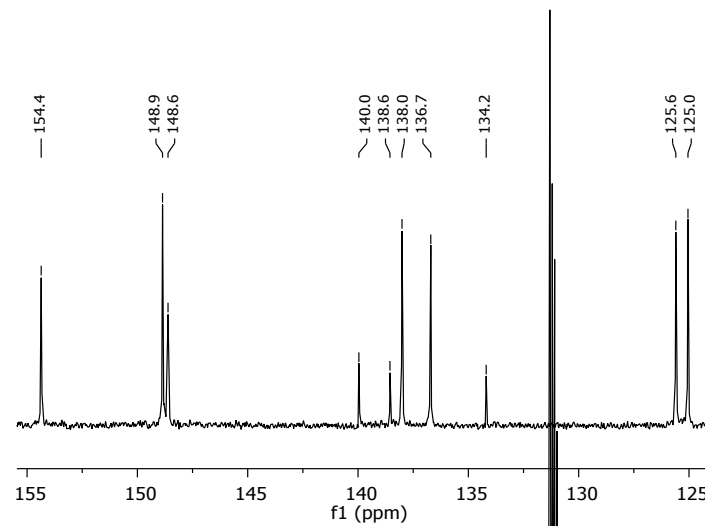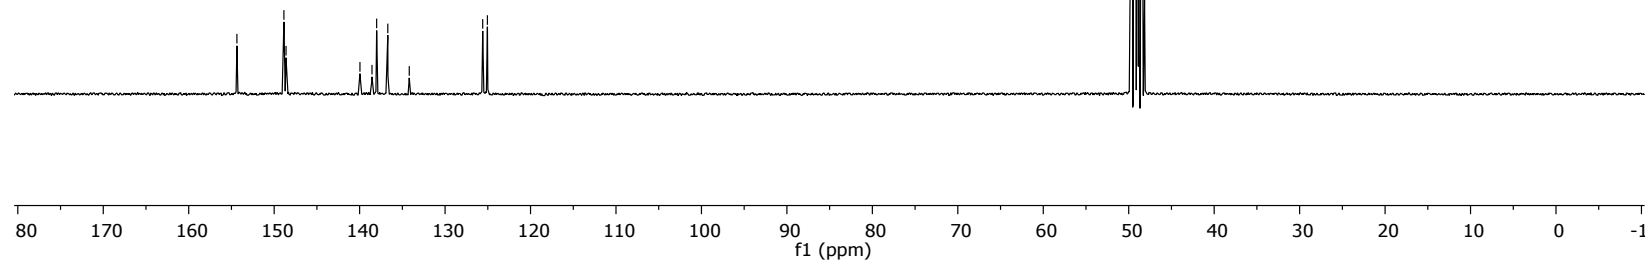

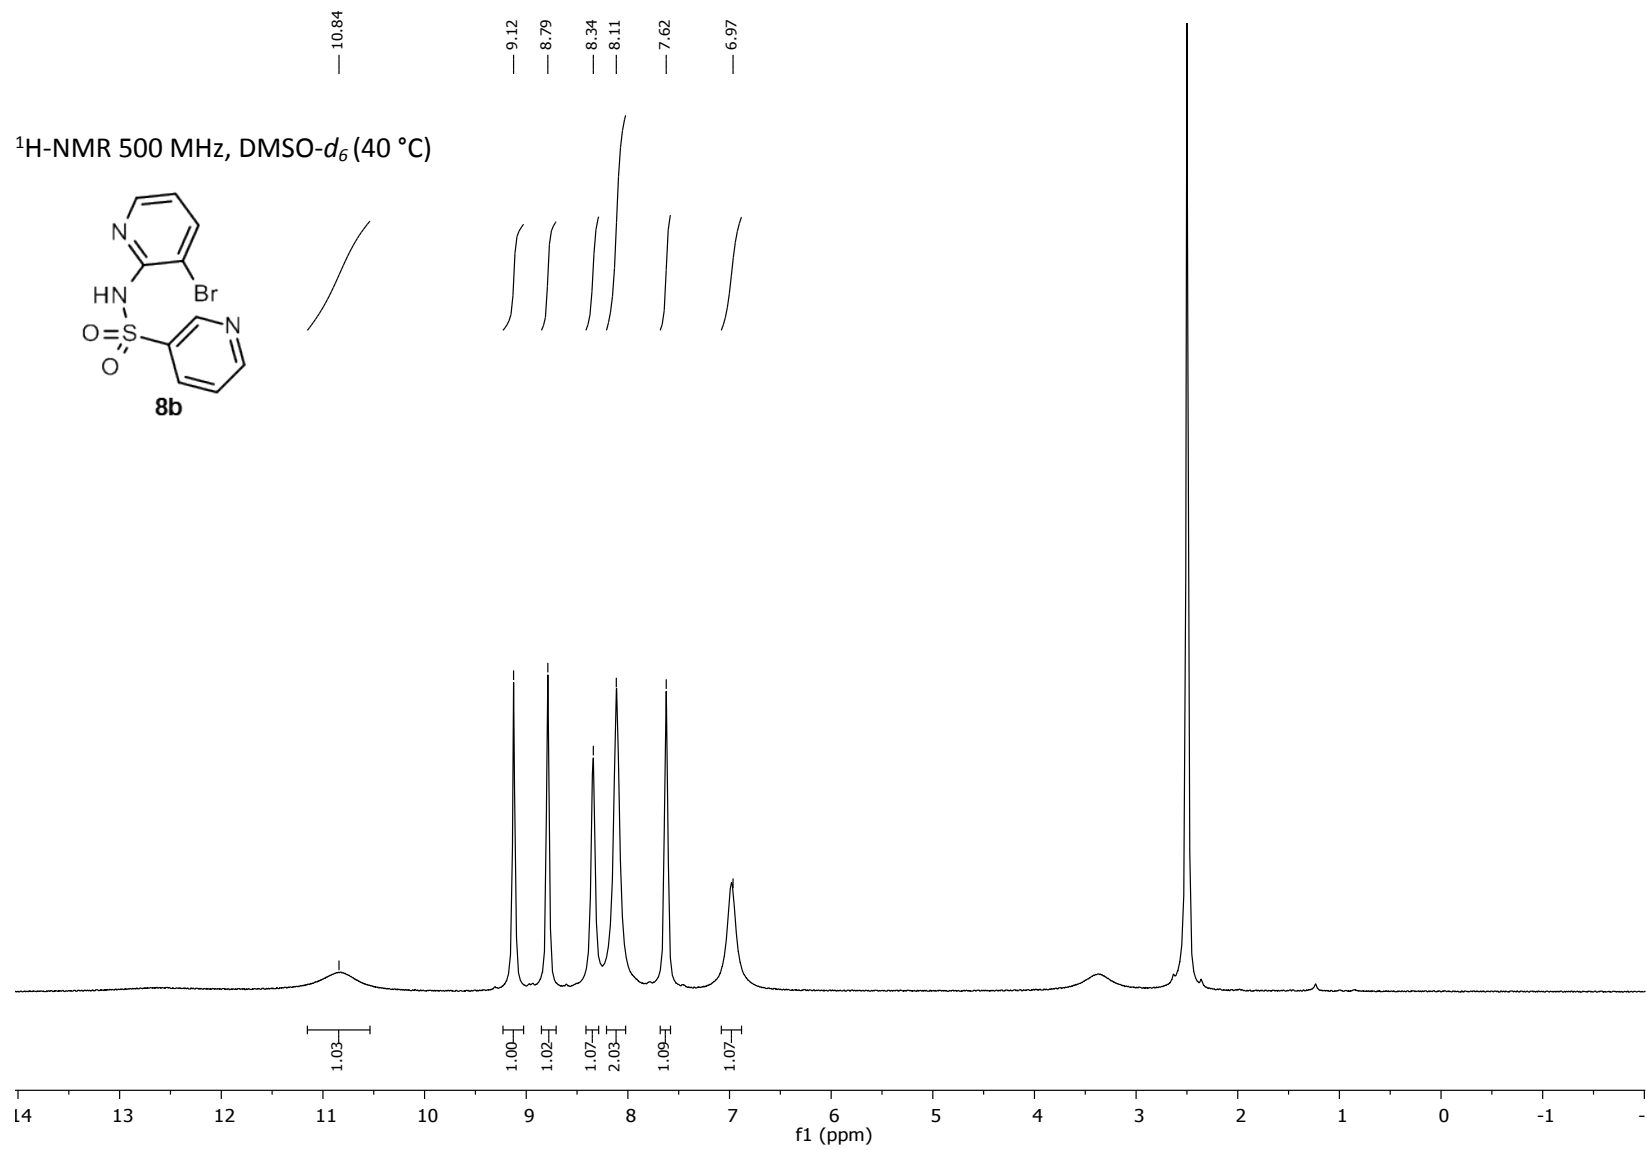

$^1\text{H-NMR}$  300 MHz,  $\text{CDCl}_3$

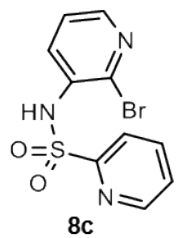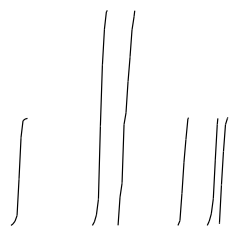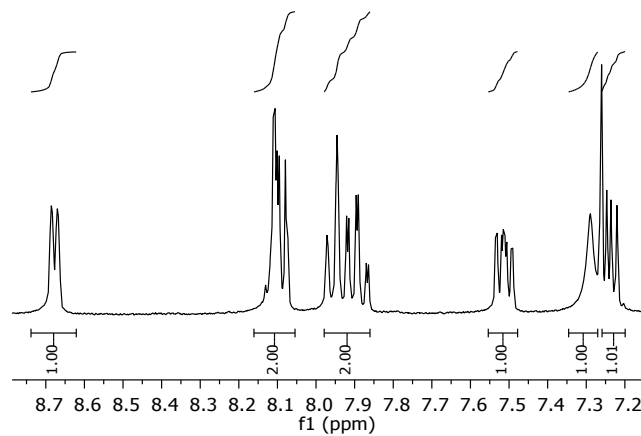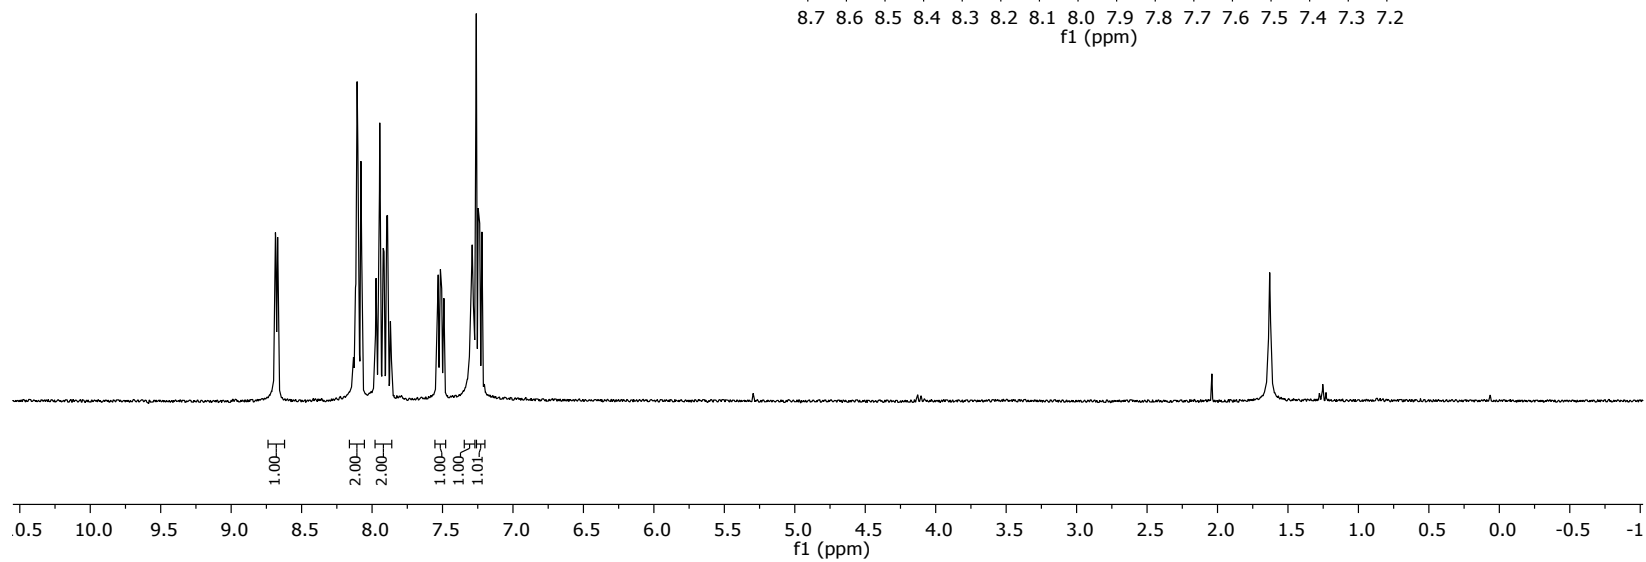

$^{13}\text{C-NMR}$  75 MHz,  $\text{CDCl}_3$

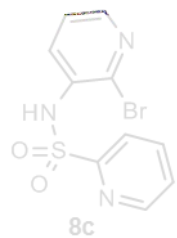

— 156.3  
— 150.6  
— 145.4  
— 142.1  
— 138.3  
— 131.1  
— 130.2  
— 127.6  
— 123.4  
— 122.5

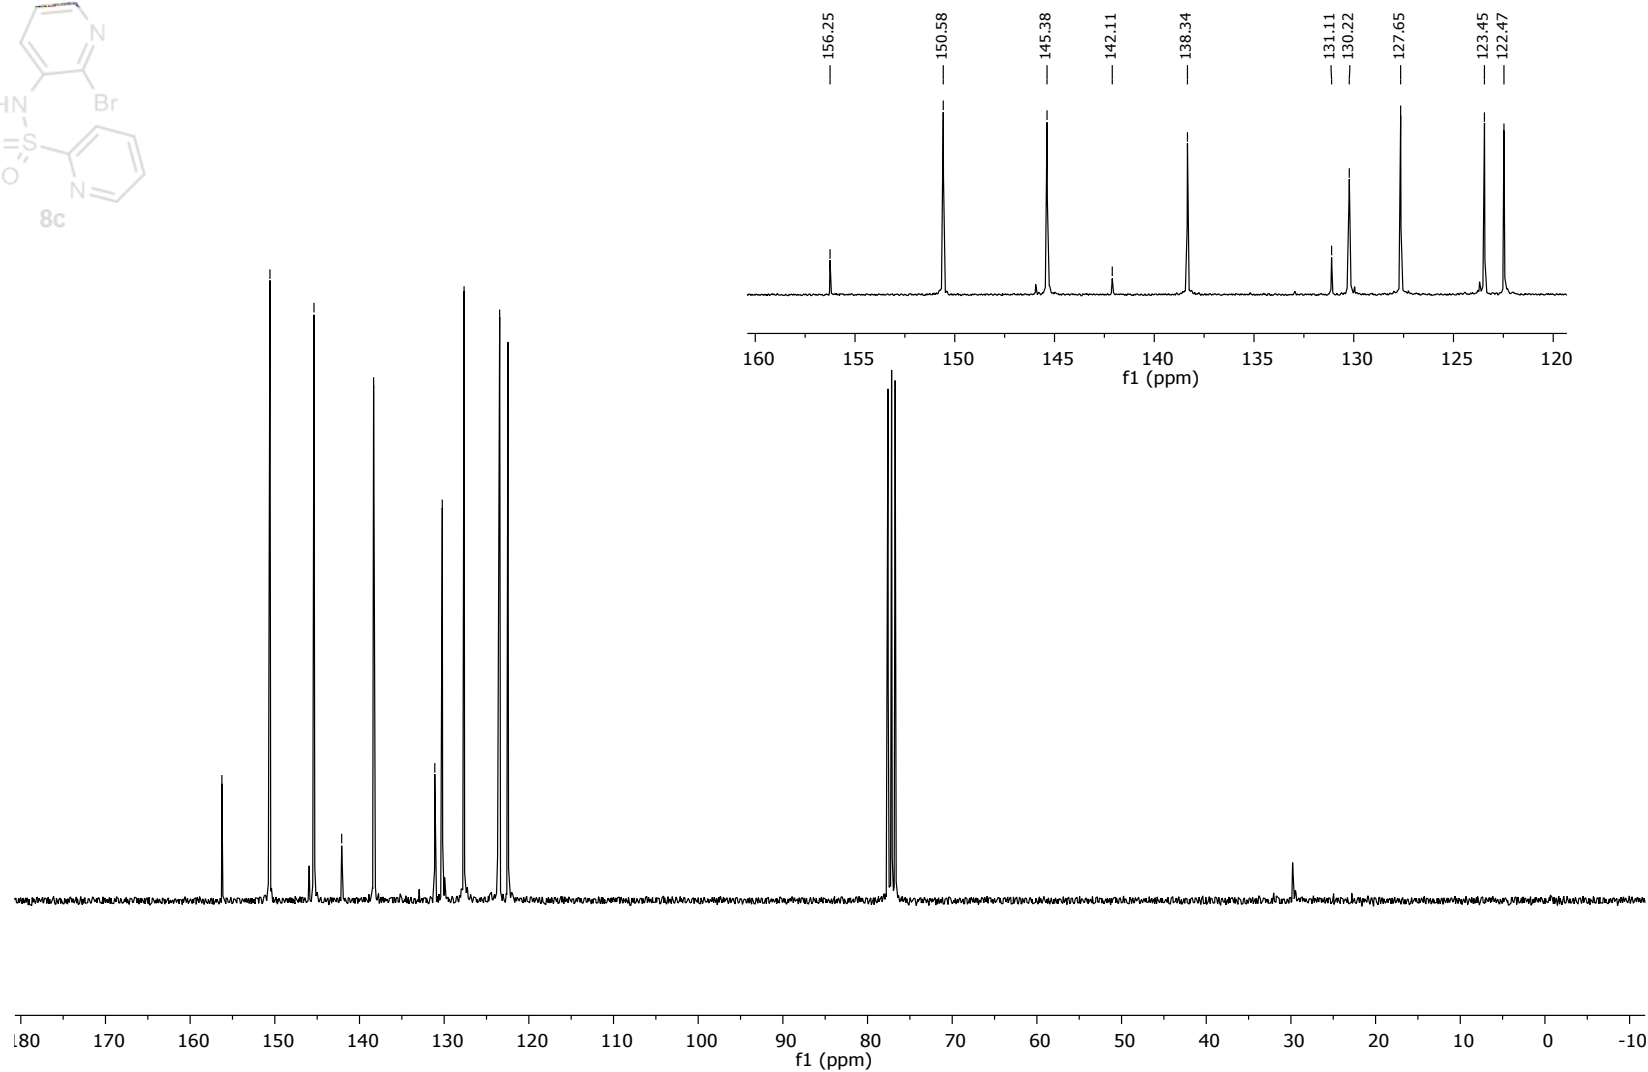

$^1\text{H-NMR}$  300 MHz,  $\text{CDCl}_3$

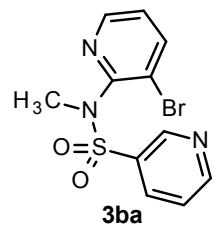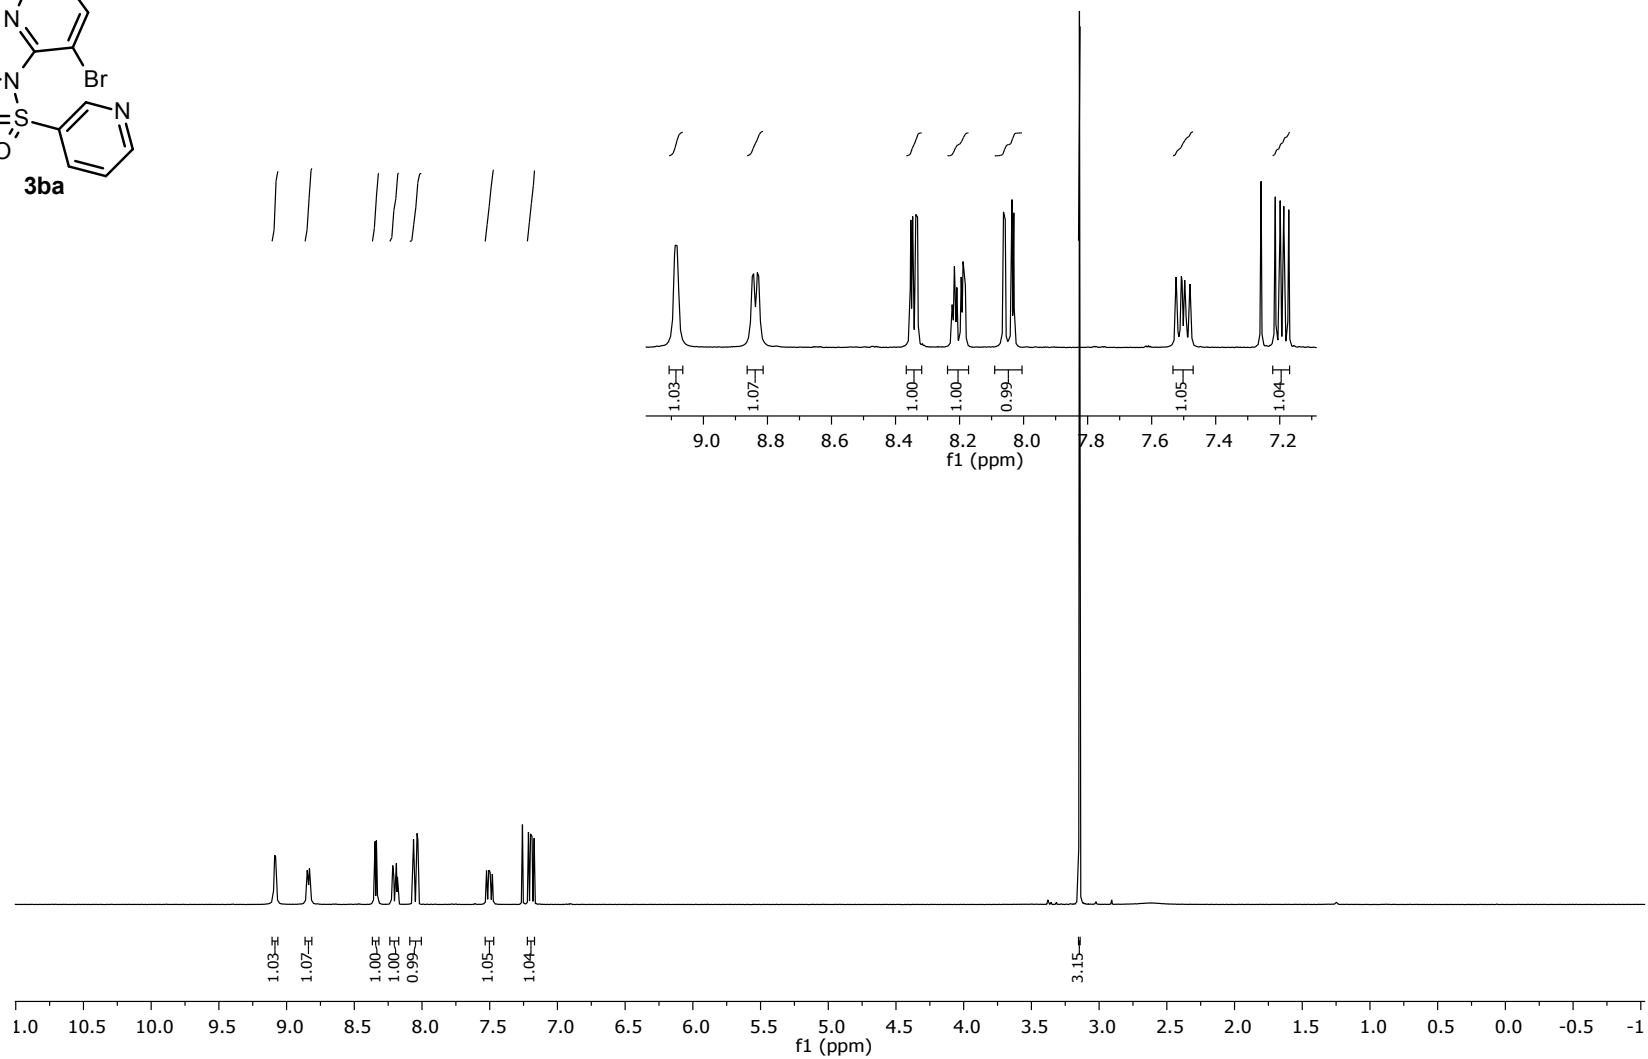

<sup>13</sup>C-NMR 75 MHz, CDCl<sub>3</sub>

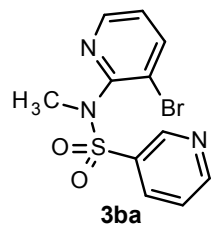

153.1  
152.4  
149.4  
147.8  
143.1  
136.7  
135.1  
125.1  
123.7  
121.7

37.1

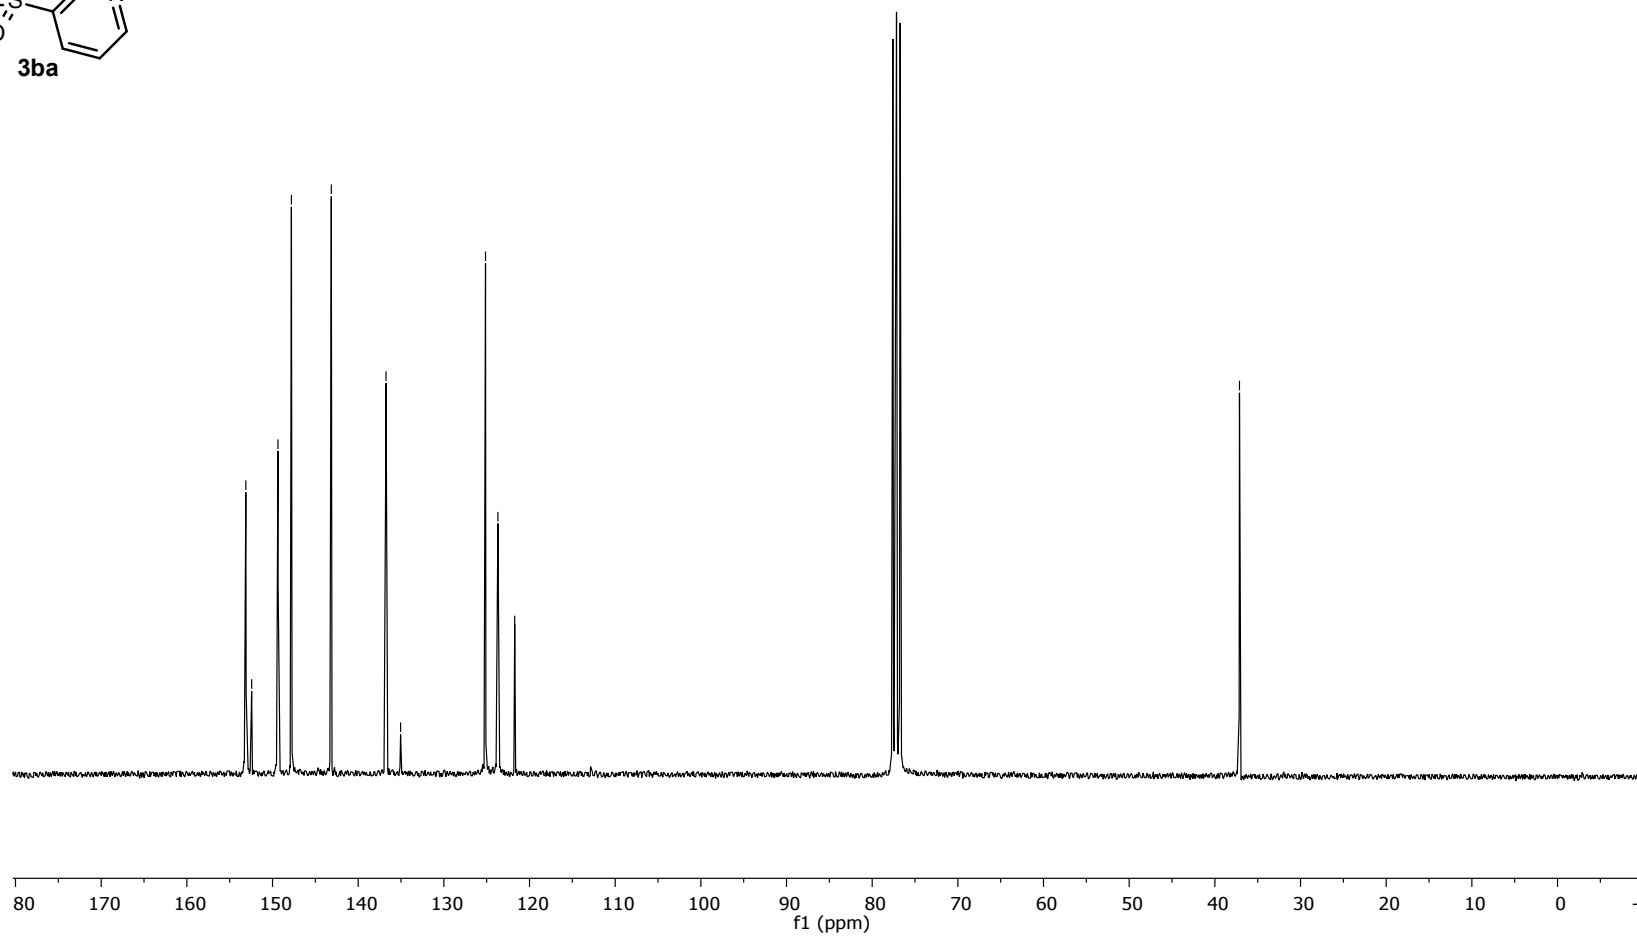

H-NMR 300 MHz, CDCl<sub>3</sub>

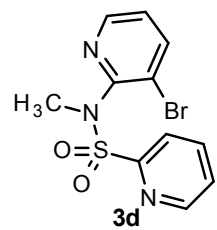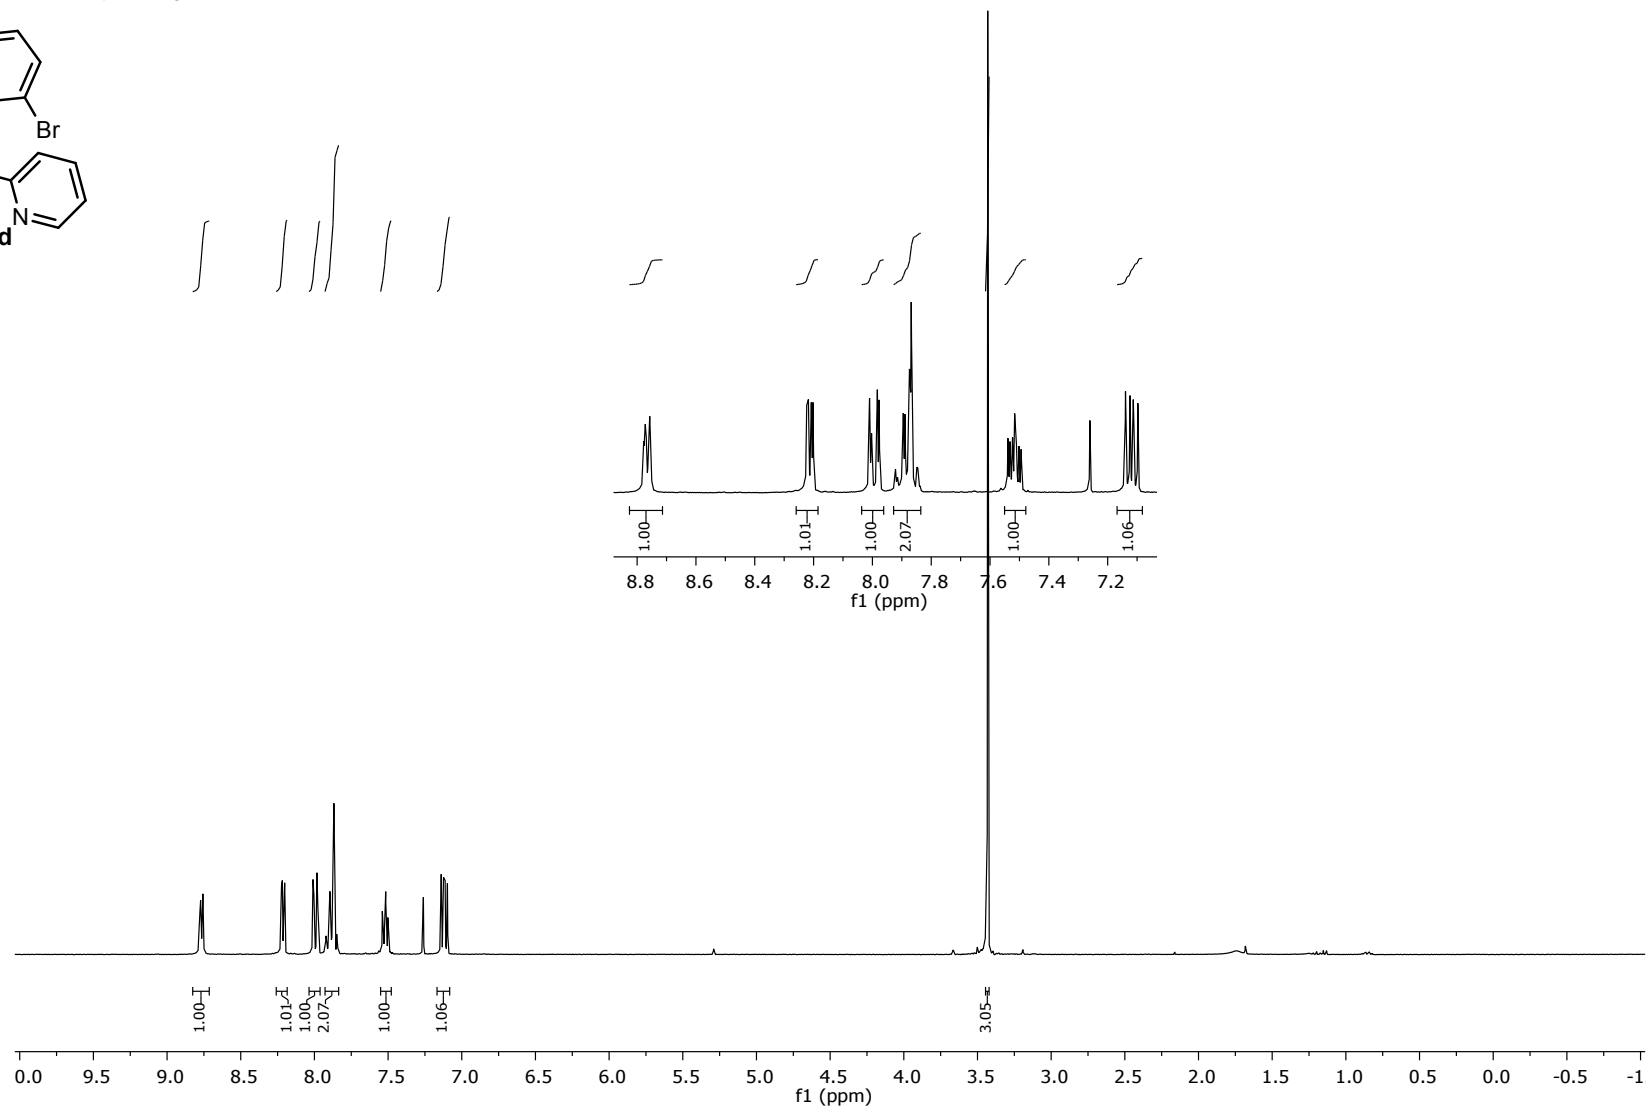

<sup>13</sup>C-NMR 75 MHz, CDCl<sub>3</sub>

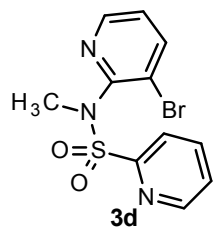

157.3  
152.5  
149.9  
147.6  
142.9  
137.8  
126.8  
124.8  
123.3  
121.1  
38.3

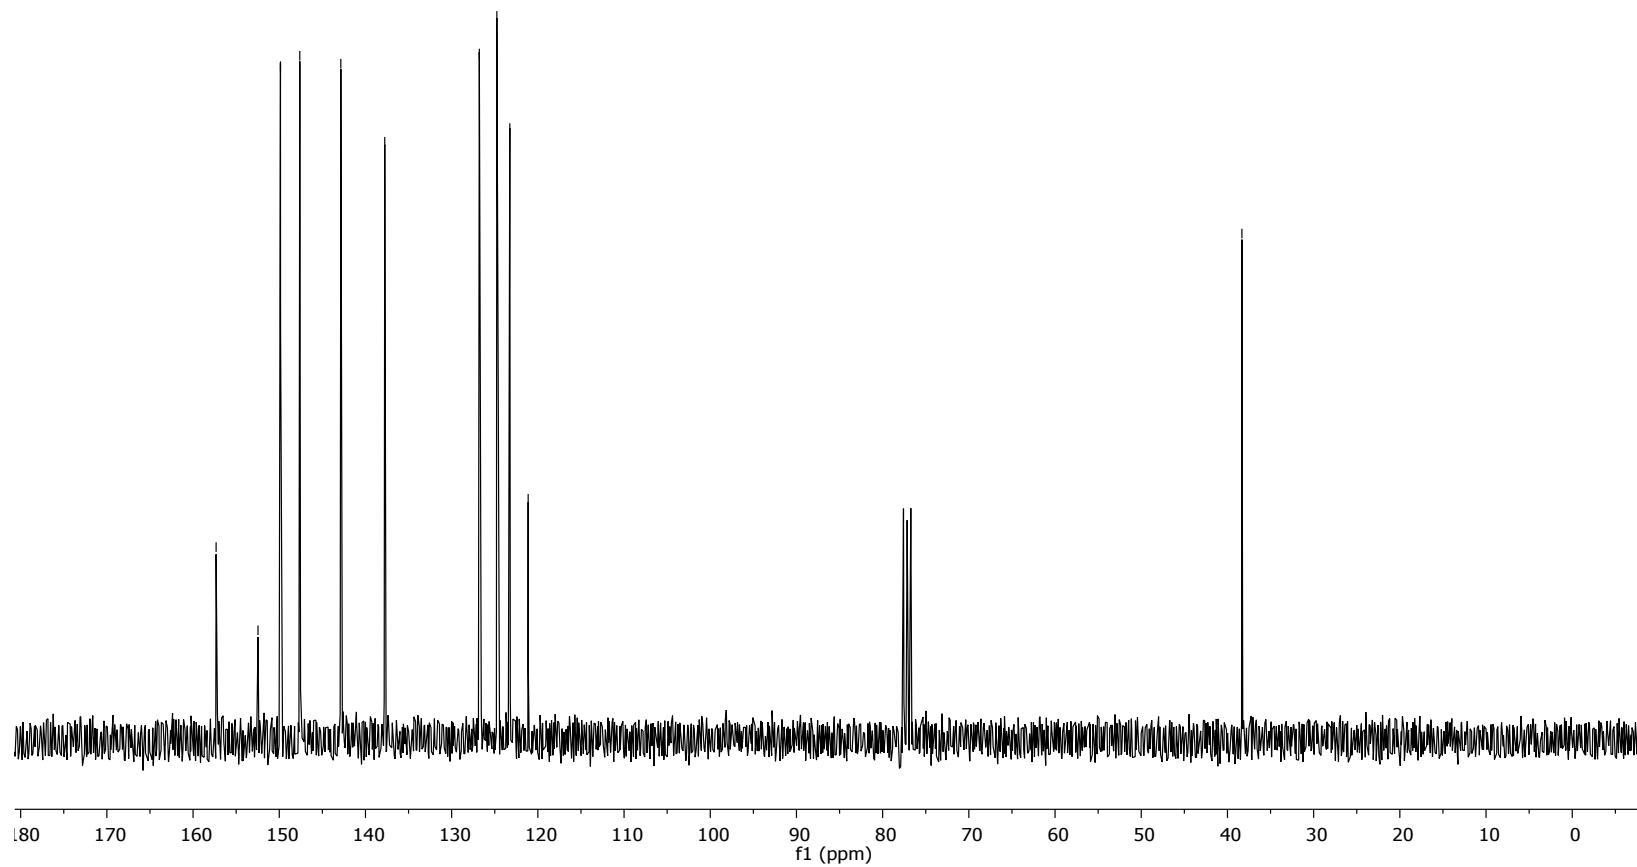



$^1\text{H-NMR}$  300 MHz,  $\text{CDCl}_3$

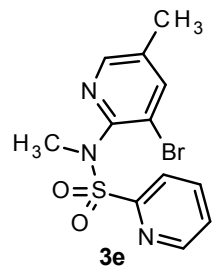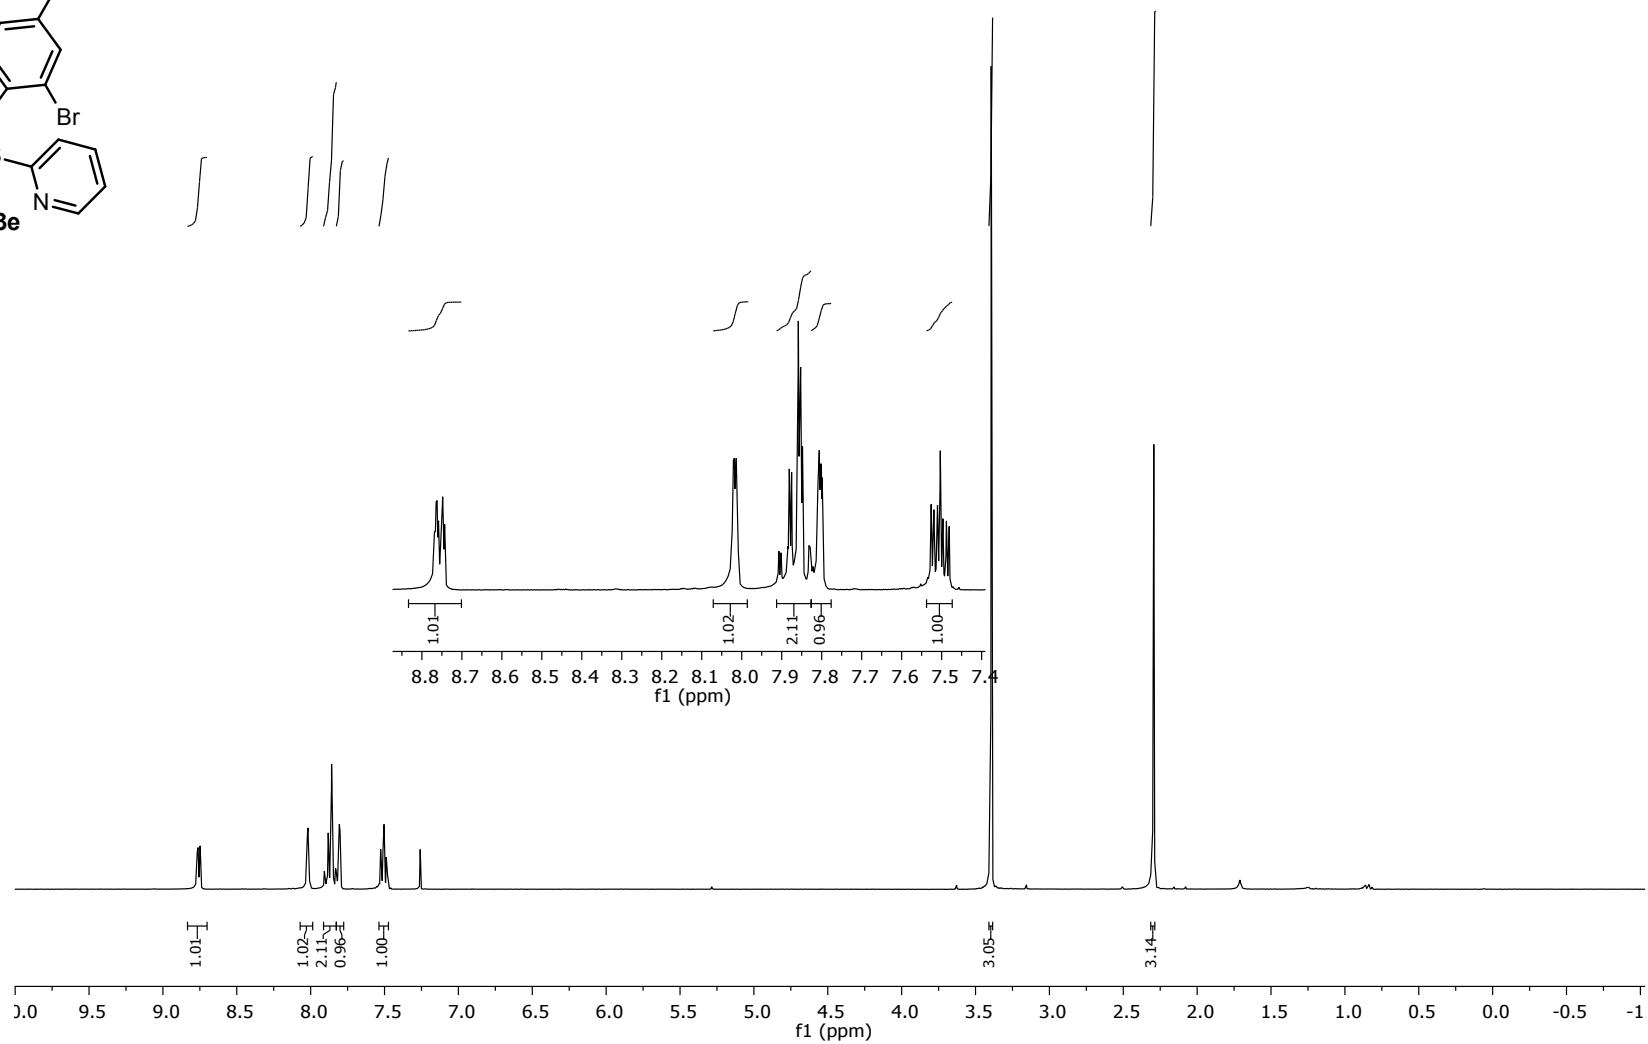

<sup>13</sup>C-NMR 75 MHz, CDCl<sub>3</sub>

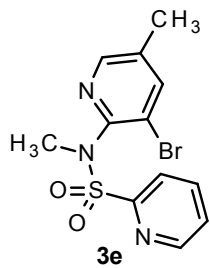

— 157.5  
— 150.1  
— 149.9  
— 148.1  
— 143.1  
— 137.7  
— 135.3  
— 126.7  
— 123.3  
— 120.7

— 38.3

— 17.7

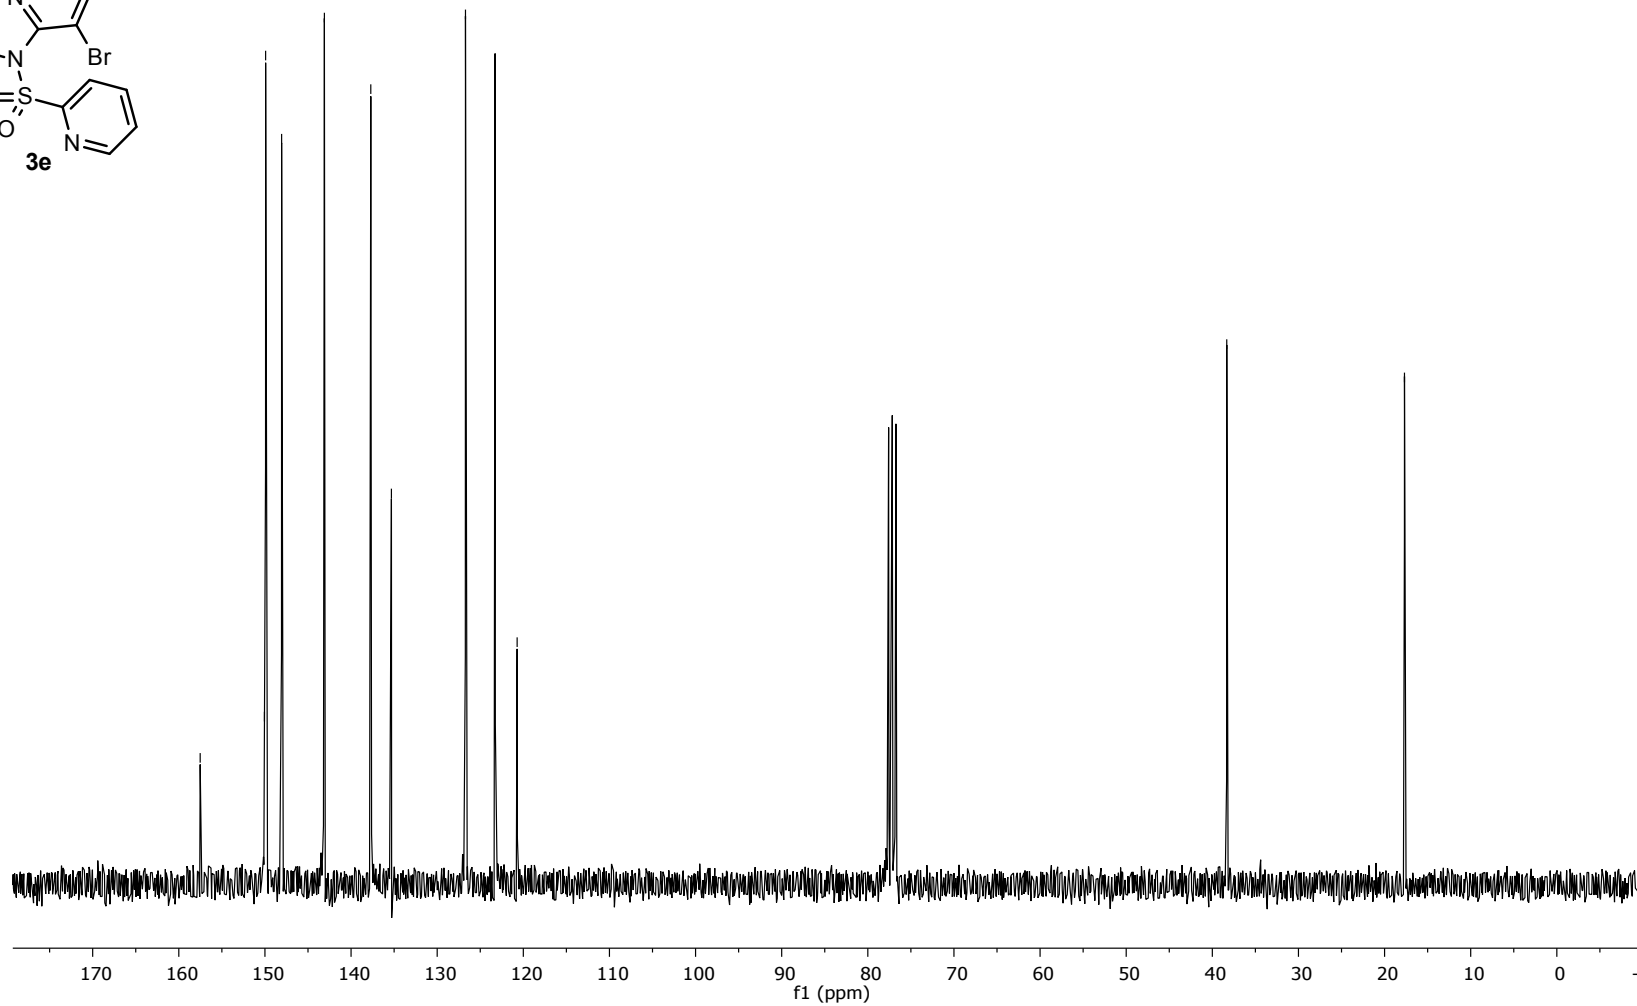

<sup>1</sup>H-NMR 300 MHz, CDCl<sub>3</sub>

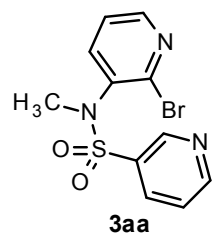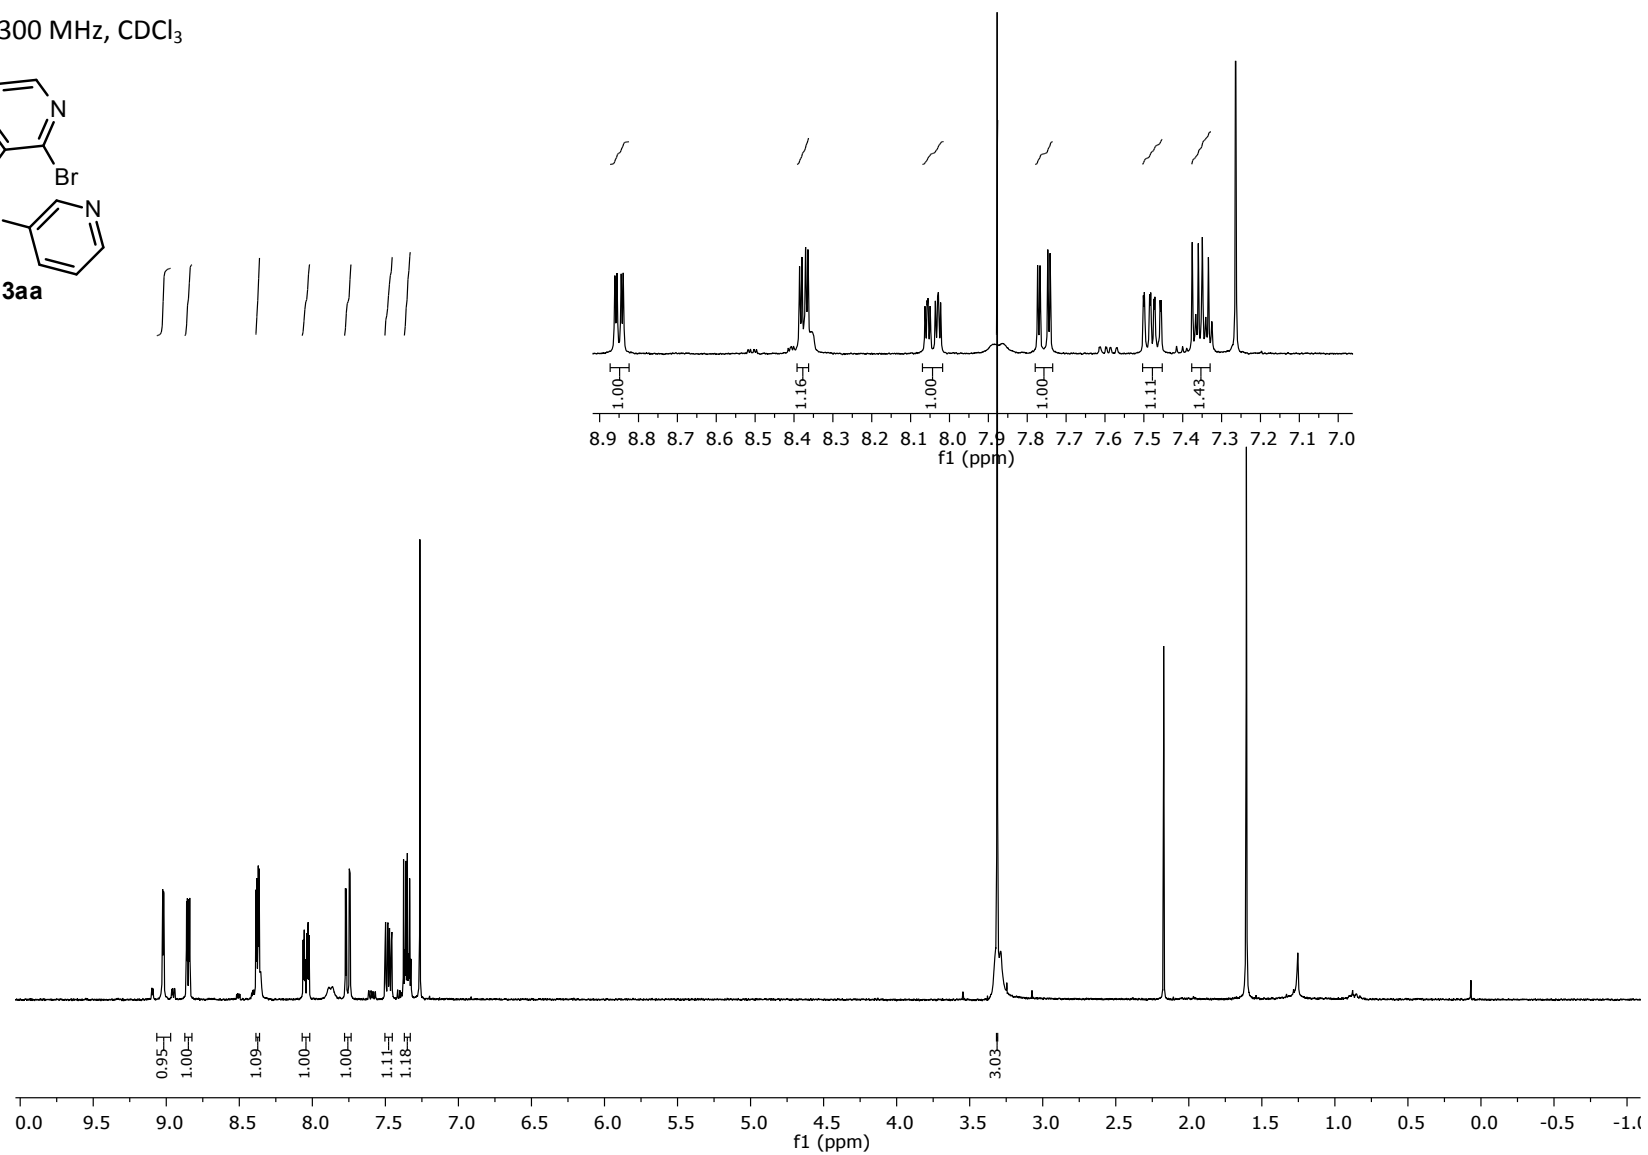

$^{13}\text{C-NMR}$  75 MHz,  $\text{CDCl}_3$

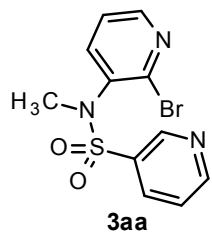

153.7  
149.8  
148.4  
143.1  
140.5  
137.0  
135.7  
135.2  
123.8  
123.4

38.0

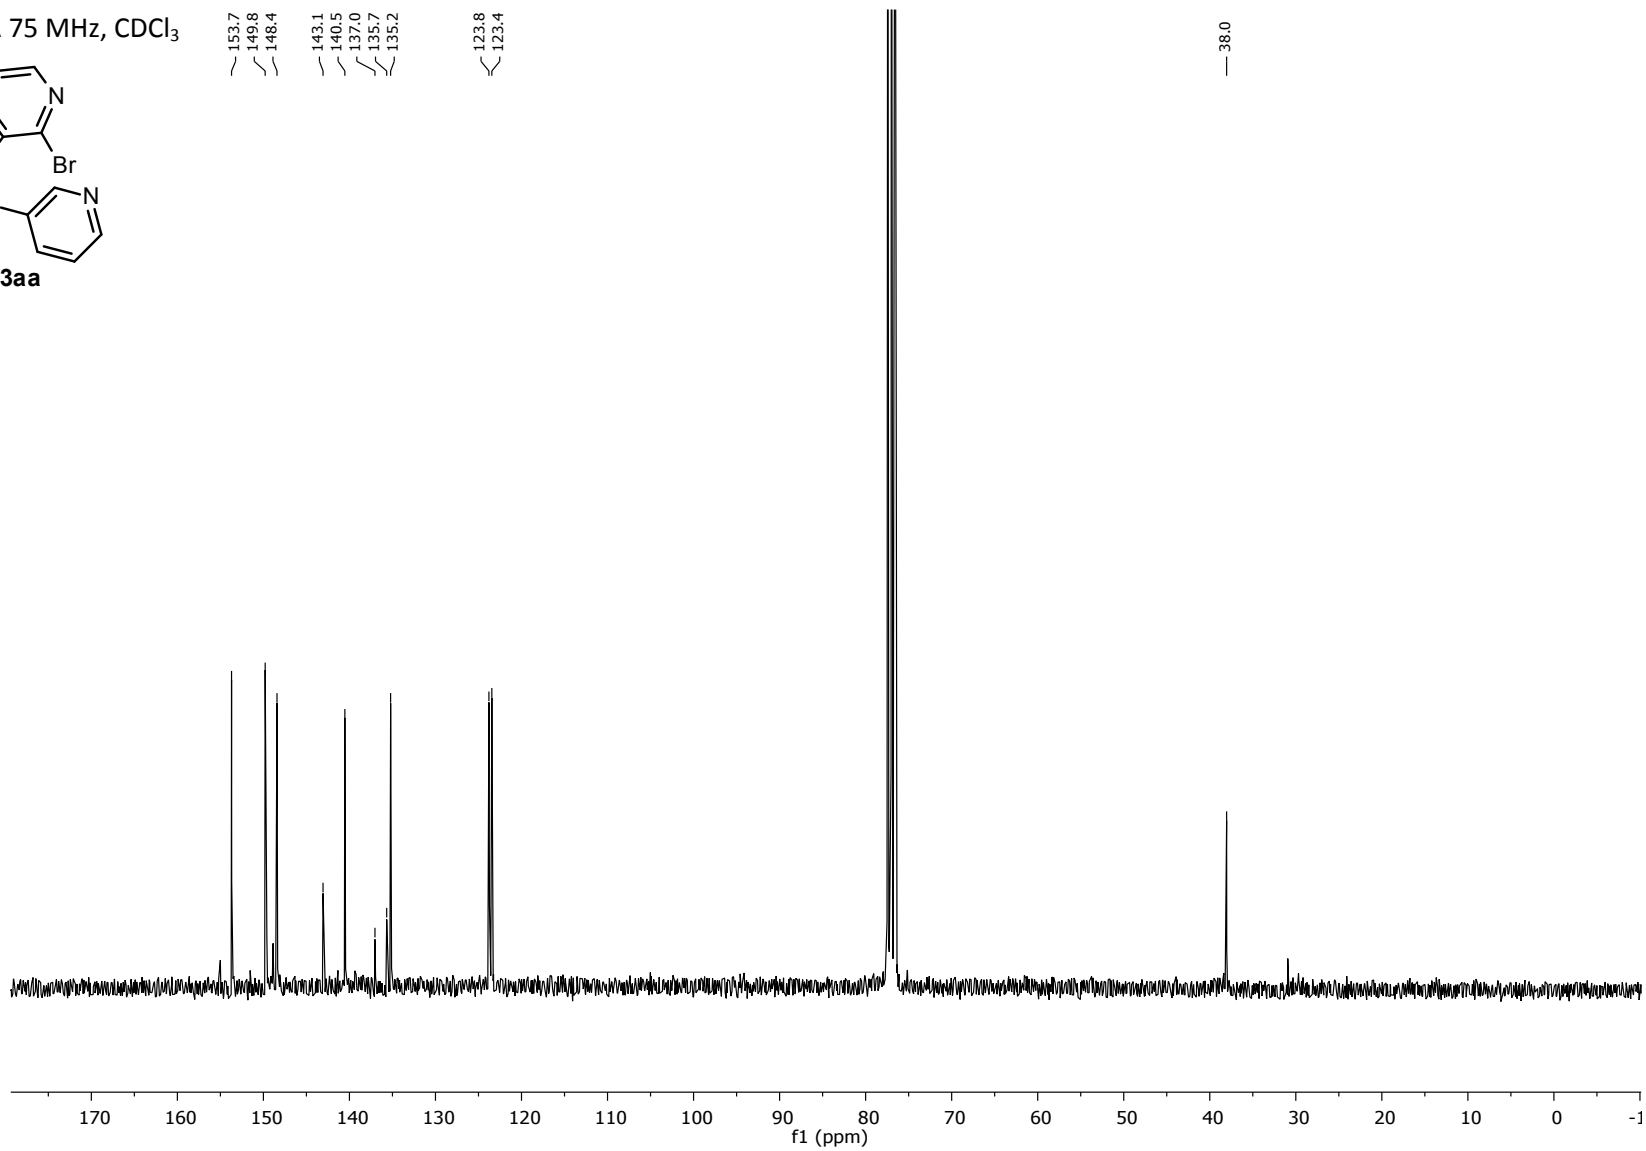

$^1\text{H-NMR}$  500 MHz,  $\text{CDCl}_3$

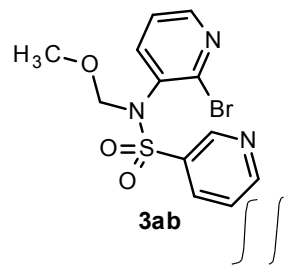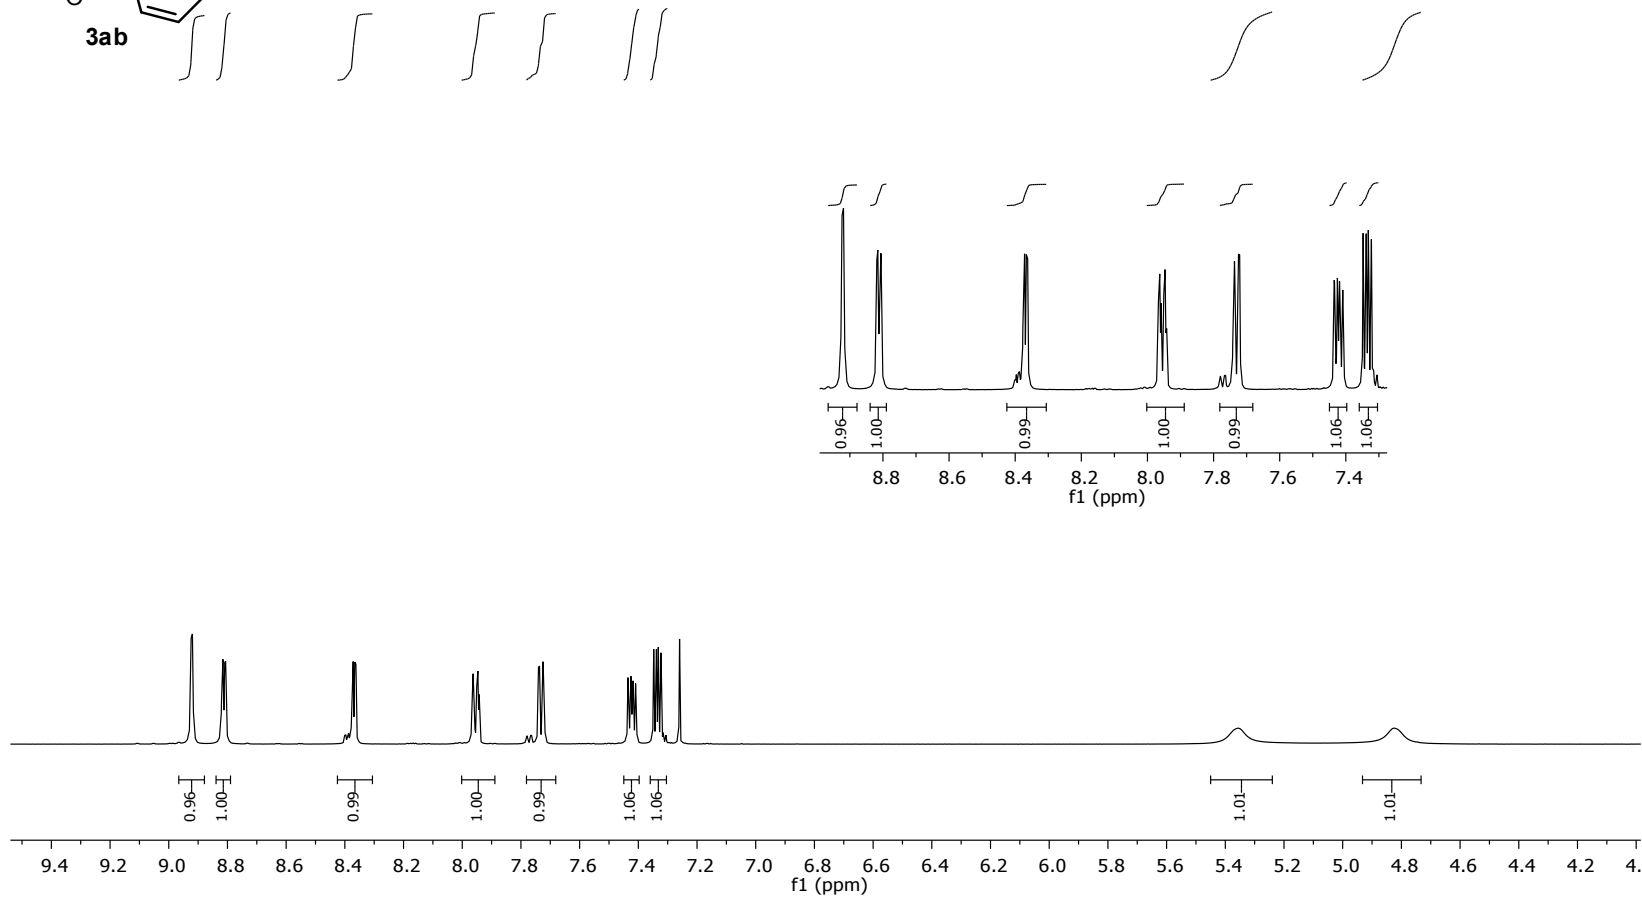

$^{13}\text{C-NMR}$  75 MHz,  $\text{CDCl}_3$

153.7  
150.2  
148.6  
143.8  
142.4  
136.2  
135.3  
133.7  
123.6  
123.3

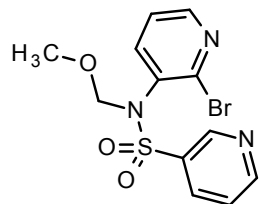

**3ab**

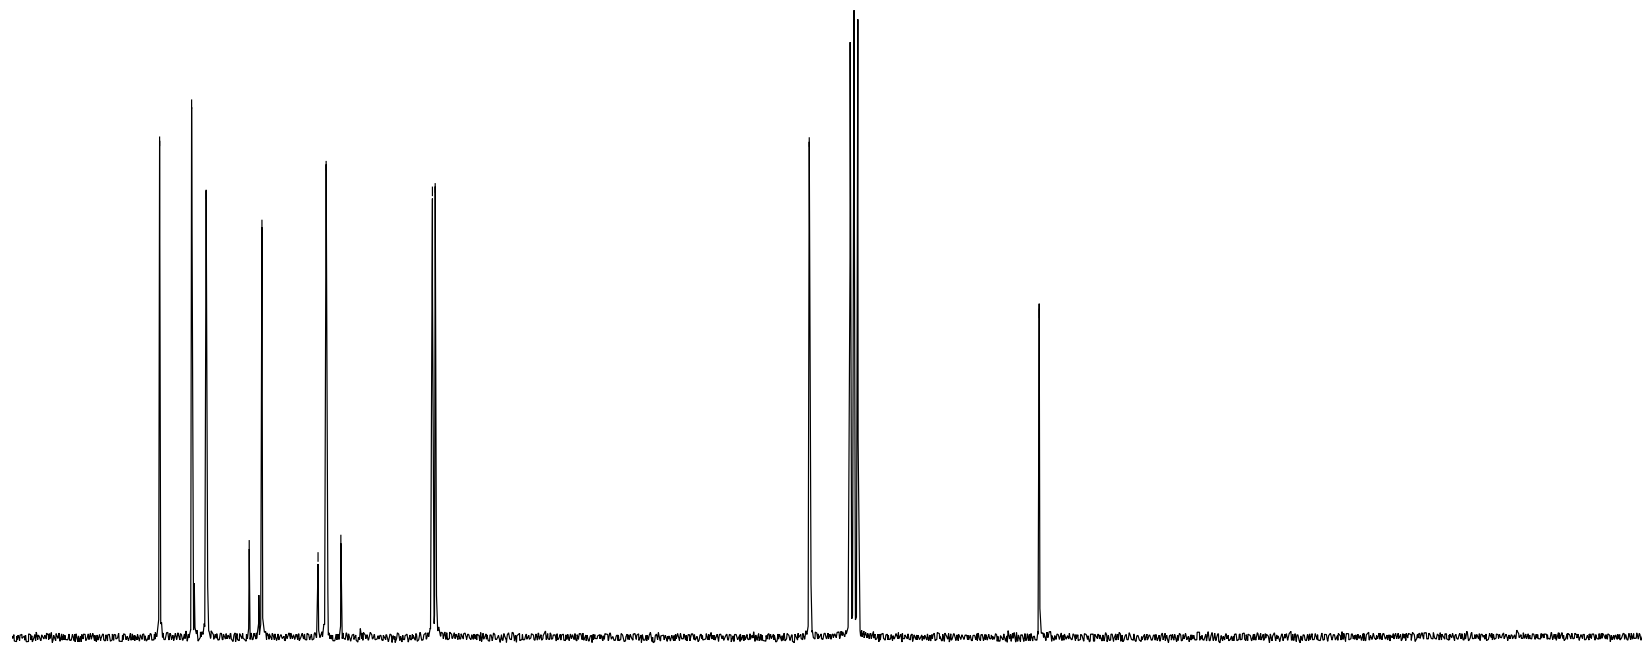

160 150 NMR 140 130 120 110 100 90 80 70 60 50 40 30 20 10 0 -1  
f1 (ppm)

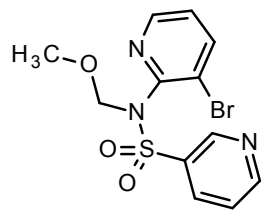

**3bb**

S30



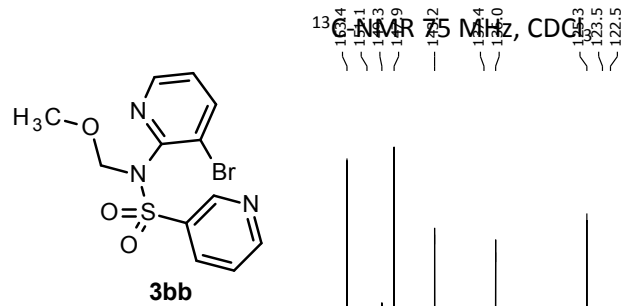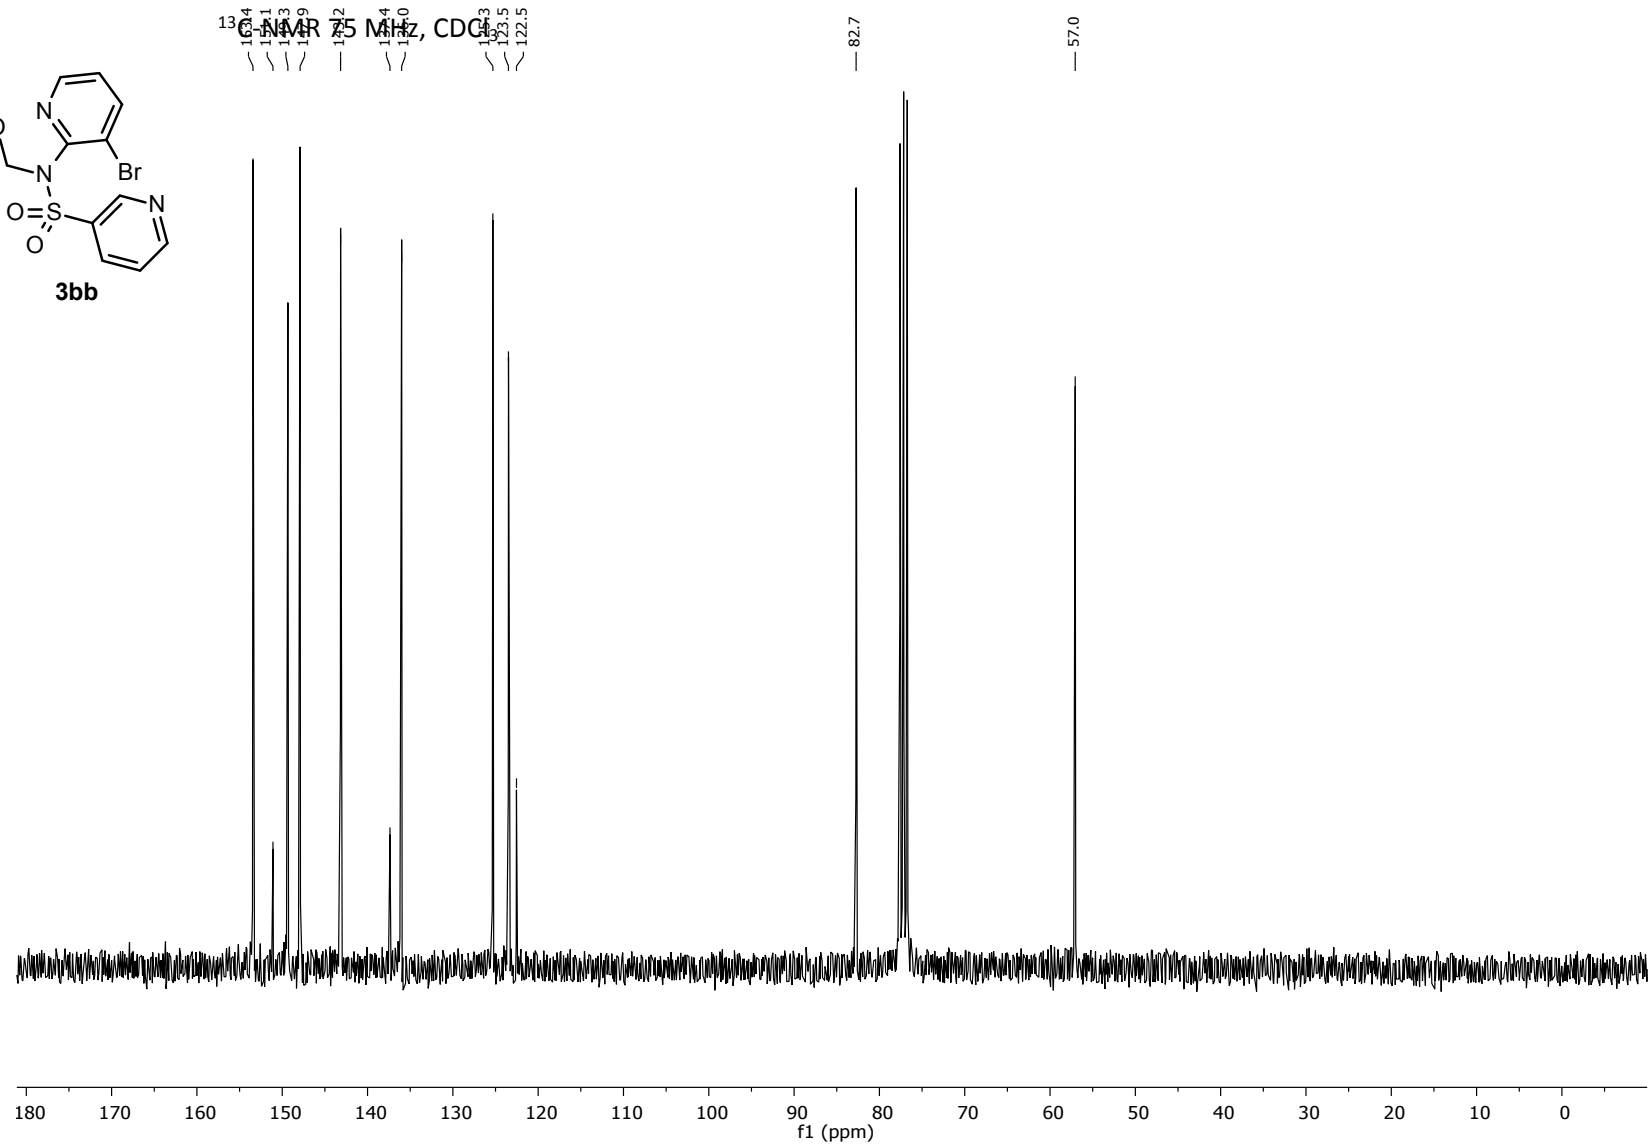



$^1\text{H-NMR}$  300 MHz,  $\text{CDCl}_3$

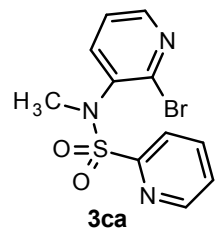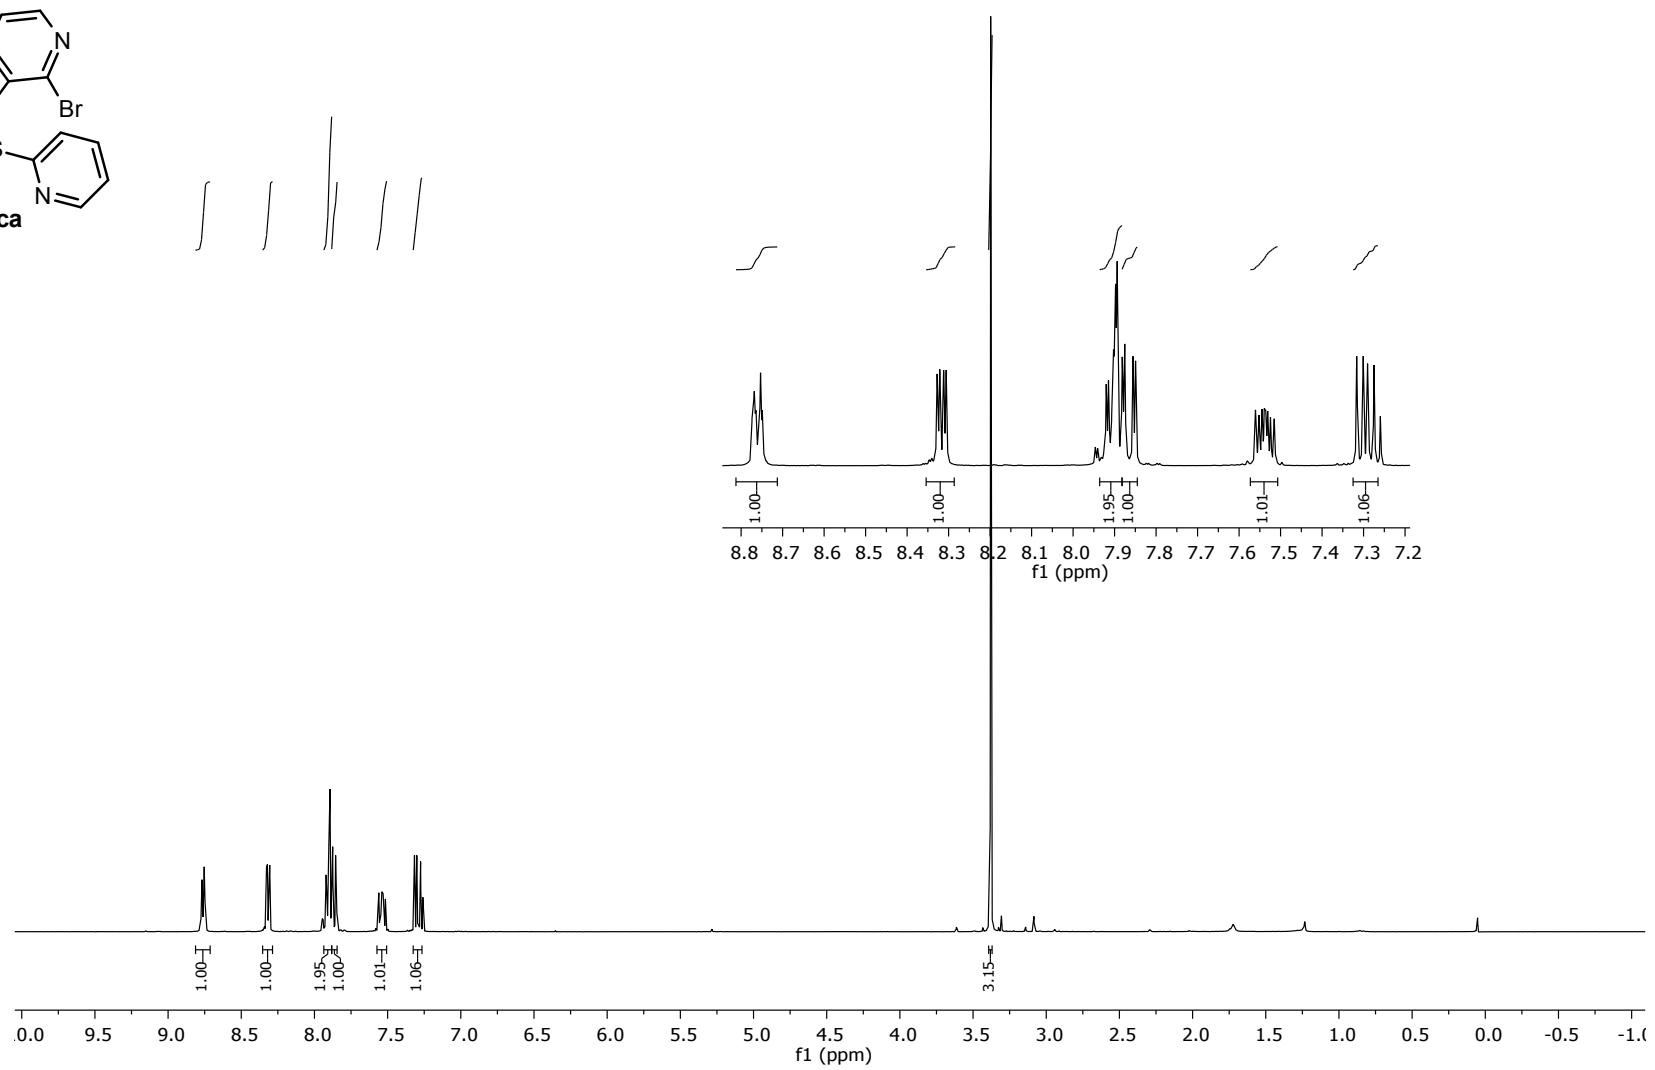

$^{13}\text{C-NMR}$  75 MHz,  $\text{CDCl}_3$

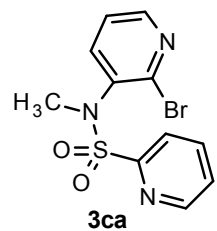

157.2  
150.3  
149.5  
144.0  
140.3  
138.3  
137.9  
127.2  
123.5  
123.0  
39.0

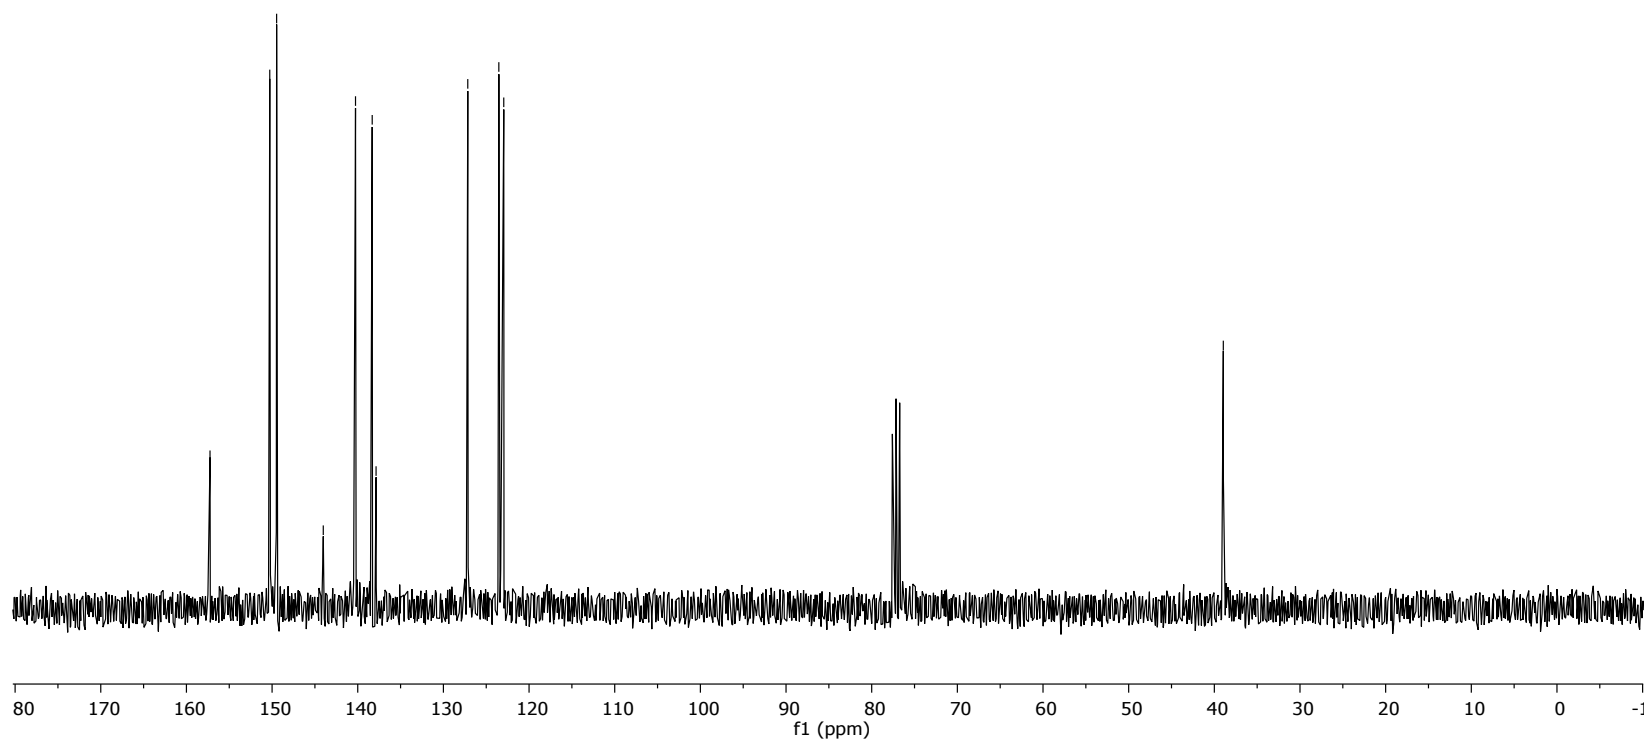

<sup>1</sup>H-NMR 300 MHz, CDCl<sub>3</sub>

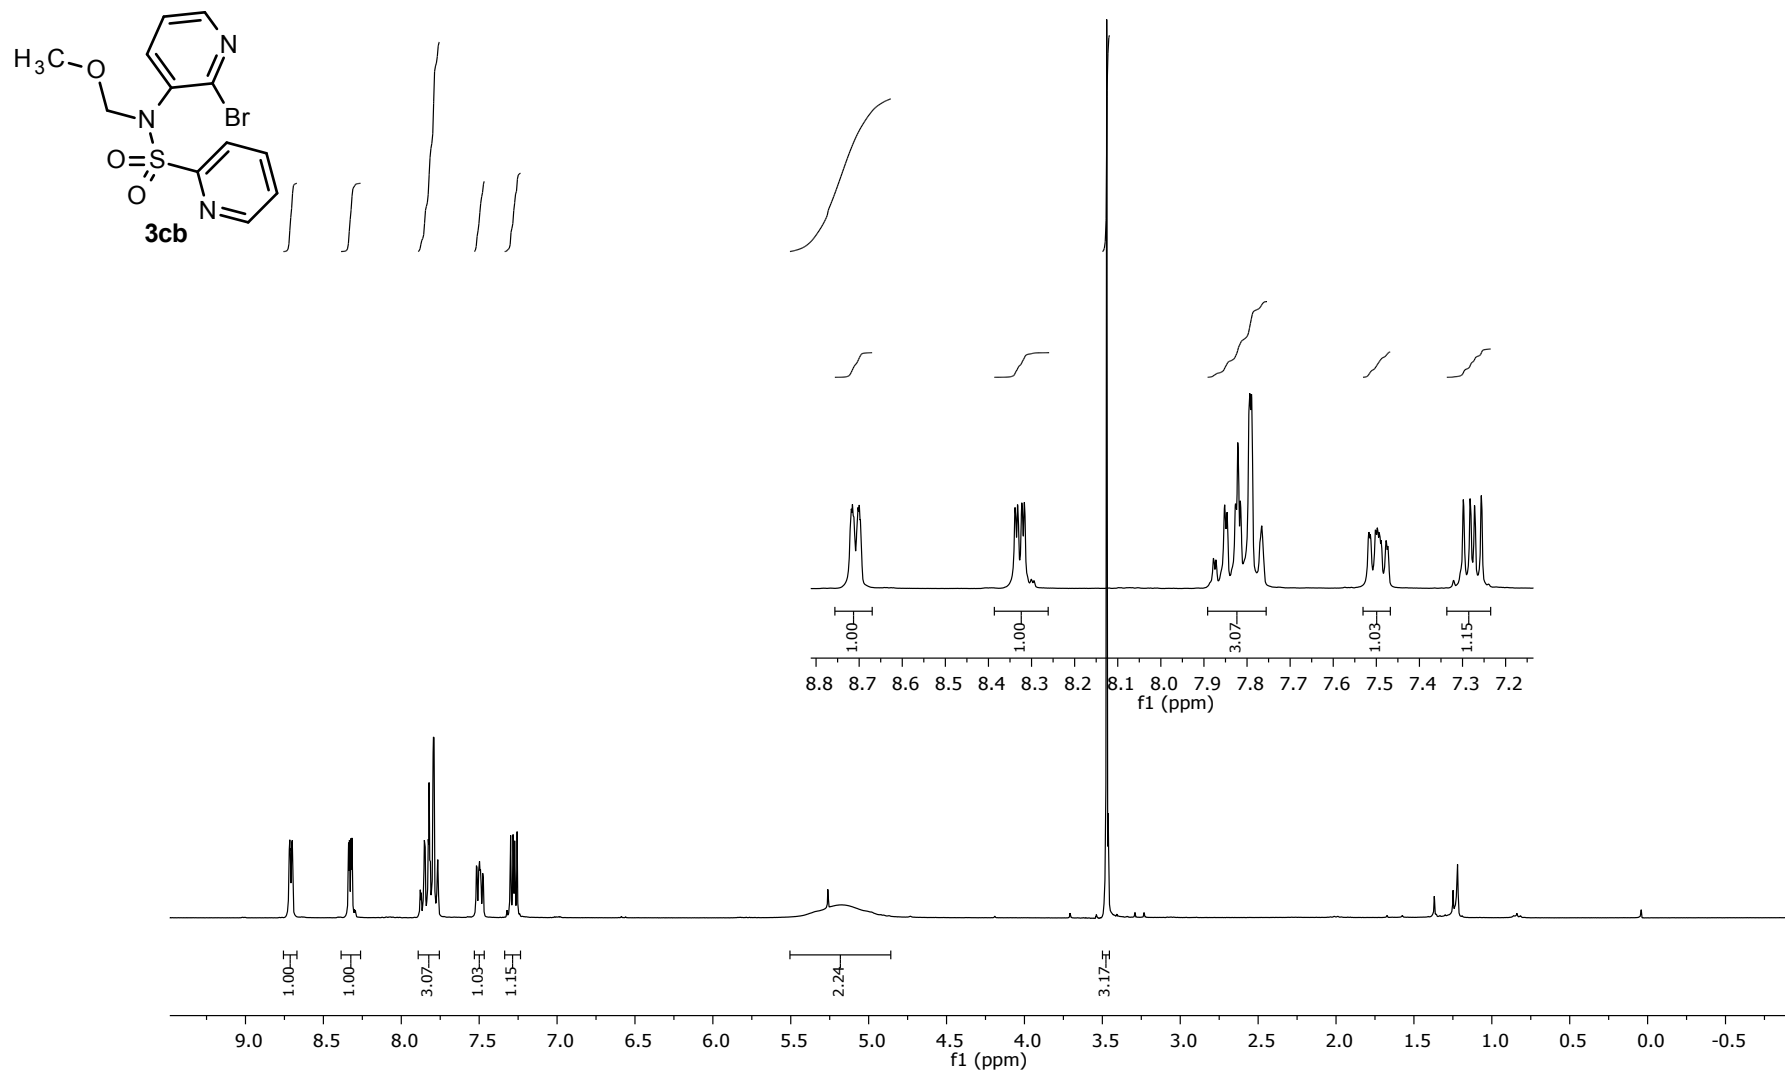

<sup>13</sup>C-NMR 75 MHz, CDCl<sub>3</sub>

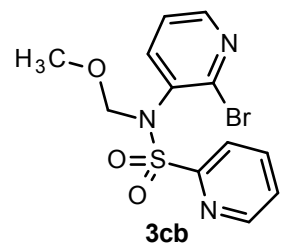

— 157.4  
/ 151.0  
\ 150.3  
/ 149.6  
— 142.8  
— 138.2  
— 132.4  
— 127.2  
/ 123.2  
\ 122.5

— 82.8

— 56.6

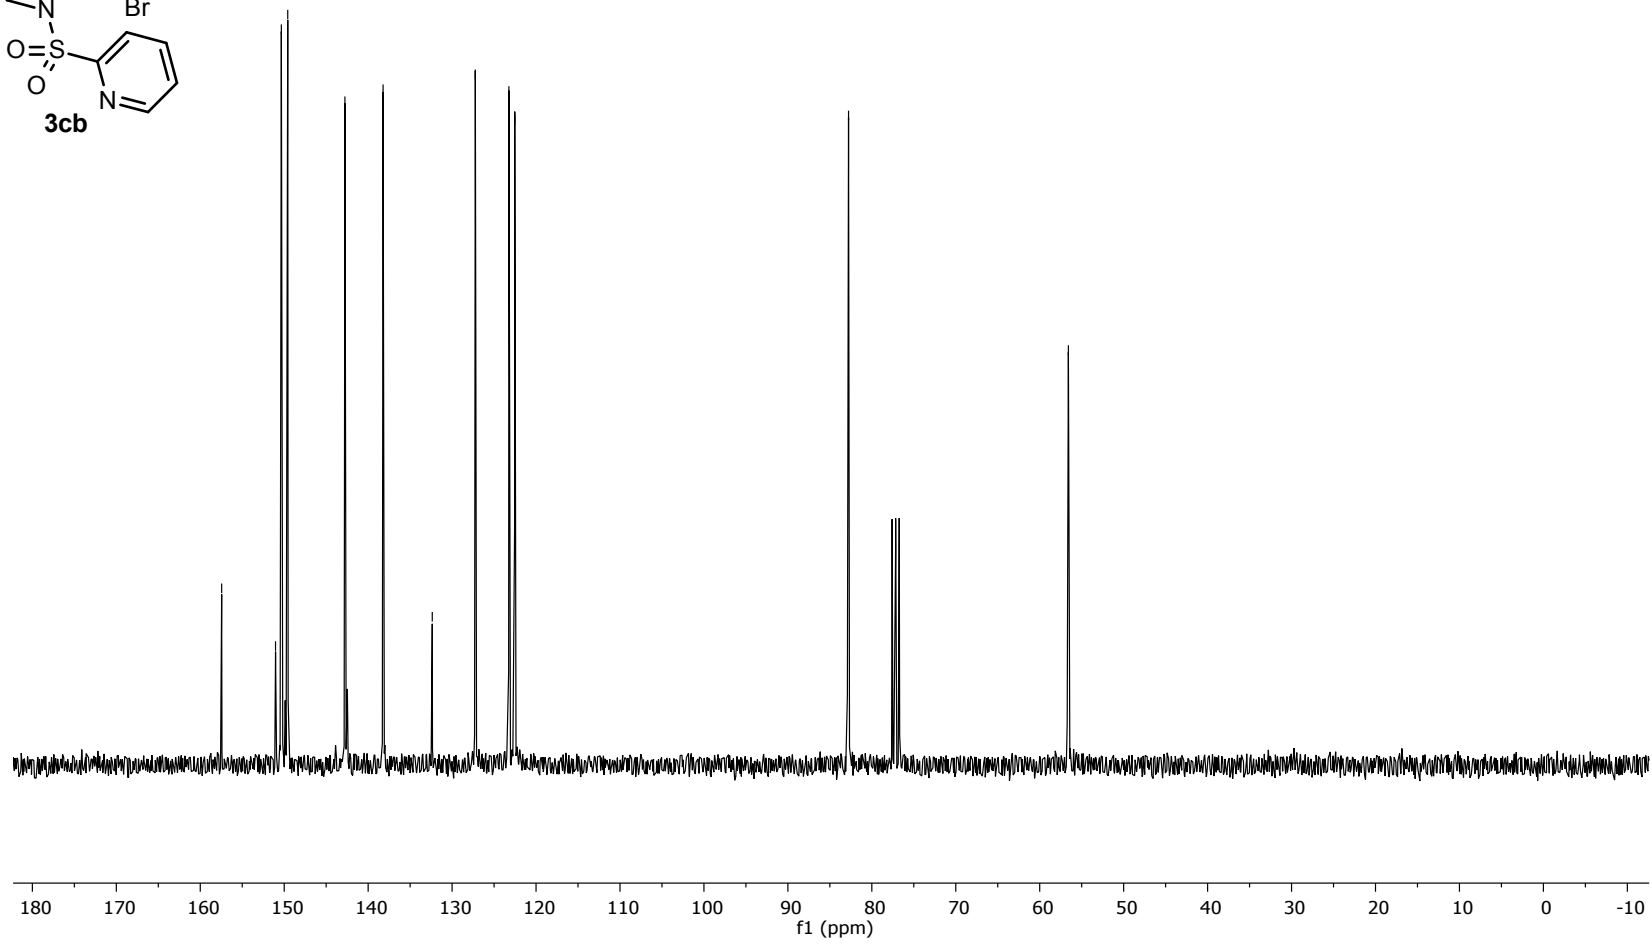

$^1\text{H-NMR}$  300 MHz,  $\text{CDCl}_3$

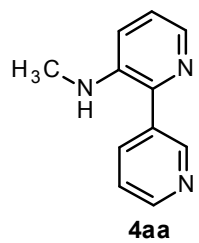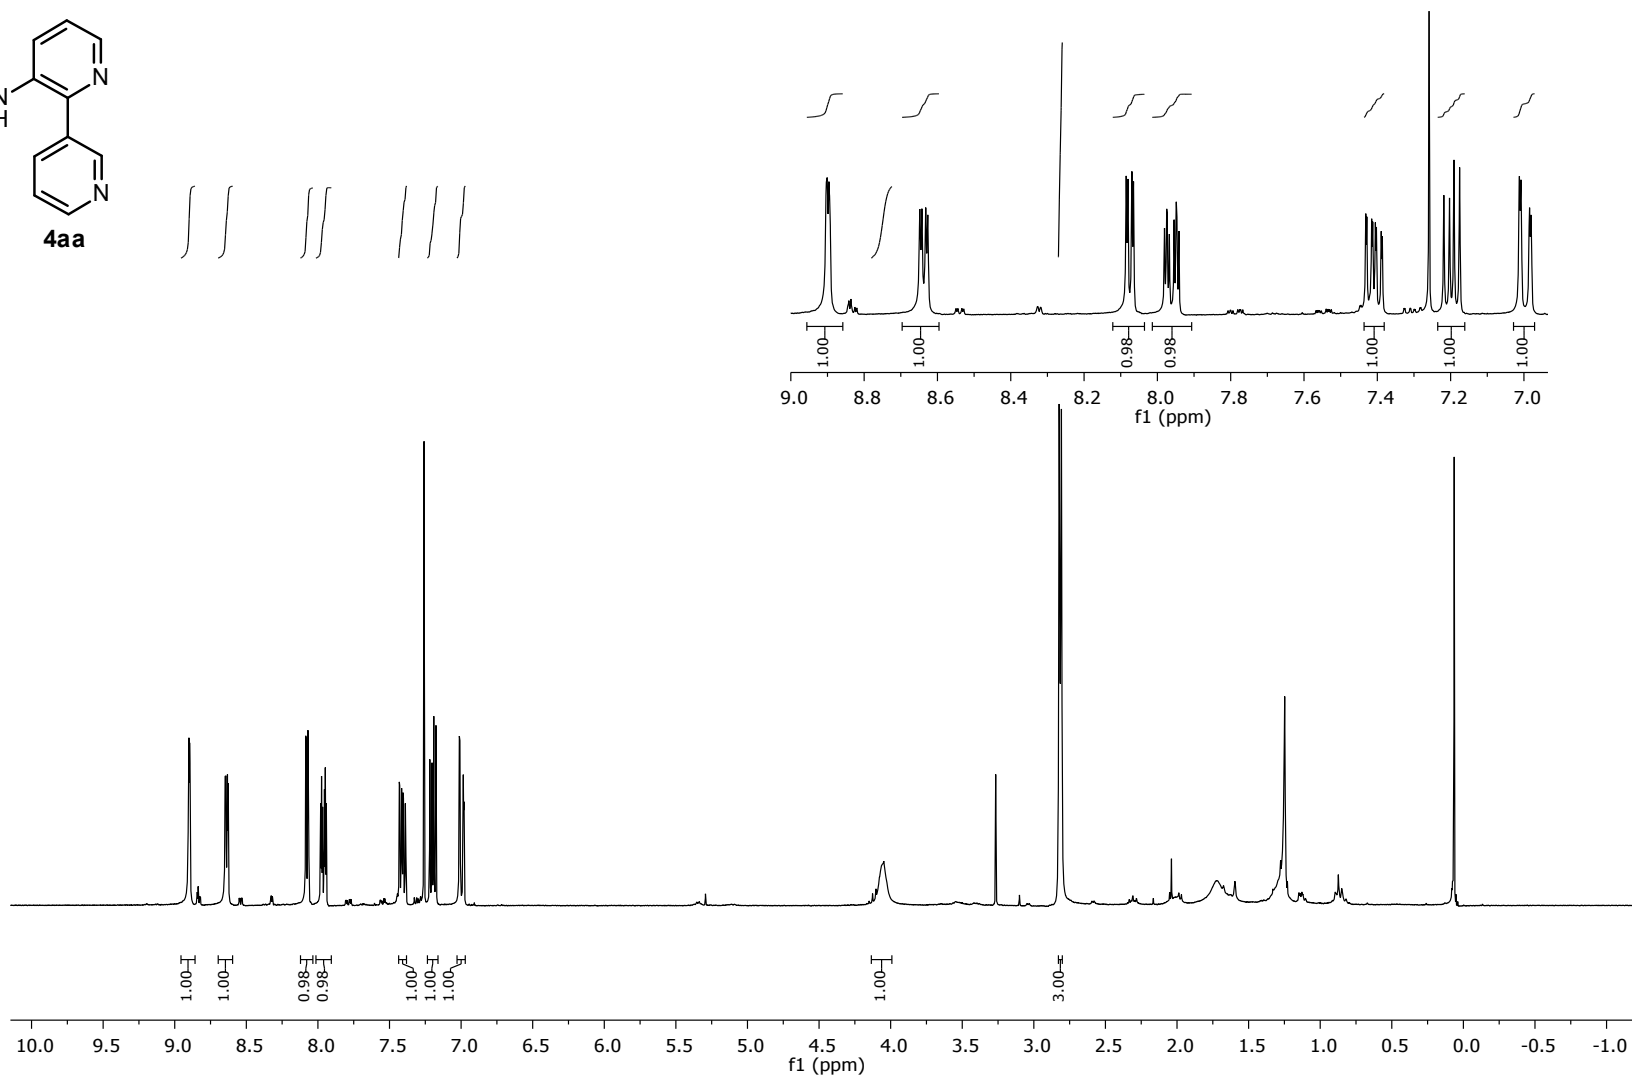

<sup>13</sup>C-NMR 75 MHz, CDCl<sub>3</sub>

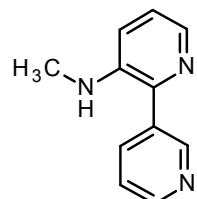

**4aa**

149.7  
149.4  
143.1  
142.3  
138.3  
136.6  
134.5  
123.9  
123.8  
117.1

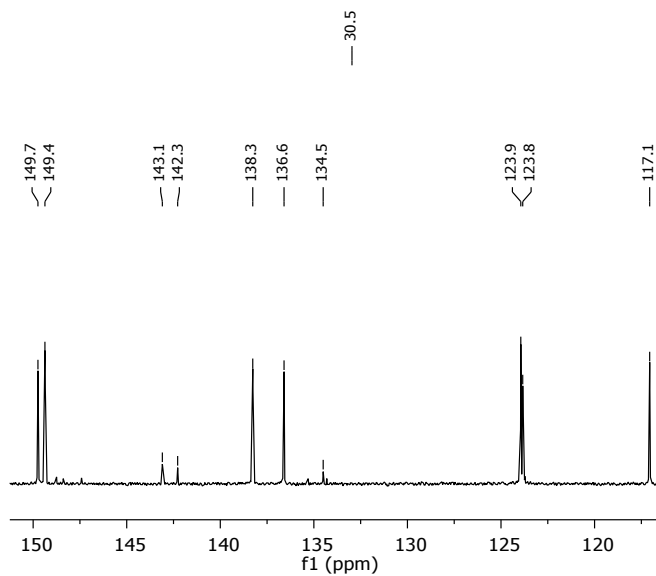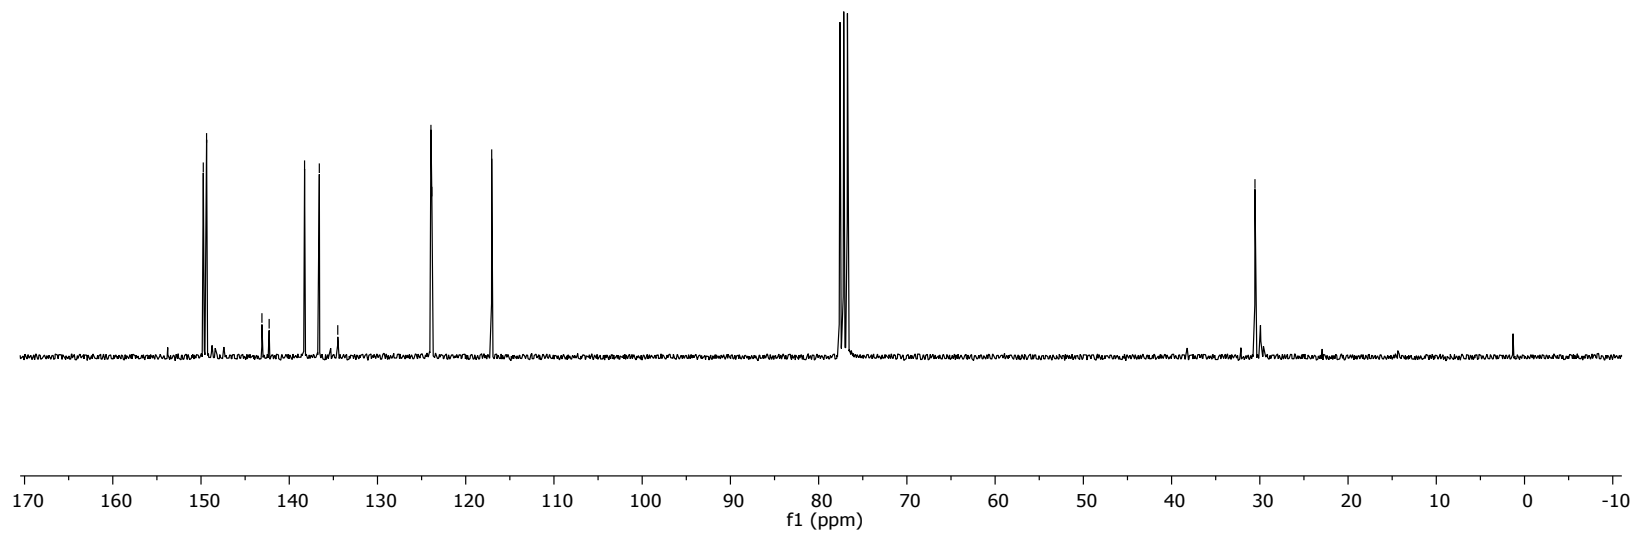

$^1\text{H-NMR}$  300 MHz,  $\text{CDCl}_3$

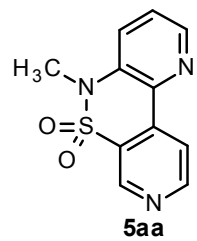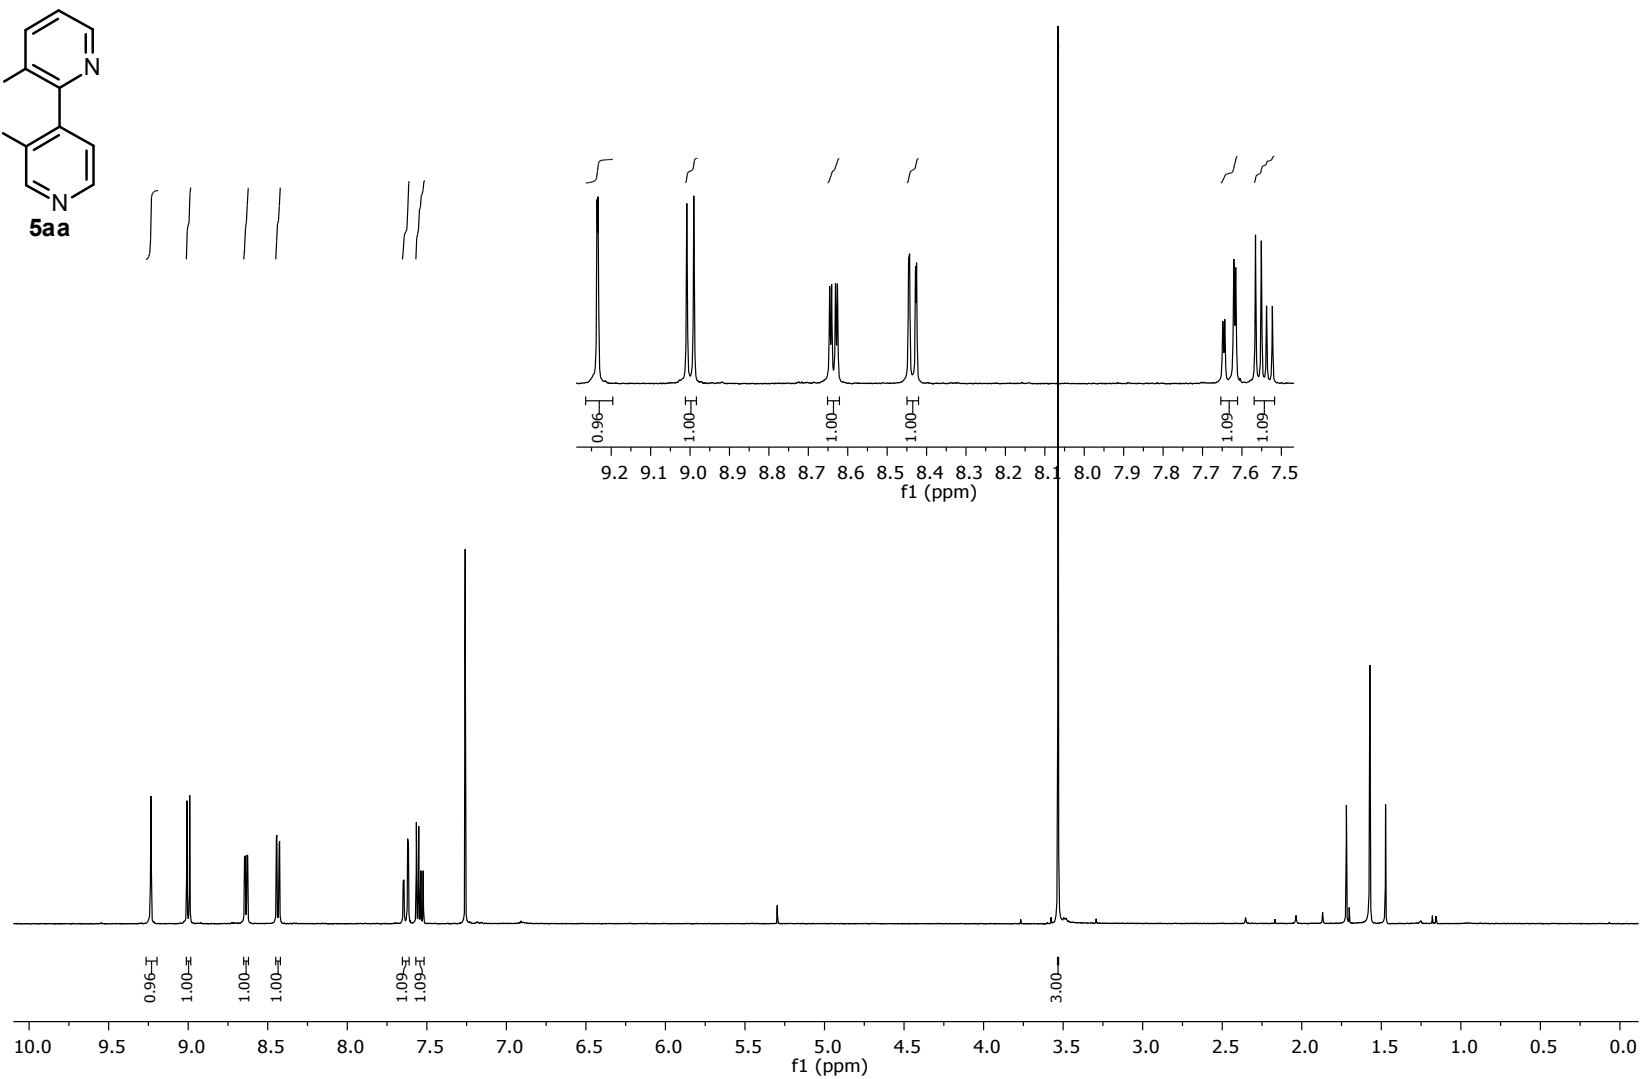

<sup>13</sup>C-NMR 75 MHz, CDCl<sub>3</sub>

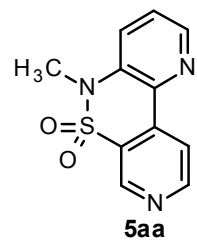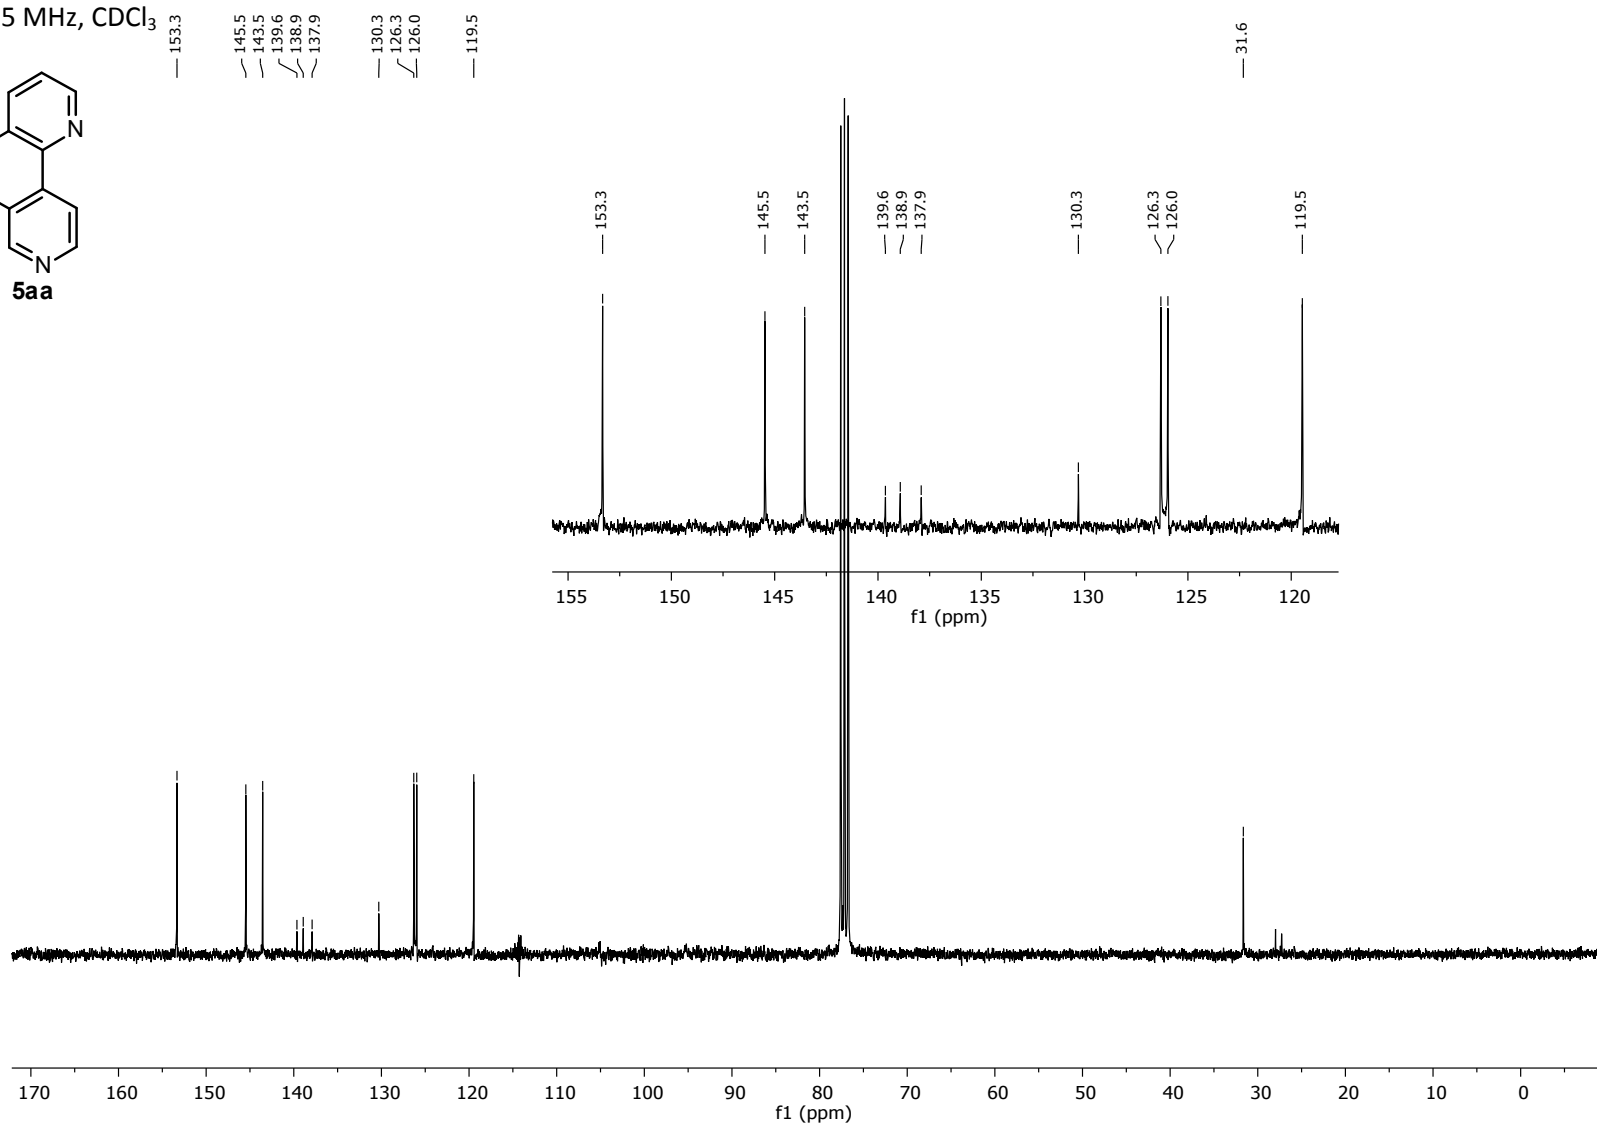



$^1\text{H-NMR}$  300 MHz,  $\text{CDCl}_3$

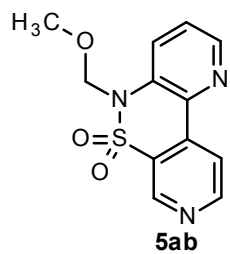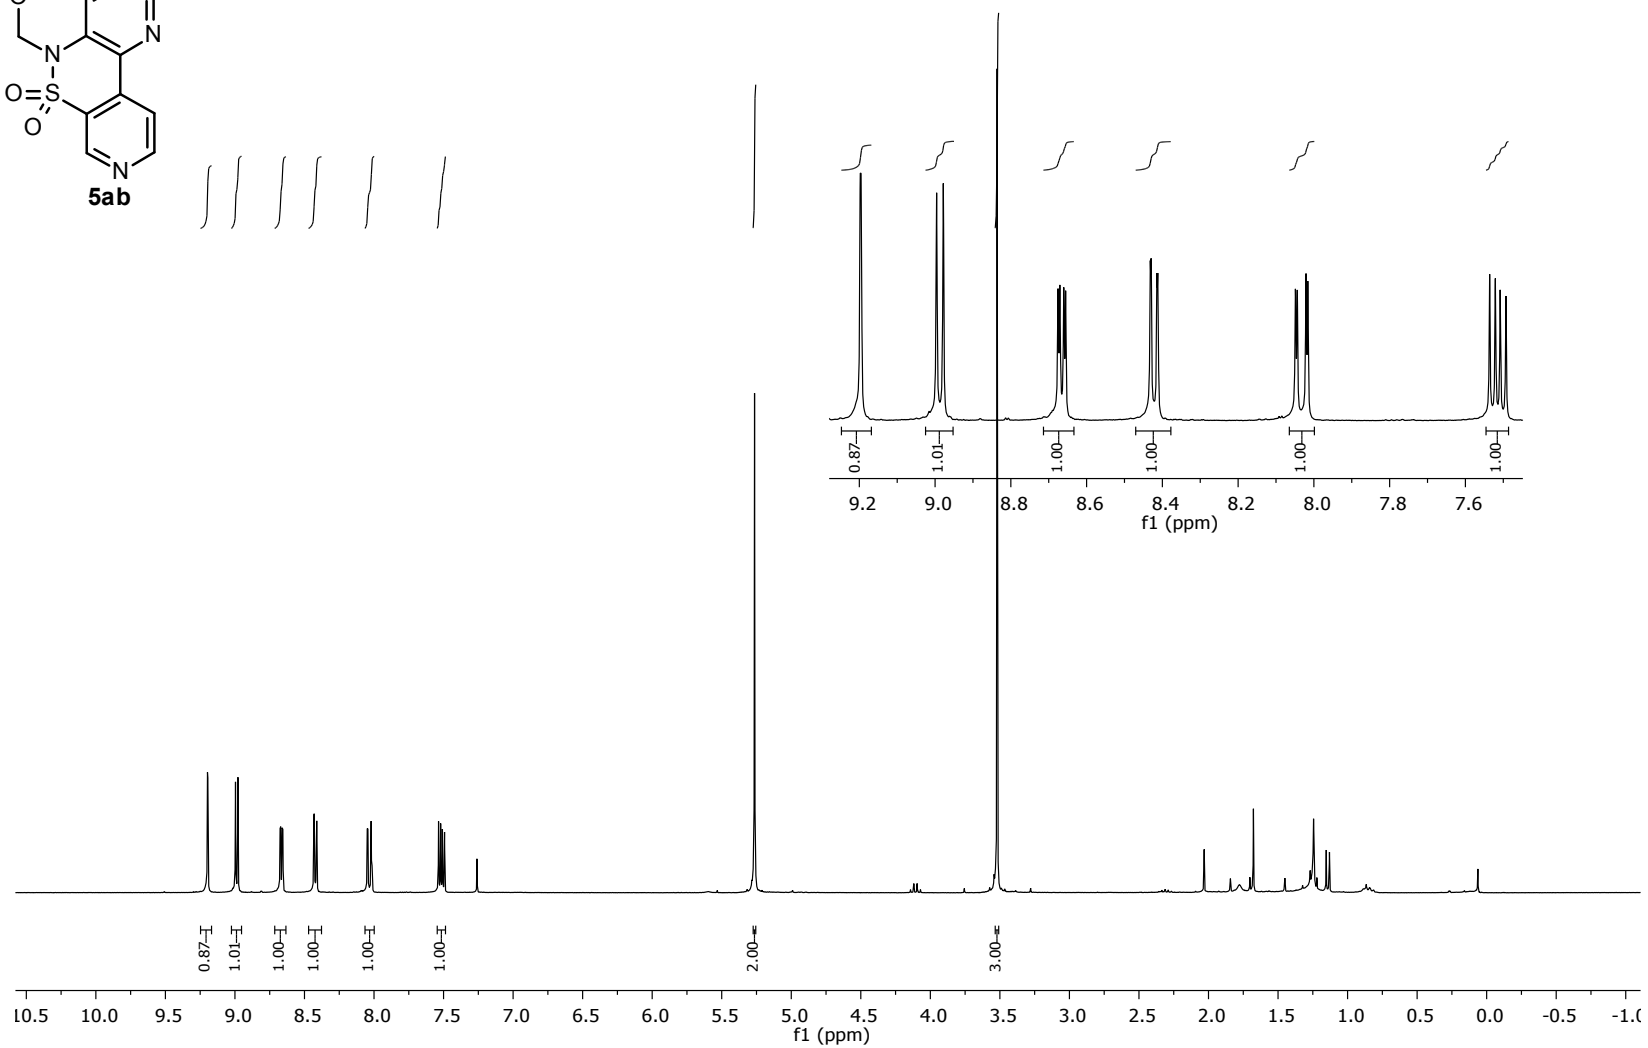

$^{13}\text{C}$ -NMR 75 MHz,  $\text{CDCl}_3$

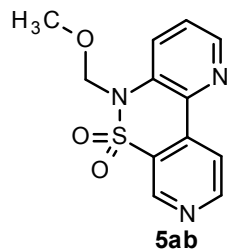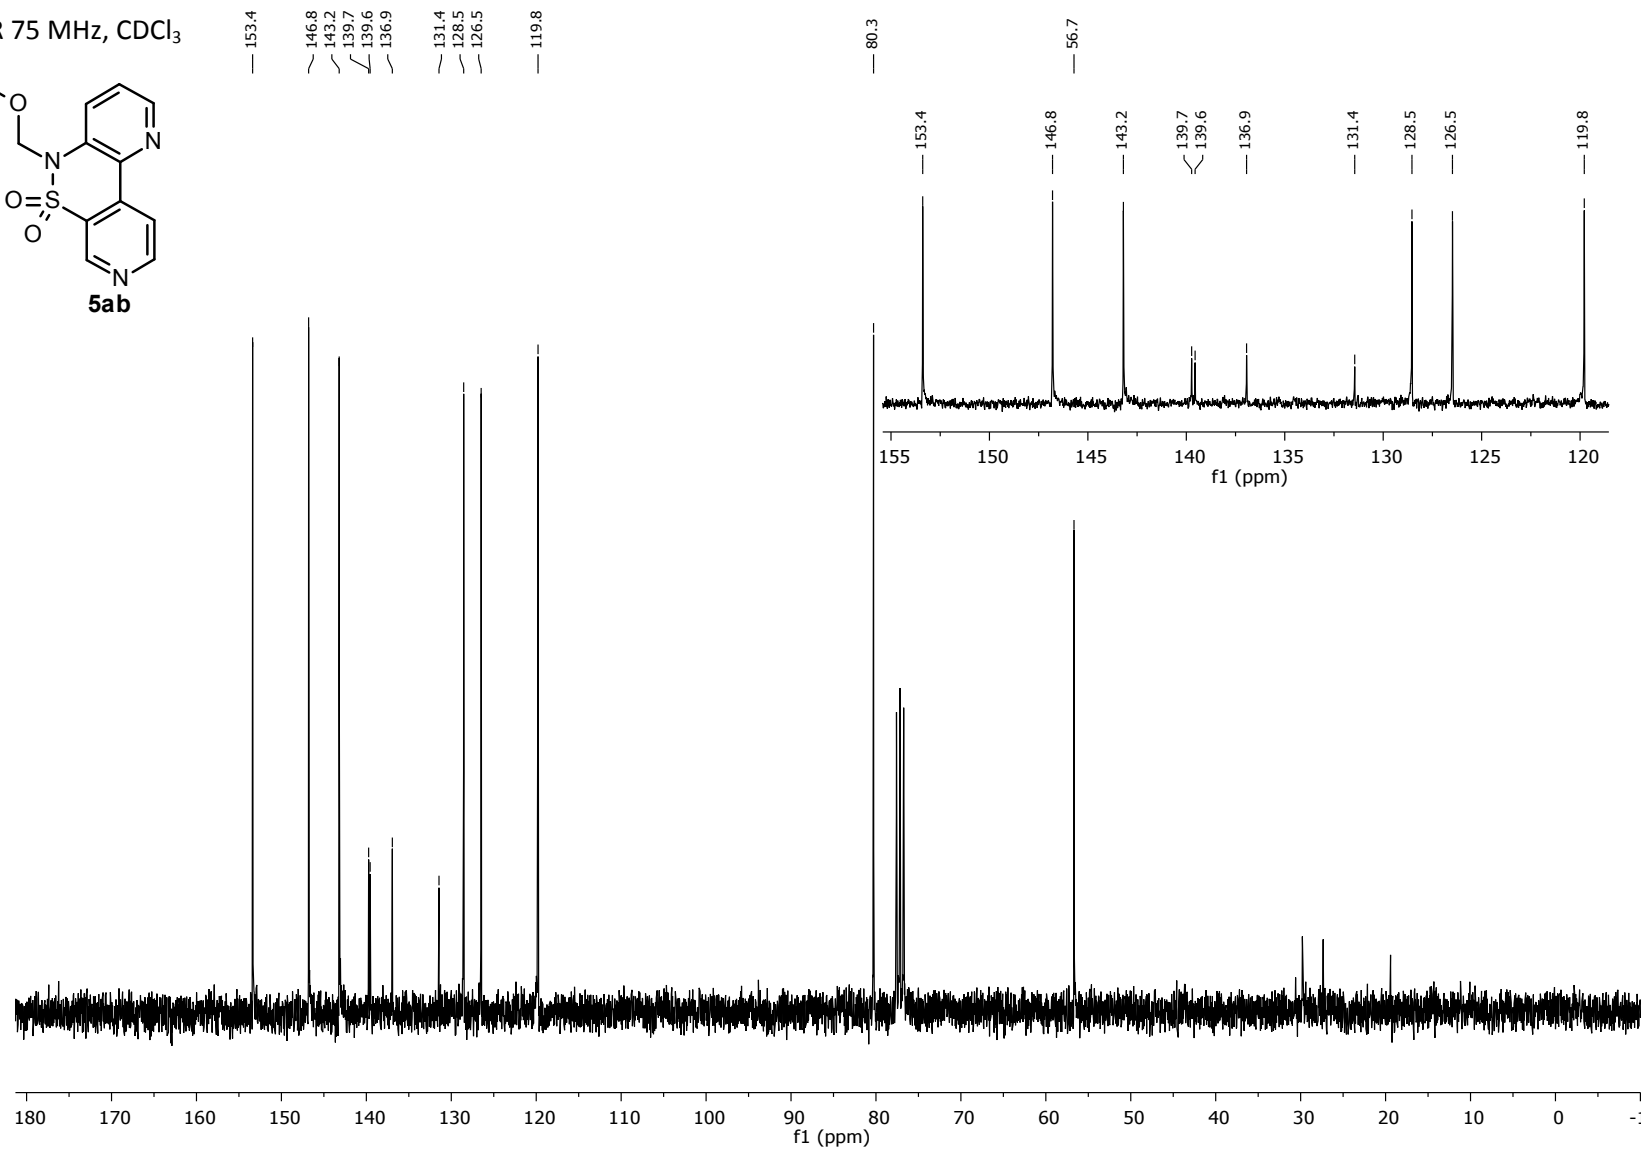

$^1\text{H-NMR}$  300 MHz,  $\text{CDCl}_3$

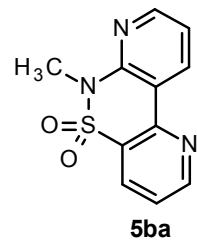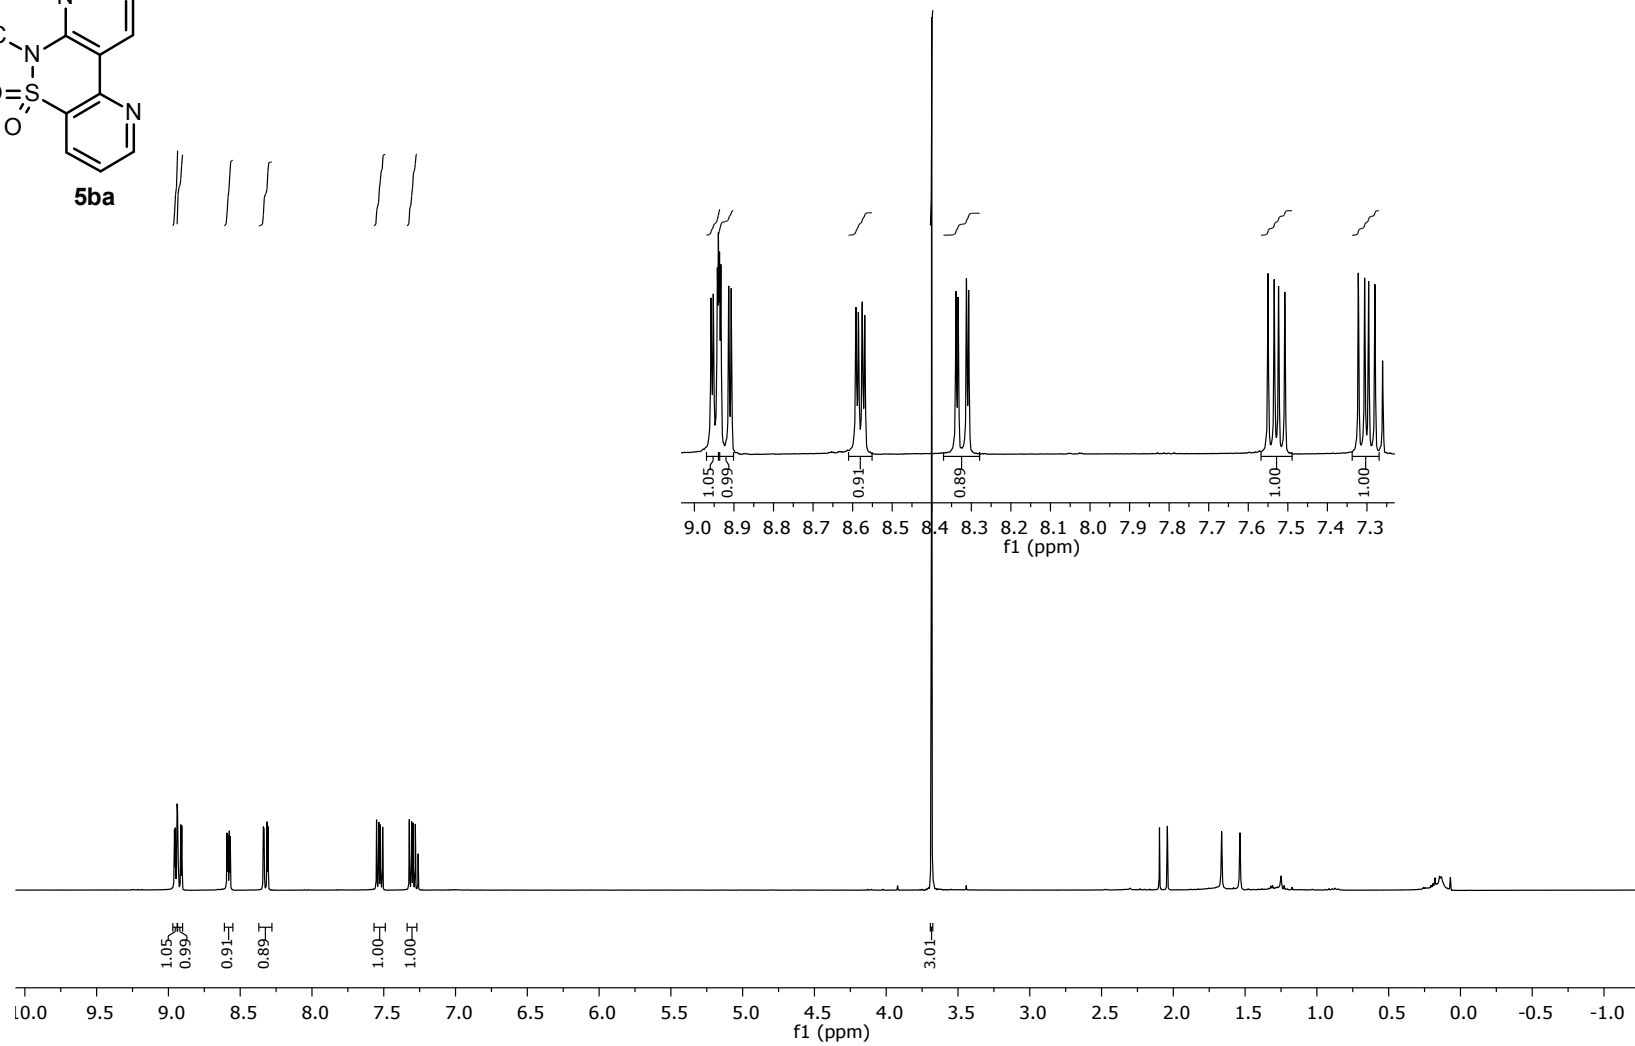

$^{13}\text{C-NMR}$  75 MHz,  $\text{CDCl}_3$

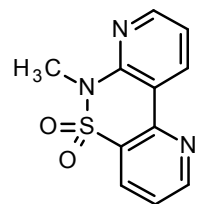

**5ba**

153.2  
150.8  
150.0  
147.1

135.3  
130.5  
129.8

123.1  
119.4  
118.4

28.6

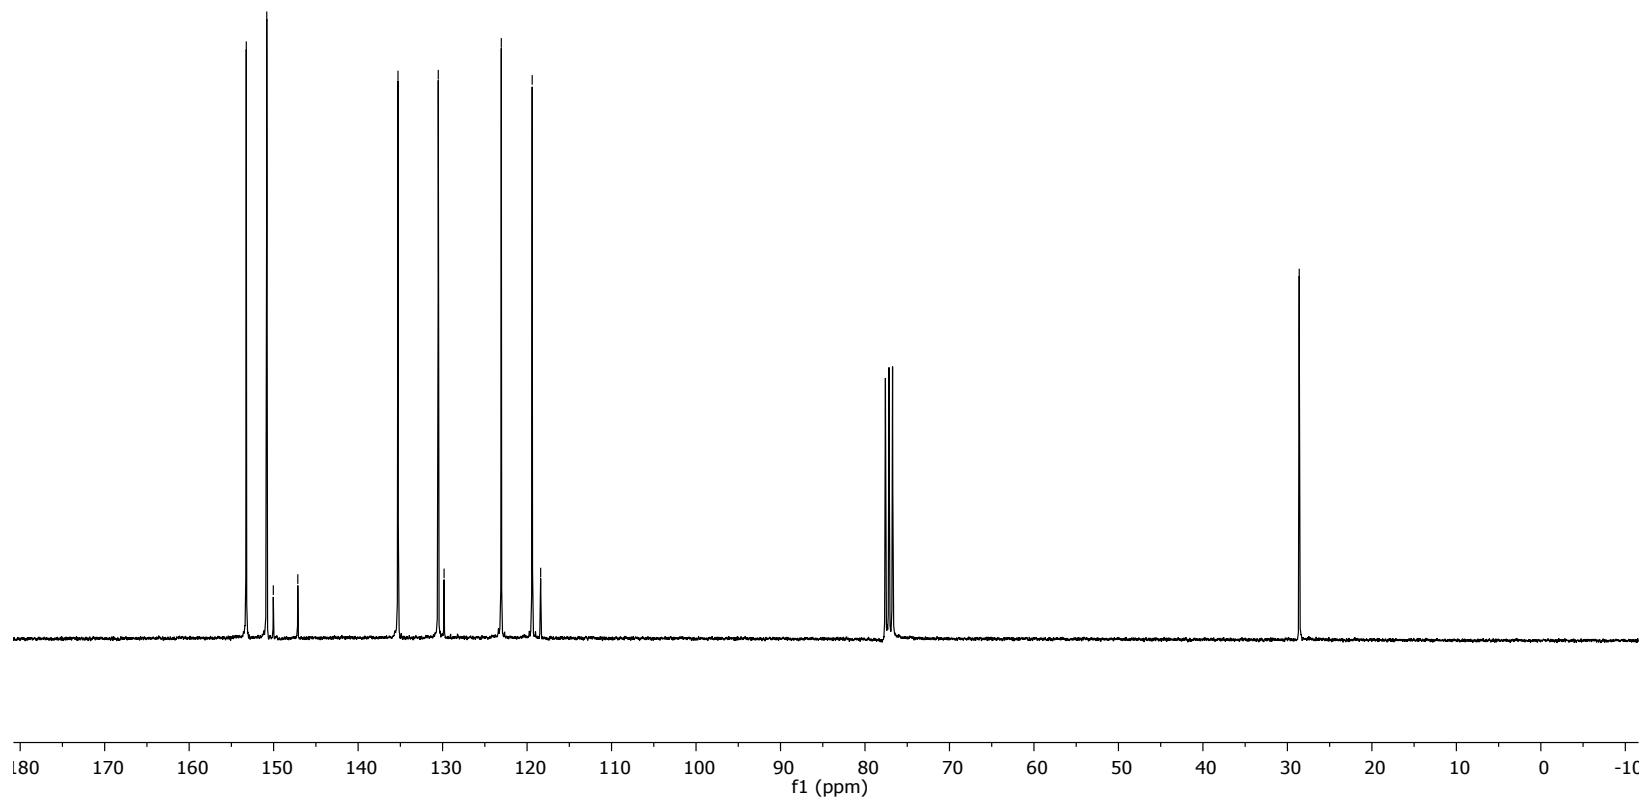

$^1\text{H-NMR}$  500 MHz,  $\text{CDCl}_3$

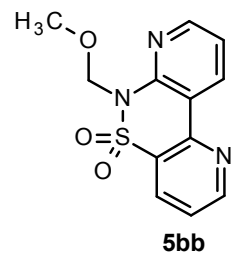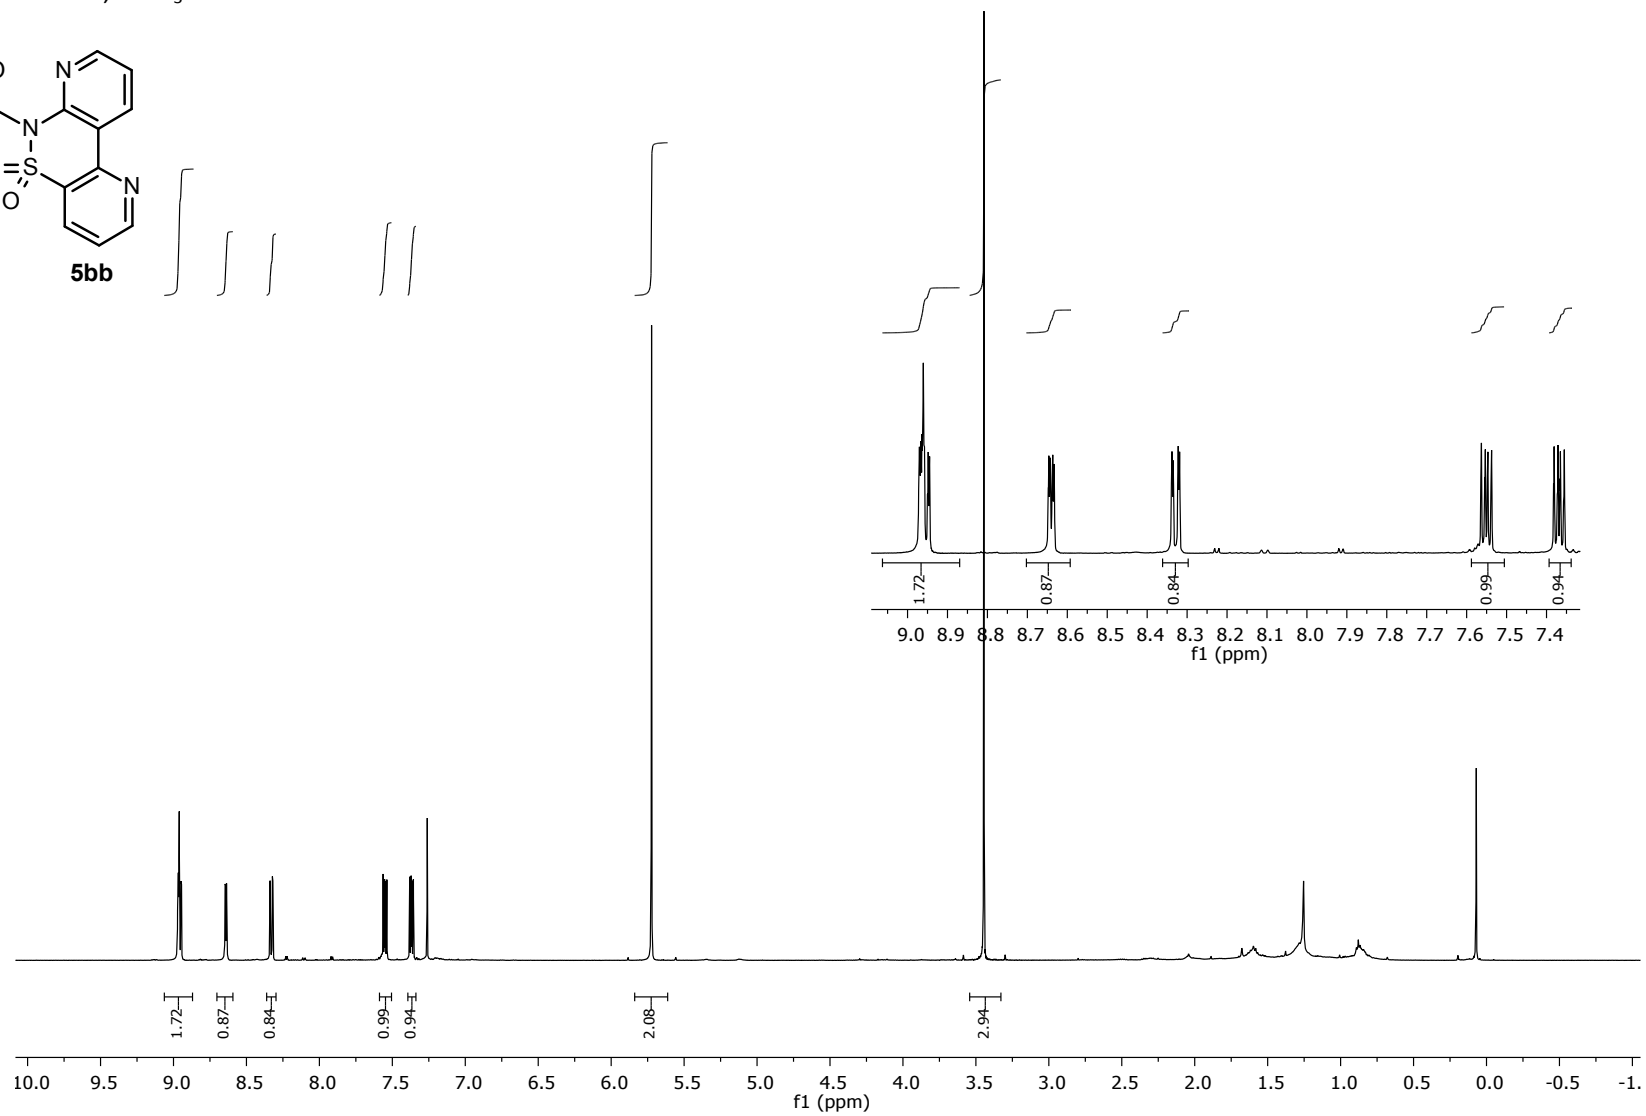

<sup>13</sup>C-NMR 75 MHz, CDCl<sub>3</sub>

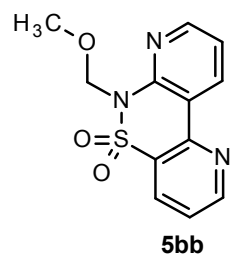

153.4  
151.3  
149.5  
147.5

135.9  
130.9  
130.5

123.3  
120.7  
119.4

75.7

57.4

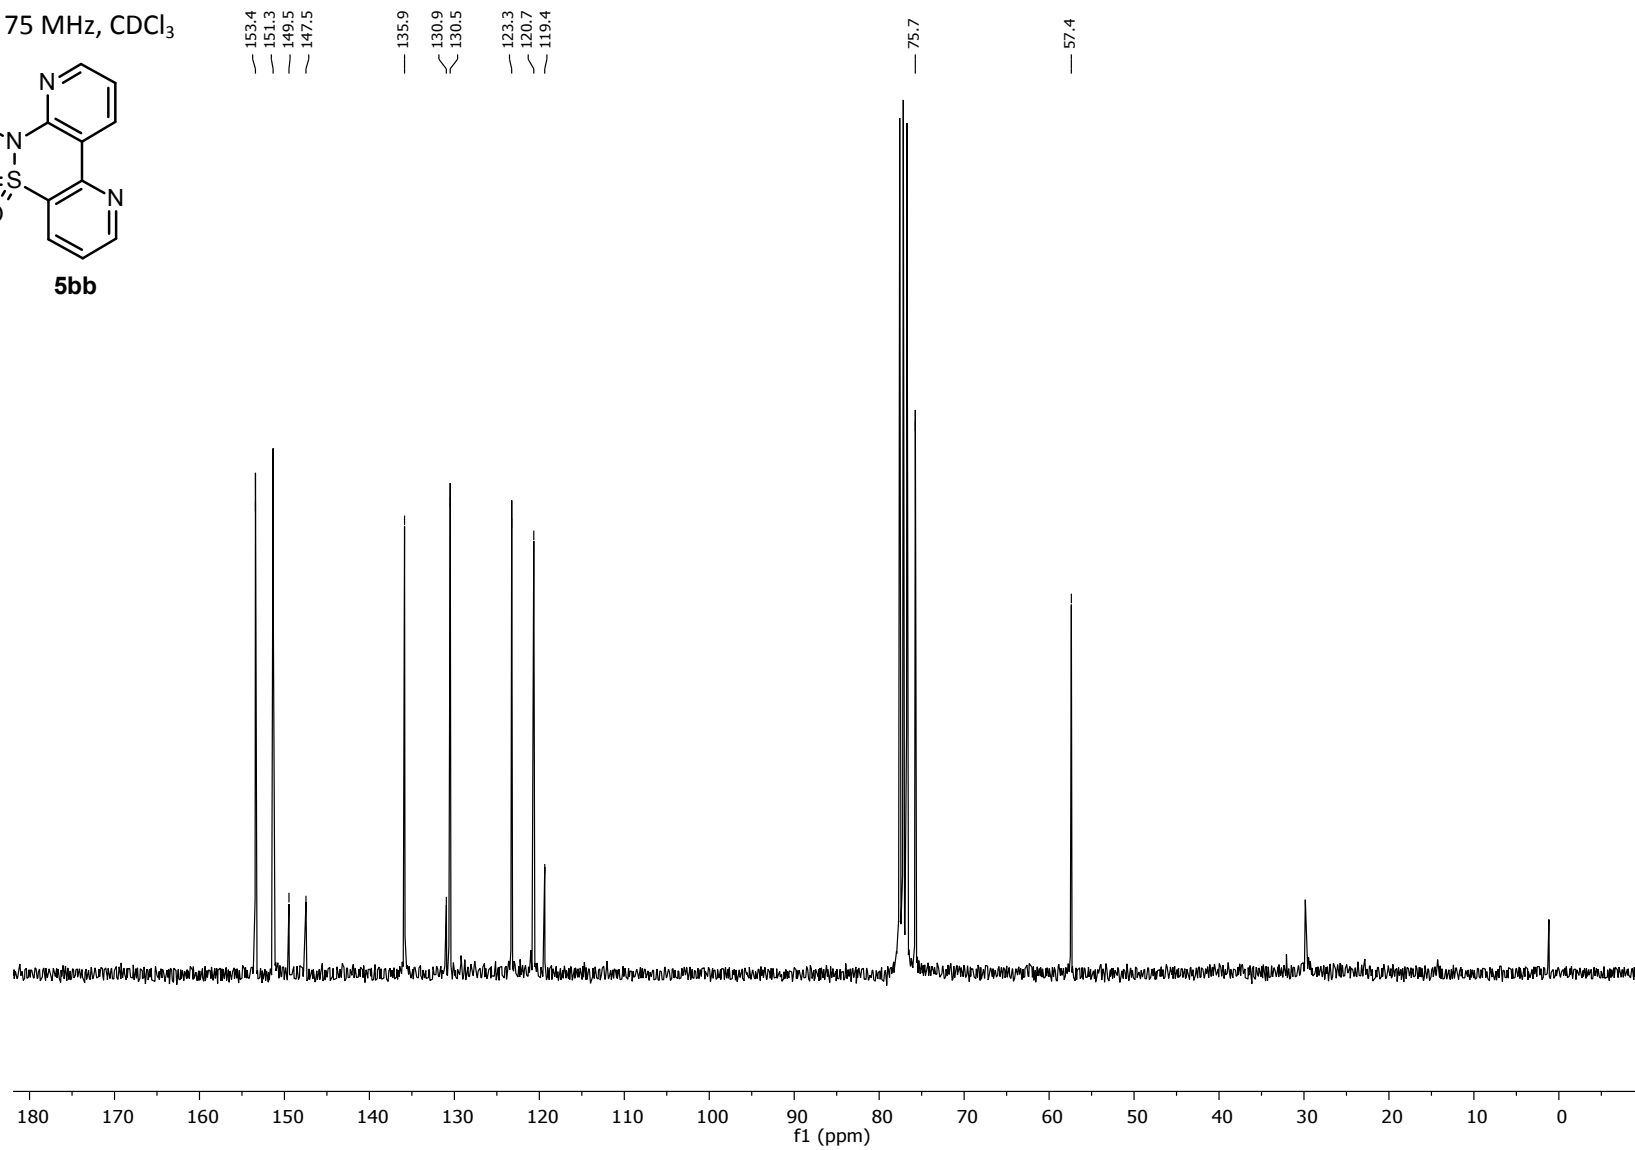

$^1\text{H-NMR}$  300 MHz,  $\text{CDCl}_3$

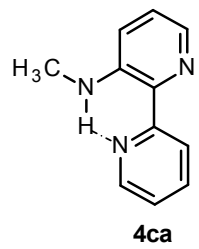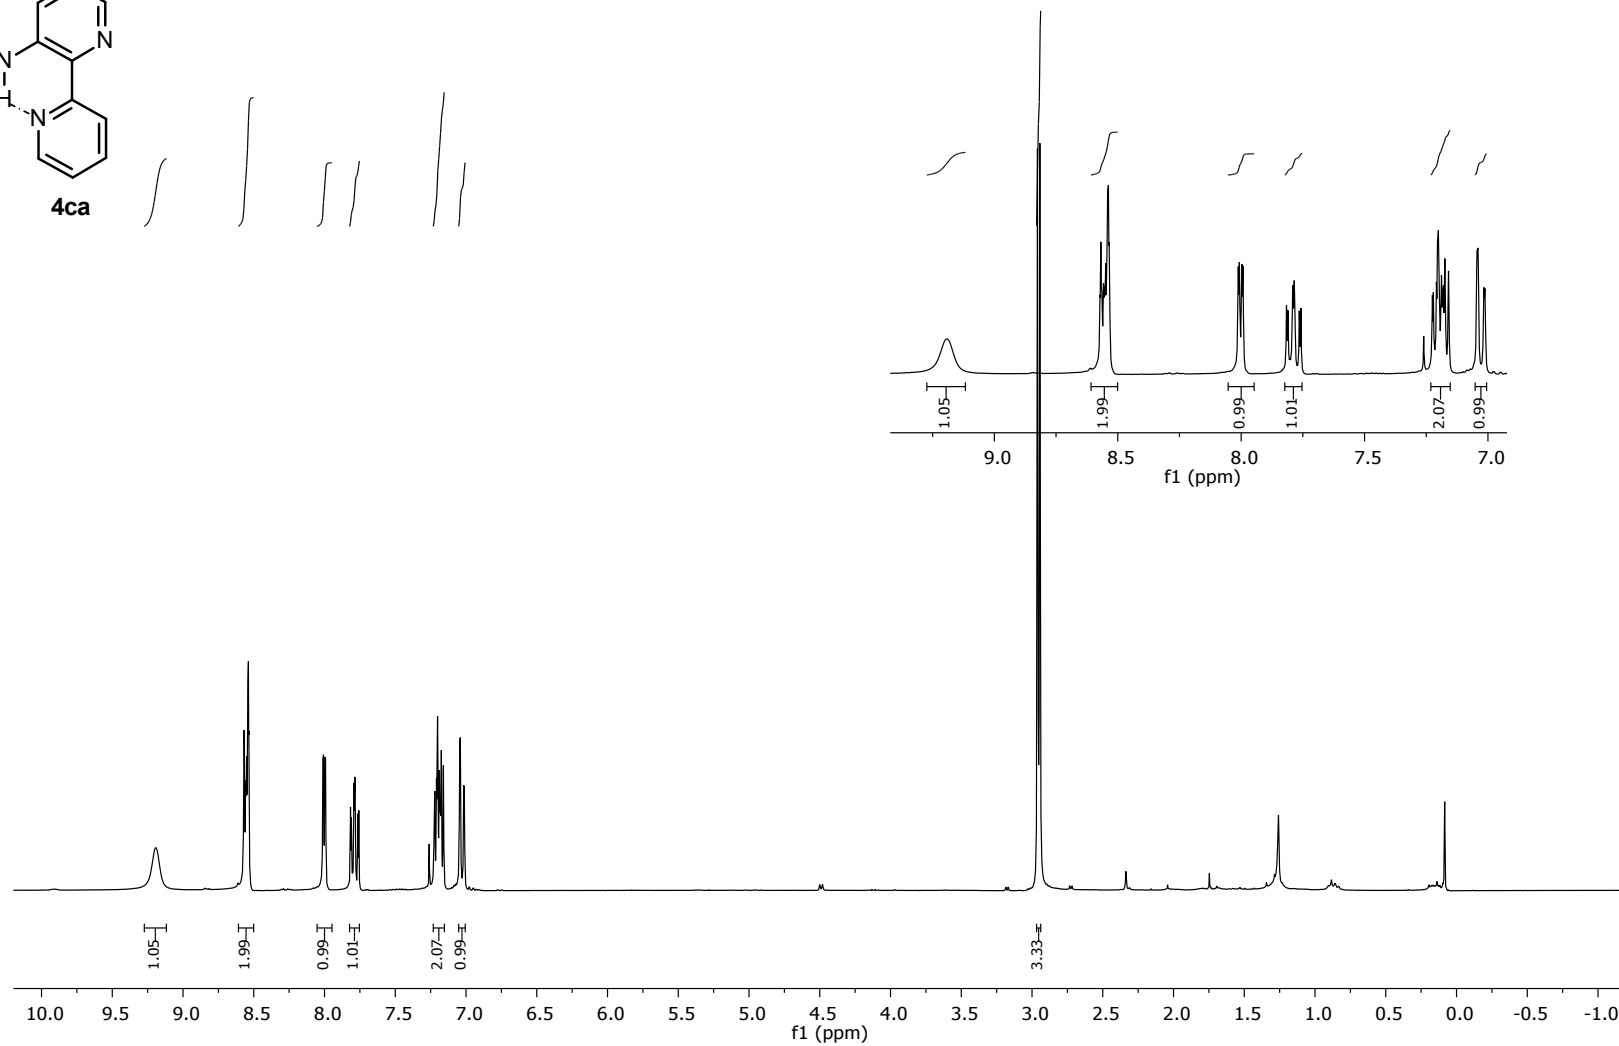

<sup>13</sup>C-NMR 75 MHz, CDCl<sub>3</sub>

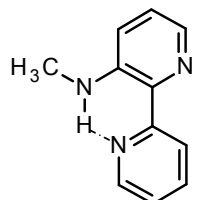

**4ca**

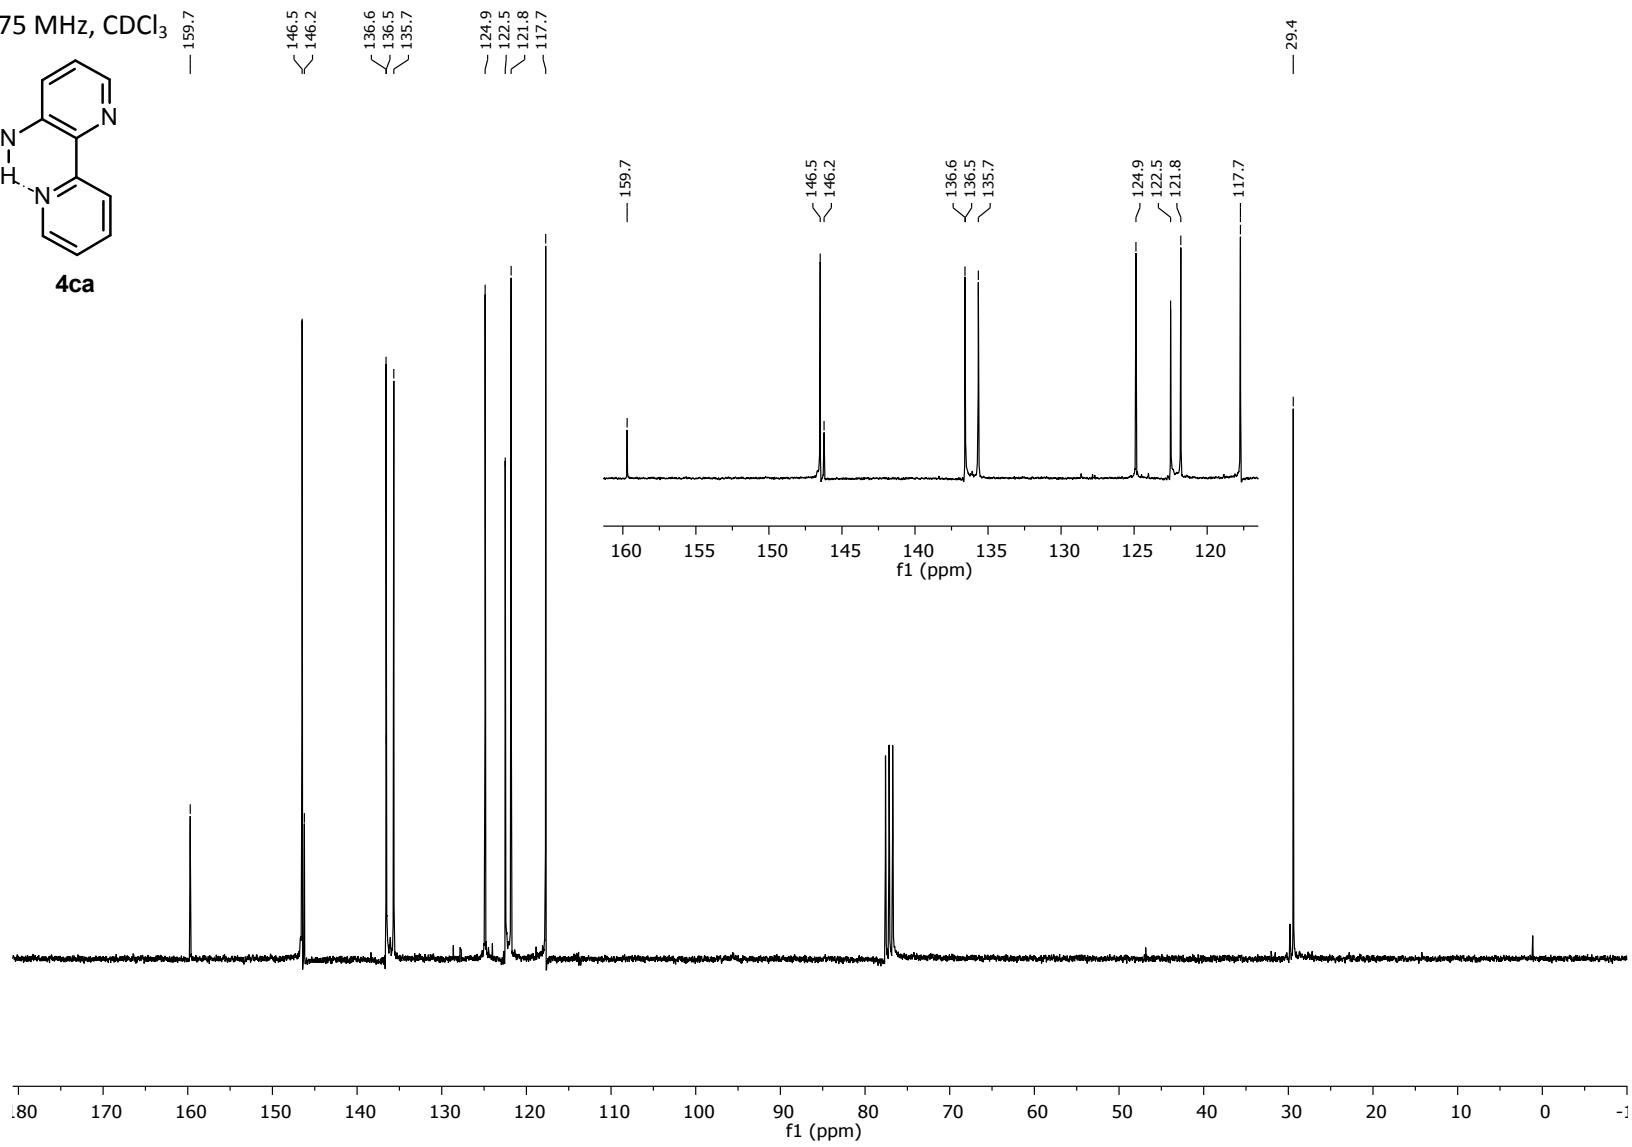



$^1\text{H-NMR}$  300 MHz,  $\text{CDCl}_3$

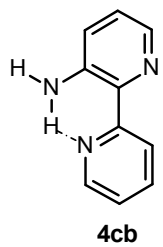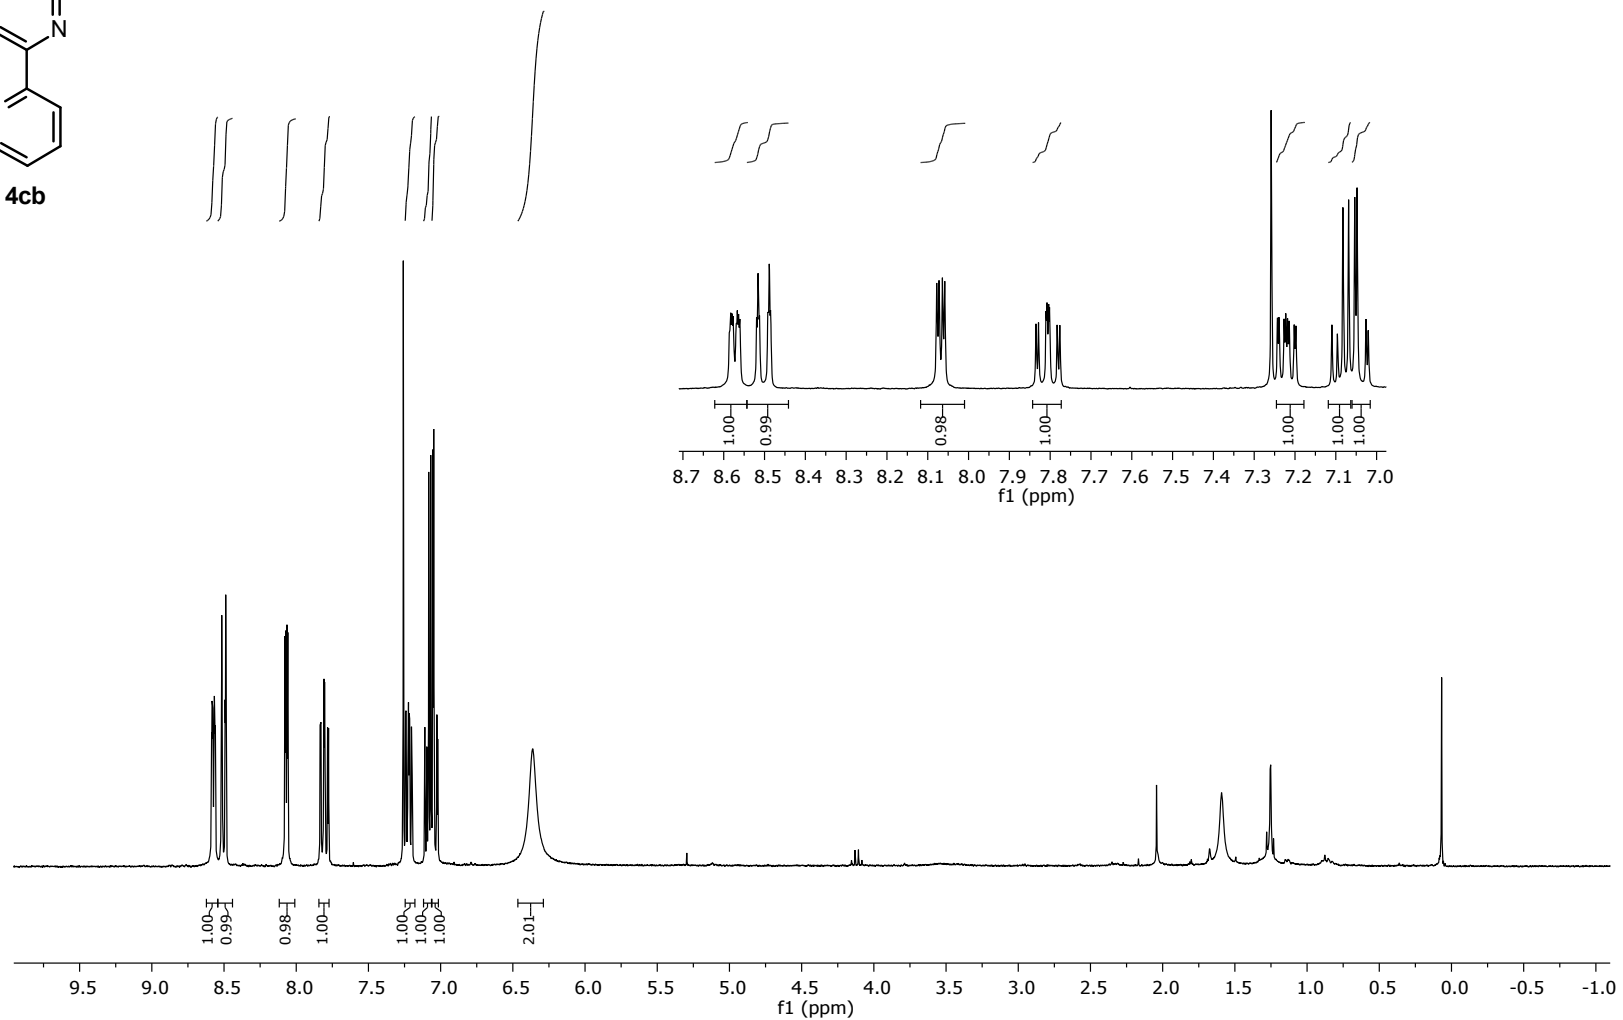

<sup>13</sup>C-NMR 126 MHz, CDCl<sub>3</sub>

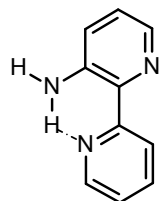

**4cb**

— 159.5

— 147.0

— 144.0

— 138.2

— 137.2

— 136.7

— 124.6

— 124.5

— 122.4

— 122.0

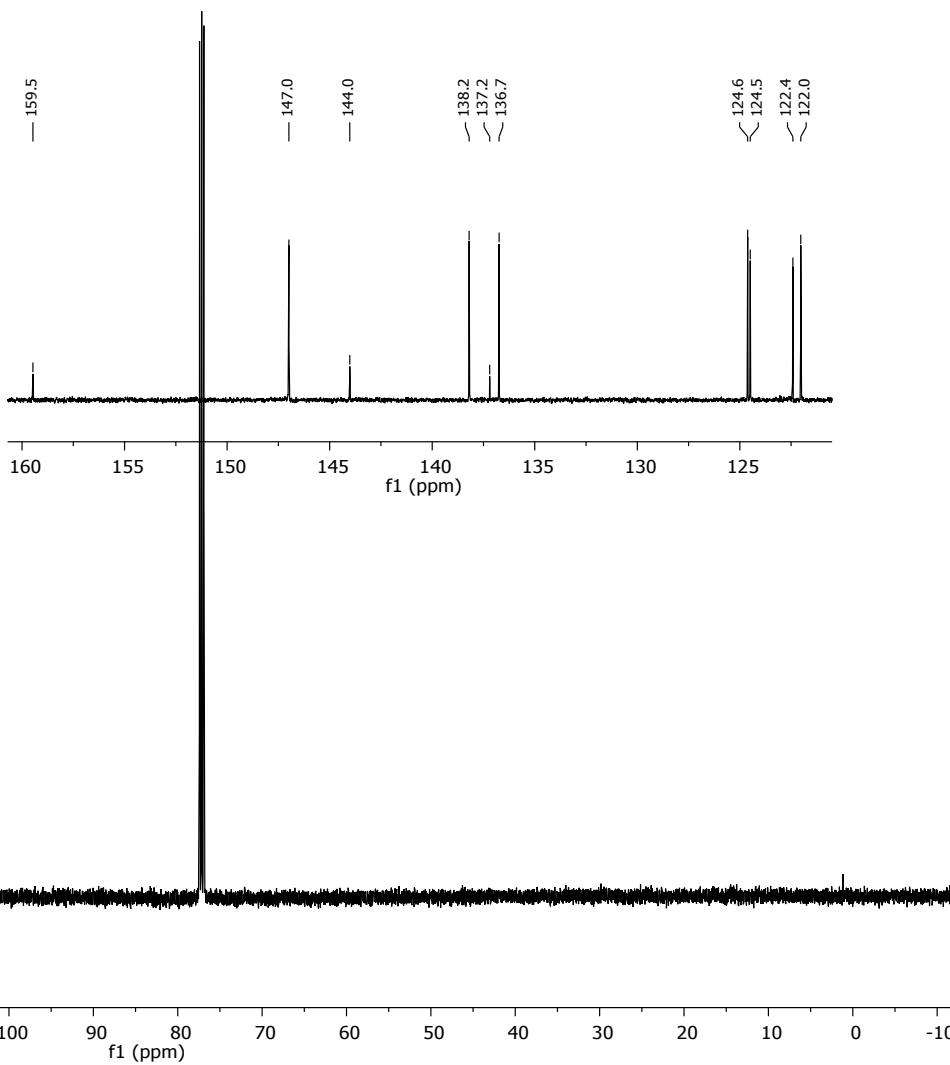

$^1\text{H-NMR}$  300 MHz,  $\text{CDCl}_3$

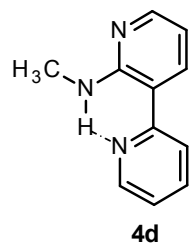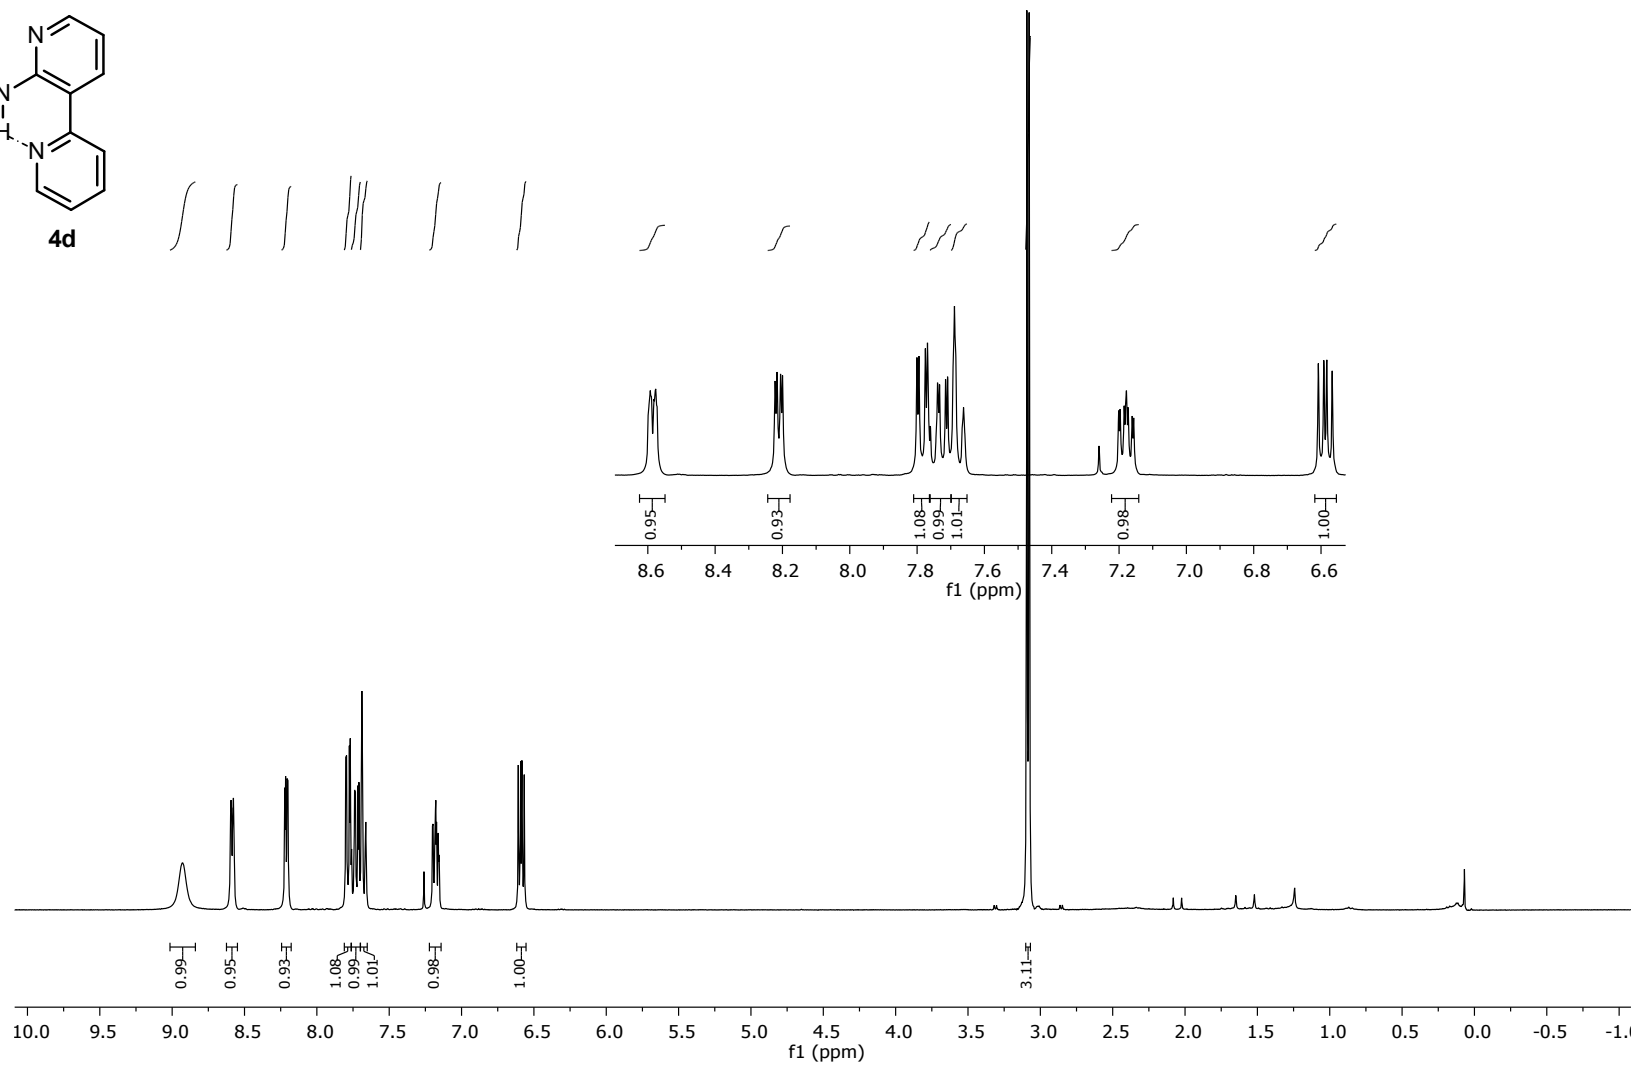

<sup>13</sup>C-NMR 75 MHz, CDCl<sub>3</sub>

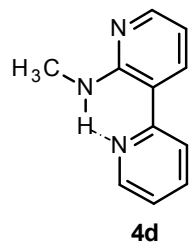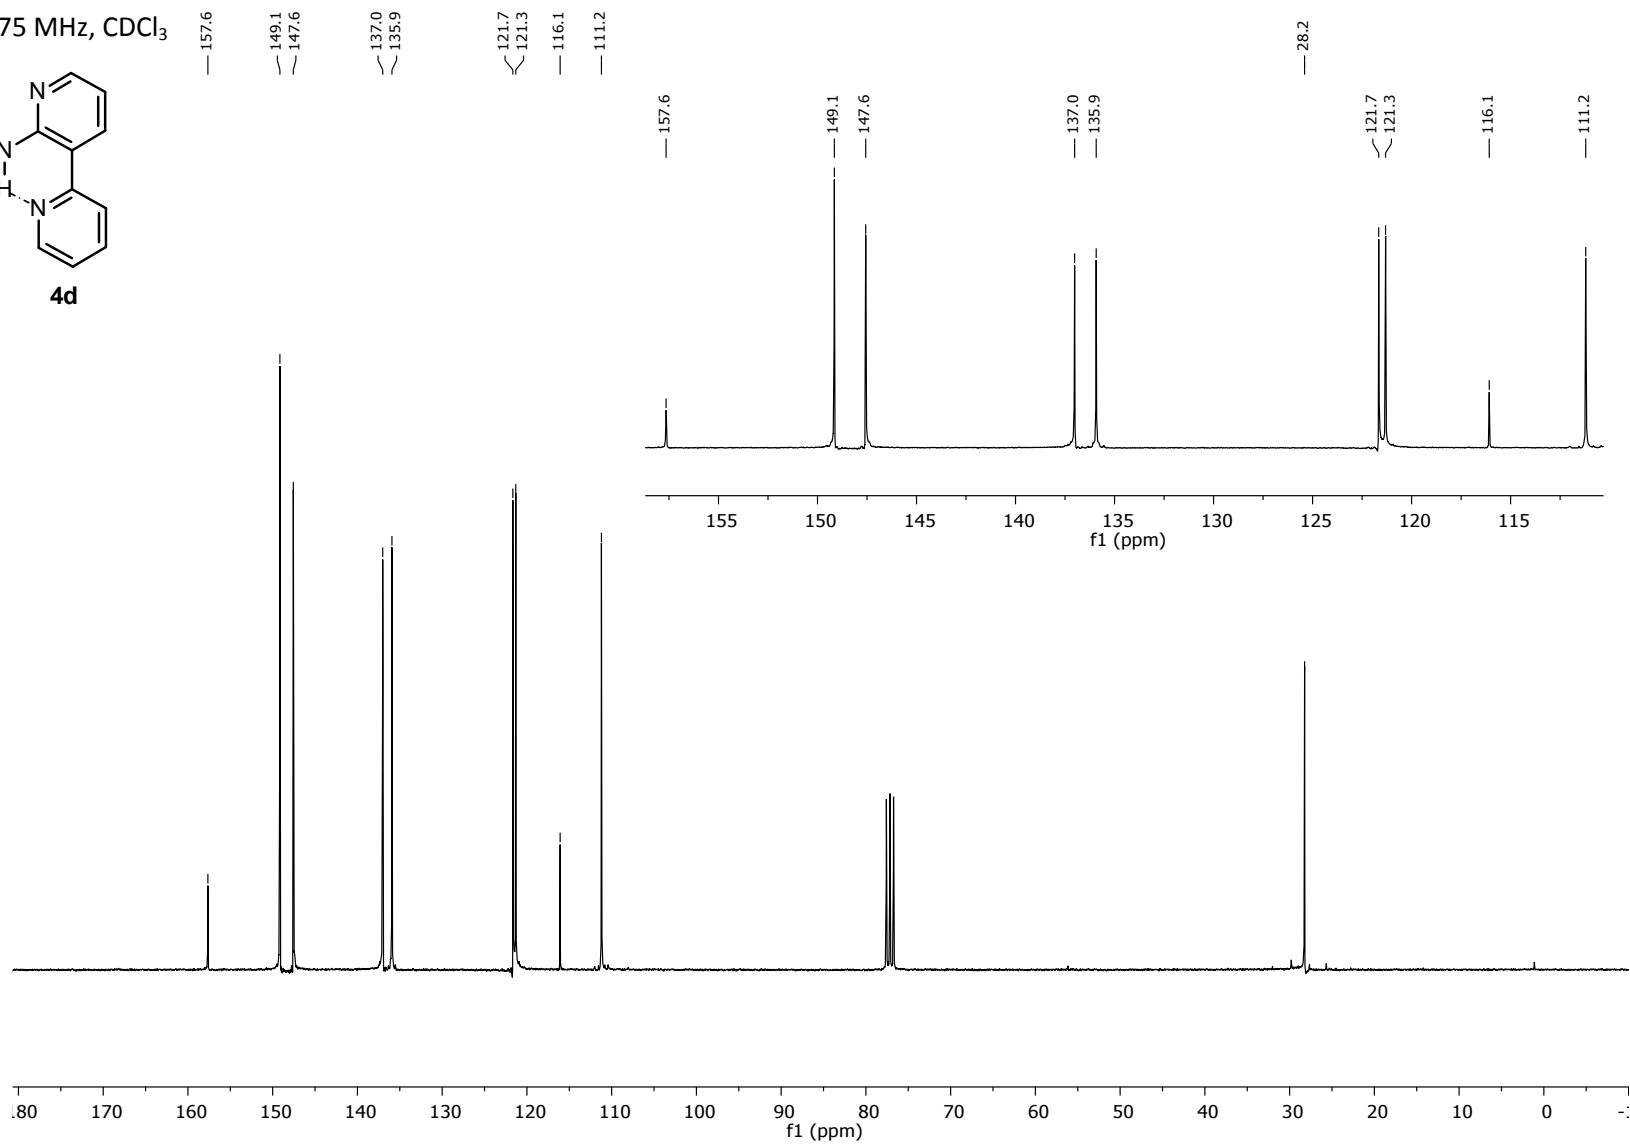

<sup>1</sup>H-NMR 300 MHz, CDCl<sub>3</sub>

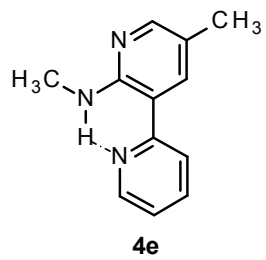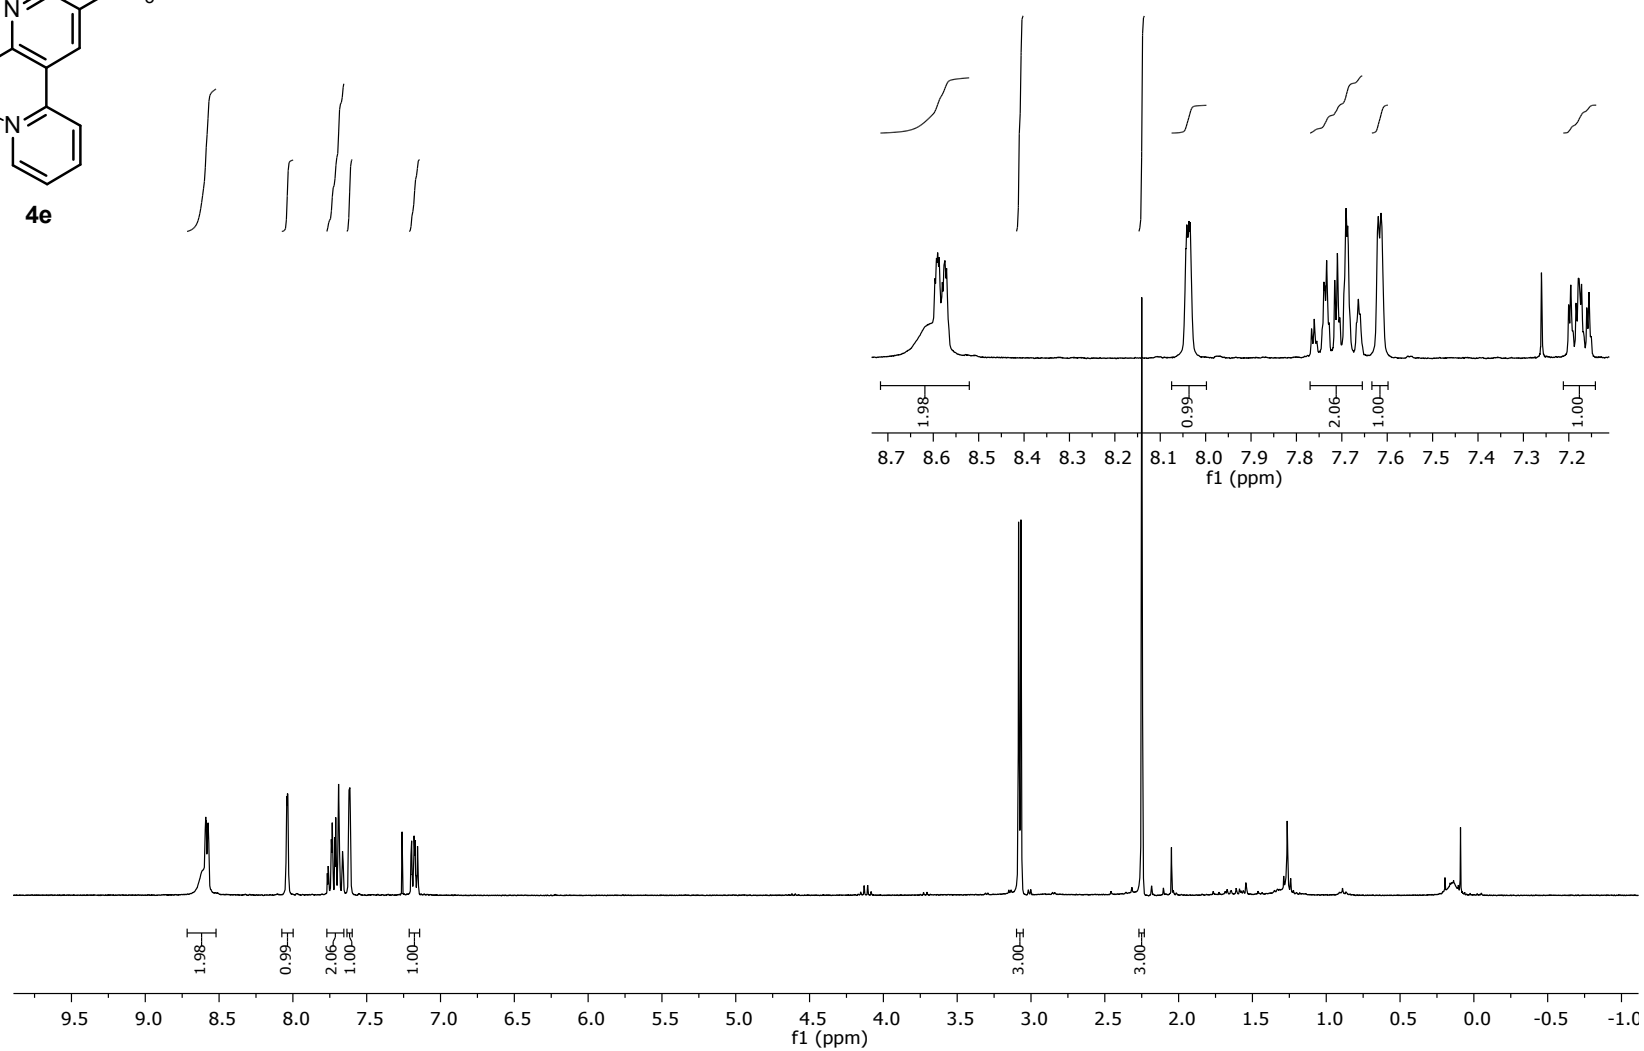

<sup>13</sup>C-NMR 75 MHz, CDCl<sub>3</sub>

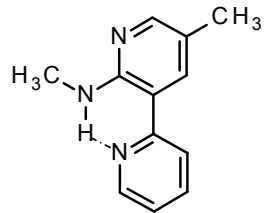

**4e**

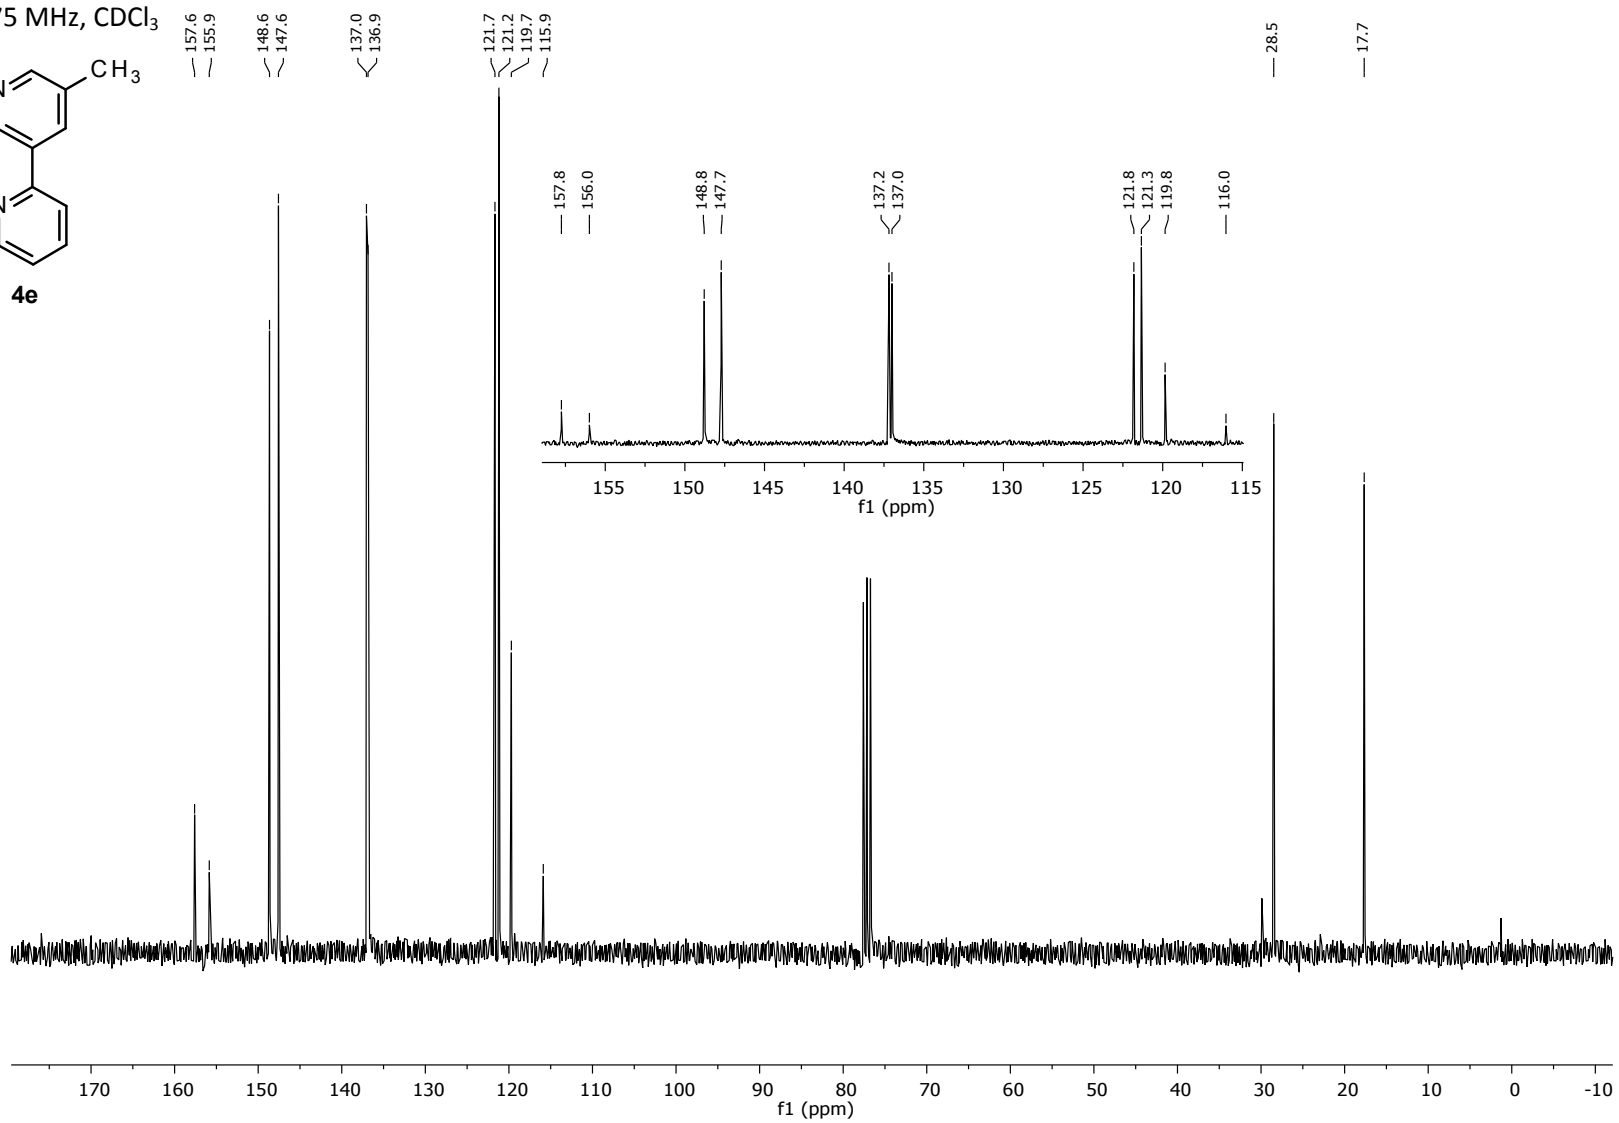

Supplement: d0ra02026e1.pdf [file d0ra02026e1.pdf]
